# Supplementary material for: Syntheses of 1-Aryl-5-nitro-1H-indazoles and a General One-Pot Route to 1-Aryl-1H-indazoles
Source: PubMed Central journal article supplement (PMC6017161; doi:10.3390/molecules23030674), 2018-03-16

# Syntheses of 1-Aryl-5-nitro-1*H*-indazoles and a General Sequential Route to 1-Aryl-1*H*-indazoles

Joel K. Annor-Gyamfi, Krishna Kumar Gnanasekaran and Richard A. Bunce\*

Department of Chemistry, Oklahoma State University, Stillwater, OK 74078-3071, USA

## Supplementary Information

|                                                                                                                   | page |
|-------------------------------------------------------------------------------------------------------------------|------|
| Table S-1. Optimization of conditions for the two-step procedure to produce 1-aryl-5-nitro-1 <i>H</i> -indazoles. | 4    |
| Table S-2. Optimization of conditions for the one-pot procedure to produce 1-aryl-5-nitro-1 <i>H</i> -indazoles.  | 5    |
| Table S-3: Optimization results for the general 1 <i>H</i> -indazole synthesis using 2-bromobenzaldehyde.         | 6    |
| Characterization data for hydrazones derived from 2'-fluoro-5'-nitroacetophenone                                  | 7–9  |
| Phenylhydrazone <b>9a</b>                                                                                         |      |
| (2-Methoxyphenyl)hydrazone <b>9b</b>                                                                              |      |
| (3-Methoxyphenyl)hydrazone <b>9c</b>                                                                              |      |
| (4-Methoxyphenyl)hydrazone <b>9d</b>                                                                              |      |
| (4-Bromophenyl)hydrazone <b>9e</b>                                                                                |      |
| (3-Chlorophenyl)hydrazone <b>9f</b>                                                                               |      |
| (4-Chlorophenyl)hydrazone <b>9g</b>                                                                               |      |
| (2,4-Dichlorophenyl)hydrazone <b>9h</b>                                                                           |      |
| (3-(Trifluoromethyl)phenyl)hydrazone <b>9i</b>                                                                    |      |
| (4-(Trifluoromethyl)phenyl)hydrazone <b>9j</b>                                                                    |      |
| (4-Cyanophenyl)hydrazone <b>9k</b>                                                                                |      |
| (4-Sulfonamidophenyl)hydrazone <b>9l</b>                                                                          |      |
| (4-Carboxyphenyl)hydrazone <b>9m</b>                                                                              |      |
| Characterization data for hydrazones derived from 2-fluoro-5-nitrobenzaldehyde                                    | 9–12 |
| Phenylhydrazone <b>10a</b>                                                                                        |      |
| (2-Methoxyphenyl)hydrazone <b>10b</b>                                                                             |      |
| (3-Methoxyphenyl)hydrazone <b>10c</b>                                                                             |      |
| (4-Methoxyphenyl)hydrazone <b>10d</b>                                                                             |      |
| (4-Bromophenyl)hydrazone <b>10e</b>                                                                               |      |
| (3-Chlorophenyl)hydrazone <b>10f</b>                                                                              |      |
| (4-Chlorophenyl)hydrazone <b>10g</b>                                                                              |      |
| (2,4-Dichlorophenyl)hydrazone <b>10h</b>                                                                          |      |
| (3-(Trifluoromethyl)phenyl)hydrazone <b>10i</b>                                                                   |      |
| (4-(Trifluoromethyl)phenyl)hydrazone <b>10j</b>                                                                   |      |
| (4-Cyanophenyl)hydrazone <b>10k</b>                                                                               |      |
| (4-Sulfonamidophenyl)hydrazone <b>10l</b>                                                                         |      |
| (4-Carboxyphenyl)hydrazone <b>10m</b>                                                                             |      |

| <sup>1</sup> H and <sup>13</sup> C NMR spectra for hydrazones derived from:        | page |
|------------------------------------------------------------------------------------|------|
| Phenylhydrazone <b>9a</b>                                                          | 13   |
| (2-Methoxyphenyl)hydrazone <b>9b</b>                                               | 14   |
| (3-Methoxyphenyl)hydrazone <b>9c</b>                                               | 15   |
| (4-Methoxyphenyl)hydrazone <b>9d</b>                                               | 16   |
| (4-Bromophenyl)hydrazone <b>9e</b>                                                 | 17   |
| (3-Chlorophenyl)hydrazone <b>9f</b>                                                | 18   |
| (4-Chlorophenyl)hydrazone <b>9g</b>                                                | 19   |
| (2,4-Dichlorophenyl)hydrazone <b>9h</b>                                            | 20   |
| (3-(Trifluoromethyl)phenyl)hydrazone <b>9i</b>                                     | 21   |
| (4-(Trifluoromethyl)phenyl)hydrazone <b>9j</b>                                     | 22   |
| (4-Cyanophenyl)hydrazone <b>9k</b>                                                 | 23   |
| (4-Sulfonamidophenyl)hydrazone <b>9l</b>                                           | 24   |
| (4-Carboxyphenyl)hydrazone <b>9m</b>                                               | 25   |
| Phenylhydrazone <b>10a</b>                                                         | 26   |
| (2-Methoxyphenyl)hydrazone <b>10b</b>                                              | 27   |
| (3-Methoxyphenyl)hydrazone <b>10c</b>                                              | 28   |
| (4-Methoxyphenyl)hydrazone <b>10d</b>                                              | 29   |
| (4-Bromophenyl)hydrazone <b>10e</b>                                                | 30   |
| (3-Chlorophenyl)hydrazone <b>10f</b>                                               | 31   |
| (4-Chlorophenyl)hydrazone <b>10g</b>                                               | 32   |
| (2,4-Dichlorophenyl)hydrazone <b>10h</b>                                           | 33   |
| (3-(Trifluoromethyl)phenyl)hydrazone <b>10i</b>                                    | 34   |
| (4-(Trifluoromethyl)phenyl)hydrazone <b>10j</b>                                    | 35   |
| (4-Cyanophenyl)hydrazone <b>10k</b>                                                | 36   |
| (4-Sulfonamidophenyl)hydrazone <b>10l</b>                                          | 37   |
| (4-Carboxyphenyl)hydrazone <b>10m</b>                                              | 38   |
| 3-Methyl-5-nitro-1 <i>H</i> -indazole ( <b>7</b> )                                 | 39   |
| 5-Nitro-1 <i>H</i> -indazole ( <b>8</b> )                                          | 40   |
| 3-Methyl-1-phenyl-5-nitro-1 <i>H</i> -indazole ( <b>11a</b> )                      | 41   |
| 1-(2-Methoxyphenyl)-3-methyl-5-nitro-1 <i>H</i> -indazole ( <b>11b</b> )           | 42   |
| 1-(3-Methoxyphenyl)-3-methyl-5-nitro-1 <i>H</i> -indazole ( <b>11c</b> )           | 43   |
| 1-(4-Methoxyphenyl)-3-methyl-5-nitro-1 <i>H</i> -indazole ( <b>11d</b> )           | 44   |
| 1-(4-Bromophenyl)-3-methyl-5-nitro-1 <i>H</i> -indazole ( <b>11e</b> )             | 45   |
| 1-(3-Chlorophenyl)-3-methyl-5-nitro-1 <i>H</i> -indazole ( <b>11f</b> )            | 46   |
| 1-(4-Chlorophenyl)-3-methyl-5-nitro-1 <i>H</i> -indazole ( <b>11g</b> )            | 47   |
| 1-(2,4-Dichlorophenyl)-3-methyl-5-nitro-1 <i>H</i> -indazole ( <b>11h</b> )        | 48   |
| 3-Methyl-5-nitro-1-(3-(trifluoromethyl)phenyl)-1 <i>H</i> -indazole ( <b>11i</b> ) | 49   |
| 3-Methyl-5-nitro-1-(4-(trifluoromethyl)phenyl)-1 <i>H</i> -indazole ( <b>11j</b> ) | 50   |
| 1-(4-Cyanophenyl)-3-methyl-5-nitro-1 <i>H</i> -indazole ( <b>11k</b> )             | 51   |
| 4-(3-Methyl-5-nitro-1 <i>H</i> -indazol-1-yl)benzenesulfonamide ( <b>11l</b> )     | 52   |
| 4-(3-Methyl-5-nitro-1 <i>H</i> -indazol-1-yl)benzoic acid ( <b>11m</b> )           | 53   |

| <sup>1</sup> H and <sup>13</sup> C NMR spectra for:                             | page |
|---------------------------------------------------------------------------------|------|
| 1-Phenyl-5-nitro-1 <i>H</i> -indazole ( <b>12a</b> )                            | 54   |
| 1-(3-Methoxyphenyl)-5-nitro-1 <i>H</i> -indazole ( <b>12c</b> )                 | 55   |
| 1-(4-Methoxyphenyl)-5-nitro-1 <i>H</i> -indazole ( <b>12d</b> )                 | 56   |
| 1-(4-Bromophenyl)-5-nitro-1 <i>H</i> -indazole ( <b>12e</b> )                   | 57   |
| 1-(3-Chlorophenyl)-5-nitro-1 <i>H</i> -indazole ( <b>12f</b> )                  | 58   |
| 1-(4-Chlorophenyl)-5-nitro-1 <i>H</i> -indazole ( <b>12g</b> )                  | 59   |
| 1-(2,4-Dichlorophenyl)-5-nitro-1 <i>H</i> -indazole ( <b>12h</b> )              | 60   |
| 5-Nitro-1-(3-(trifluoromethyl)phenyl)-1 <i>H</i> -indazole ( <b>12i</b> )       | 61   |
| 5-Nitro-1-(4-(trifluoromethyl)phenyl)-1 <i>H</i> -indazole ( <b>12j</b> )       | 62   |
| 1-(4-Cyanophenyl)-5-nitro-1 <i>H</i> -indazole ( <b>12k</b> )                   | 63   |
| 4-(5-Nitro-1 <i>H</i> -indazol-1-yl)benzenesulfonamide ( <b>12l</b> )           | 64   |
| 4-(5-Nitro-1 <i>H</i> -indazol-1-yl)benzoic acid ( <b>12m</b> )                 | 65   |
| 3-Methyl-1-phenyl-1 <i>H</i> -indazole ( <b>16a</b> )                           | 66   |
| 1-(4-Methoxyphenyl)-3-methyl-1 <i>H</i> -indazole ( <b>16d</b> )                | 67   |
| 4-(3-Methyl-1 <i>H</i> -indazol-1-yl)benzotrile ( <b>16k</b> )                  | 68   |
| 1-Phenyl-1 <i>H</i> -indazole ( <b>17a</b> )                                    | 69   |
| 1-(4-Methoxyphenyl)-1 <i>H</i> -indazole ( <b>17d</b> )                         | 70   |
| 4-(1 <i>H</i> -Indazol-1-yl)benzotrile ( <b>17k</b> )                           | 71   |
| 1-Phenyl-1 <i>H</i> -pyrazolo[3,4- <i>b</i> ]pyridine ( <b>18a</b> )            | 72   |
| 1-(4-Methoxyphenyl)-1 <i>H</i> -pyrazolo[3,4- <i>b</i> ]pyridine ( <b>18d</b> ) | 73   |
| 4-(1 <i>H</i> -Pyrazolo[3,4- <i>b</i> ]pyridin-1-yl)benzotrile ( <b>18k</b> )   | 74   |

Table S-1. Optimization of conditions for the two-step procedure to produce 1-aryl-5-nitro-1*H*-indazoles.

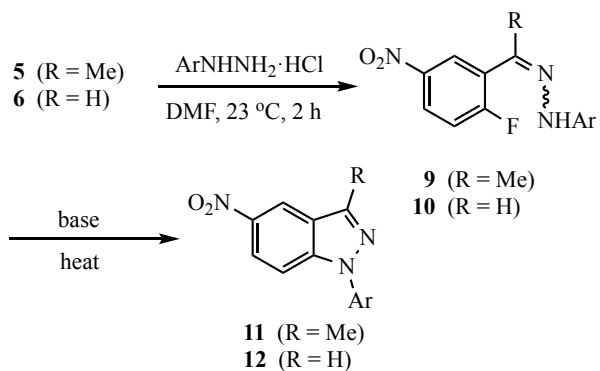

| Equiv ArNHNH <sub>2</sub> ·HCl | R  | Yield Hydrazone |
|--------------------------------|----|-----------------|
| 1.5                            | Me | 60%             |
|                                | H  | 85%             |
| 2.0                            | Me | 80%             |
|                                | H  | 95%*            |
| 2.5                            | Me | 85%             |
|                                | H  | 95%             |
| 3.0                            | Me | 96%*            |
|                                | H  | 92%             |

  

| Base                            | Equiv Base | T (°C) | Yield Indazole            |
|---------------------------------|------------|--------|---------------------------|
| K <sub>2</sub> CO <sub>3</sub>  | 2.0        | 90     | 50% for Me<br>33% for H   |
| K <sub>2</sub> CO <sub>3</sub>  | 2.5        | 90     | 85% for Me<br>65% for H   |
| Et <sub>3</sub> N               | 3.0        | 90     | 30% for Me<br><5% for H   |
| DBU                             | 3.0        | 90     | 65% for Me<br>25% for H   |
| Na <sub>2</sub> CO <sub>3</sub> | 3.0        | 90     | 52% for Me<br>10% for H   |
| K <sub>2</sub> CO <sub>3</sub>  | 3.0        | 50     | 50% for Me<br>20% for H   |
| K <sub>2</sub> CO <sub>3</sub>  | 3.0        | 90     | 95% for Me*<br>72% for H* |

\* indicates optimum conditions

The optimum conditions for hydrazone formation involved the use of 3.0 mmol of ArNHNH<sub>2</sub>·HCl with the ketone substrate, 2.0 mmol with the aldehyde substrate. Ring closure was best effected through the use of 3.0 mmol of K<sub>2</sub>CO<sub>3</sub> at 90 °C.

Table S-2. Optimization of conditions for the one-pot procedure to produce 1-aryl-5-nitro-1*H*-indazoles.

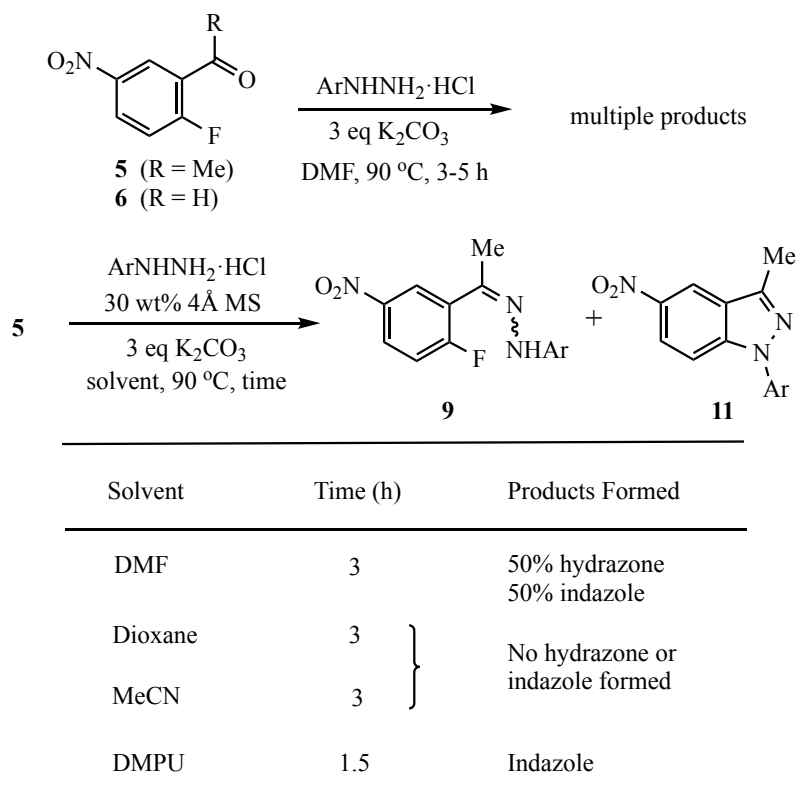

The one-step procedure to make 5-nitro-1-aryl-1*H*-indazoles was successful for the acetophenone substrate **1**. Benzaldehyde **2** gave higher yields when the reagents were added sequentially to first produce the hydrazone, followed by ring closure with base. The optimum conditions used 30 wt% of 4Å molecular sieves (to scavenge water) and DMPU as the solvent at 90 °C.

Table S-3: Optimization results for the general indazole synthesis using 2-bromobenzaldehyde.

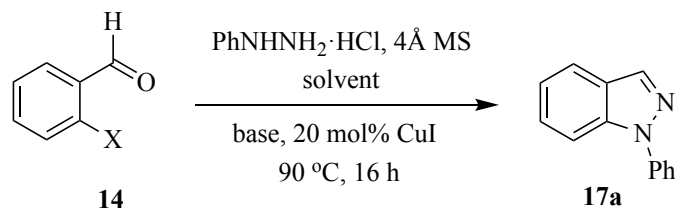

| Expt No | Equiv PhNHNH <sub>2</sub> ·HCl | Base                            | Equiv Base | Solvent     | % Yield         |
|---------|--------------------------------|---------------------------------|------------|-------------|-----------------|
| 1       | 3.0                            | K <sub>2</sub> CO <sub>3</sub>  | 3.5        | DMF         | < 5             |
| 2       | 1.5                            | K <sub>2</sub> CO <sub>3</sub>  | 2.5        | DMF         | 27              |
| 3       | 1.5                            | K <sub>2</sub> CO <sub>3</sub>  | 2.5        | DMF         | 48 <sup>a</sup> |
| 4       | 1.5                            | K <sub>2</sub> CO <sub>3</sub>  | 2.5        | DMPU        | 77 <sup>b</sup> |
| 5       | 1.5                            | K <sub>2</sub> CO <sub>3</sub>  | 2.5        | 1,4-dioxane | 35              |
| 6       | 1.5                            | Na <sub>2</sub> CO <sub>3</sub> | 2.5        | DMPU        | 22              |
| 7       | 1.5                            | DBU                             | 2.5        | DMPU        | 36              |
| 8       | 1.5                            | TMG <sup>c</sup>                | 2.5        | DMPU        | 51              |

<sup>a</sup>All reagents were added and then gradually heated to 90-100 °C; <sup>b</sup> Substrate **14**, PhNHNH<sub>2</sub>·HCl and 30 wt% of powdered 4Å molecular sieves were added and immersed into a pre-heated oil bath at 90 °C, stirred for 1.5 h, and then 20 mol% CuI and base were added. <sup>c</sup>Tetramethylguanidine.

Optimum conditions for the general synthesis of 1-aryl-1*H*-indazoles involved mixing 1.5 equiv of the ArNHNH<sub>2</sub>·HCl, 2.5 equiv of K<sub>2</sub>CO<sub>3</sub> and 30 wt% of powdered 4Å molecular sieves in 5 mL of DMPU and heating at 90 °C (pre-heated oil bath). After 1.5 h, 20 mol% of CuI and 2.5 equiv of K<sub>2</sub>CO<sub>3</sub> were added and heating was resumed at 90 °C for *ca* 16 h. Filtration, aqueous work-up and silica gel chromatography afforded the final product in pure form.

### Characterization of arylhydrazones from 2'-fluoro-5'-nitroacetophenone.

**Phenylhydrazone (9a):** Yield: 259 mg (0.95 mmol, 95%) as an orange solid, mp 136-138 °C. IR (nujol): 3297, 1531, 1347  $\text{cm}^{-1}$ .  $^1\text{H}$  NMR (400 MHz,  $\text{DMSO-}d_6$ ):  $\delta$  9.61 (s, 1H), 8.46 (dd,  $J = 6.7$ , 3.0 Hz, 1H), 8.22 (dt,  $J = 9.0$ , 3.6 Hz, 1H), 7.54 (t,  $J = 9.9$  Hz, 1H), 7.29-7.20 (complex, 4H), 6.81 (m, 1H), 2.31 (s, 3H);  $^{13}\text{C}$  NMR (100 MHz,  $\text{DMSO-}d_6$ ):  $\delta$  162.4 (d,  $J = 256.4$  Hz), 144.7, 143.4, 135.1, 128.6, 128.5 (d,  $J = 13.3$  Hz), 128.4, 124.0 (d,  $J = 7.9$  Hz), 119.1, 117.5 (d,  $J = 25.7$  Hz), 112.4, 15.1.

**(2-Methoxyphenyl)hydrazone (9b):** Yield: 248 mg (0.82 mmol, 82%) as a brown solid, mp 120-121 °C. IR (nujol): 3299, 1531, 1338  $\text{cm}^{-1}$ .  $^1\text{H}$  NMR (400 MHz,  $\text{DMSO-}d_6$ ):  $\delta$  8.46 (dd,  $J = 6.6$ , 3.0 Hz, 1H), 8.33 (s, 1H), 8.25 (dt,  $J = 9.0$ , 3.7 Hz, 1H), 7.37 (d,  $J = 7.7$  Hz), 7.01 (d,  $J = 7.9$  Hz, 1H), 6.93 (s,  $J = 7.5$  Hz, 1H), 6.85 (t,  $J = 7.6$  Hz, 1H), 3.88 (s, 3H), 2.33 (s, 3H);  $^{13}\text{C}$  NMR (100 MHz,  $\text{DMSO-}d_6$ ):  $\delta$  163.4 (d,  $J = 257.2$  Hz), 146.2, 144.5, 138.5, 134.2, 129.3 (d,  $J = 13.8$  Hz), 125.4 (d,  $J = 10.8$  Hz), 125.1 (d,  $J = 5.8$  Hz), 121.6, 120.6, 118.5 (d,  $J = 25.6$  Hz), 112.9, 111.3, 56.1, 15.4.

**(3-Methoxyphenyl)hydrazone (9c):** Yield: 251 mg (0.83 mmol, 83%) as an orange solid, mp 120-121 °C. IR (nujol): 3295, 1528, 1341  $\text{cm}^{-1}$ .  $^1\text{H}$  NMR (400 MHz,  $\text{DMSO-}d_6$ ):  $\delta$  9.60 (s, 1H), 8.46 (dd,  $J = 6.2$ , 3.0 Hz, 1H), 8.22 (dt,  $J = 9.3$ , 3.7 Hz, 1H), 7.53 (t,  $J = 9.8$  Hz, 1H), 7.13 (d,  $J = 8.3$  Hz, 1H), 6.82 (m, 2H), 6.40 (d,  $J = 8.0$  Hz, 1H), 3.73 (s, 3H), 2.30 (s, 3H);  $^{13}\text{C}$  NMR (100 MHz,  $\text{DMSO-}d_6$ ):  $\delta$  163.4 (d,  $J = 257.7$  Hz), 160.6, 147.1, 144.5, 136.2, 130.3, 129.5 (d,  $J = 13.3$  Hz), 125.1, 125.0 (d,  $J = 4.4$  Hz), 118.5 (d,  $J = 25.9$  Hz), 106.2, 105.6, 99.3, 55.3, 16.1.

**(4-Methoxyphenyl)hydrazone (9d):** Yield: 273 mg (0.90 mmol, 90%) as a dark red solid, mp 112-114 °C. IR (nujol): 3302, 1531, 1350  $\text{cm}^{-1}$ .  $^1\text{H}$  NMR (400 MHz,  $\text{DMSO-}d_6$ ):  $\delta$  9.42 (s, 1H), 8.44 (dd,  $J = 6.7$ , 3.0 Hz, 1H), 8.19 (dt,  $J = 9.0$ , 3.6 Hz, 1H), 7.52 (dd,  $J = 10.8$ , 9.0 Hz, 1H), 7.17 (d,  $J = 9.0$  Hz, 2H), 6.87 (d,  $J = 9.0$  Hz, 2H), 3.85 (s, 3H), 2.28 (s, 3H);  $^{13}\text{C}$  NMR (100 MHz,  $\text{DMSO-}d_6$ ):  $\delta$  163.6 (d,  $J = 257.0$  Hz), 153.7, 144.5, 142.0, 141.3, 139.8, 129.7 (d,  $J = 13.3$  Hz), 124.9 (d,  $J = 6.6$  Hz), 118.4 (d,  $J = 25.8$  Hz), 115.3, 114.9, 55.7, 16.0.

**(4-Bromophenyl)hydrazone (9e):** Yield: 333 mg (0.95 mmol, 95%) as an orange solid, mp 183-185 °C. IR (nujol): 3287, 1529, 1343  $\text{cm}^{-1}$ .  $^1\text{H}$  NMR (400 MHz,  $\text{DMSO-}d_6$ ):  $\delta$  9.76 (s, 1H), 8.44 (dd,  $J = 6.8$ , 3.1 Hz, 1H), 8.24 (dt,  $J = 9.0$ , 3.7 Hz, 1H), 7.57 (t,  $J = 9.8$  Hz, 1H), 7.41 (d,  $J = 8.6$  Hz, 2H), 7.18 (d,  $J = 8.6$  Hz, 2H), 2.31 (s, 3H);  $^{13}\text{C}$  NMR (100 MHz,  $\text{DMSO-}d_6$ ):  $\delta$  161.3 (d,  $J =$

256.8 Hz), 144.1, 143.4, 136.2, 131.1, 128.4 (d,  $J = 13.5$  Hz), 124.3 (d,  $J = 10.9$  Hz), 124.1 (d,  $J = 5.9$  Hz), 117.4 (d,  $J = 25.7$  Hz), 114.3, 110.1, 15.3.

**(3-Chlorophenyl)hydrazone (9f)**: Yield: 261 mg (0.85 mmol, 85%) as an orange solid, mp 143-144 °C. IR (nujol): 3286, 1535, 1337  $\text{cm}^{-1}$ ;  $^1\text{H}$  NMR (400 MHz,  $\text{DMSO-}d_6$ ):  $\delta$  9.78 (s, 1H), 8.44 (dd,  $J = 6.3, 3.0$  Hz, 1H), 8.23 (dt,  $J = 9.0, 3.7$  Hz, 1H), 7.55 (t,  $J = 9.9$  Hz, 1H), 7.26 (t,  $J = 8.0$  Hz, 1H), 7.24 (s, 1H), 7.16 (d,  $J = 8.0$  Hz, 1H), 6.83 (d,  $J = 7.6$  Hz, 1H), 2.31 (s, 3H);  $^{13}\text{C}$  NMR (100 MHz,  $\text{DMSO-}d_6$ ):  $\delta$  163.5 (d,  $J = 257.8$  Hz), 147.3, 144.5, 137.9, 134.1, 131.1, 129.3 (d,  $J = 13.5$  Hz), 125.4 (d,  $J = 10.9$  Hz), 125.2 (d,  $J = 6.2$  Hz), 119.5, 118.5 (d,  $J = 25.7$  Hz), 112.8, 112.1, 16.4.

**(4-Chlorophenyl)hydrazone (9g)**: Yield: 301 mg (0.98 mmol, 98%) as an orange solid, mp 159-161 °C. IR (nujol): 3285, 1528, 1343  $\text{cm}^{-1}$ ;  $^1\text{H}$  NMR (400 MHz,  $\text{DMSO-}d_6$ ):  $\delta$  9.75 (s, 1H), 8.44 (dd,  $J = 6.6, 3.0$  Hz, 1H), 8.24 (dt,  $J = 9.0, 3.7$  Hz, 1H), 7.55 (t,  $J = 9.9$  Hz, 1H), 7.29 (d,  $J = 8.8$  Hz, 2H), 7.22 (d,  $J = 8.8$  Hz, 2H), 2.31 (s, 3H);  $^{13}\text{C}$  NMR (100 MHz,  $\text{DMSO-}d_6$ ):  $\delta$  163.5 (d,  $J = 256.8$  Hz), 144.8, 144.5, 137.2, 129.4 (d,  $J = 13.6$  Hz), 129.3, 125.3 (d,  $J = 10.9$  Hz), 125.2 (d,  $J = 5.9$  Hz), 123.5, 118.5 (d,  $J = 25.8$  Hz), 114.9, 16.4.

**(2,4-Dichlorophenyl)hydrazone (9h)**: Yield: 289 mg (0.92 mmol, 92%) as a pale orange solid, mp 138-139 °C. IR (nujol): 3315, 1535, 1347  $\text{cm}^{-1}$ ;  $^1\text{H}$  NMR (400 MHz,  $\text{DMSO-}d_6$ ):  $\delta$  8.60 (s, 1H), 8.45 (dd,  $J = 6.6, 3.0$  Hz, 1H), 8.29 (dt,  $J = 9.0, 3.8$  Hz, 1H), 7.58 (t,  $J = 9.9$  Hz, 1H), 7.58 (d,  $J = 2.3$  Hz, 1H), 7.52 (d,  $J = 8.8$  Hz, 1H), 7.38 (dd,  $J = 8.9, 2.4$  Hz, 1H), 2.39 (s, 3H);  $^{13}\text{C}$  NMR (100 MHz,  $\text{DMSO-}d_6$ ):  $\delta$  160.5 (d,  $J = 256.4$  Hz), 144.5, 142.1, 140.7, 129.2, 128.9 (d,  $J = 13.8$  Hz), 128.7, 126.0 (d,  $J = 10.9$  Hz), 125.4 (d,  $J = 5.7$  Hz), 124.4, 119.1, 118.6 (d,  $J = 25.2$  Hz), 116.6, 16.1.

**(3-(Trifluoromethyl)phenyl)hydrazone (9i)**: Yield: 270 mg (0.84 mmol, 84%) as a yellow solid, mp 122-123 °C. IR (nujol): 3294, 1533, 1342  $\text{cm}^{-1}$ ;  $^1\text{H}$  NMR (400 MHz,  $\text{DMSO-}d_6$ ):  $\delta$  9.93 (s, 1H), 8.46 (dd,  $J = 6.3, 3.0$  Hz, 1H), 8.25 (dt,  $J = 8.9, 3.6$  Hz, 1H), 7.56 (t,  $J = 9.8$  Hz, 1H), 7.52-7.45 (complex, 3H), 7.13 (d,  $J = 6.1$  Hz, 1H), 2.33 (s, 3H);  $^{13}\text{C}$  NMR (100 MHz,  $\text{DMSO-}d_6$ ):  $\delta$  163.5 (d,  $J = 257.1$  Hz), 146.2, 144.5, 138.3, 130.6, 130.3 (q,  $J = 31.3$  Hz), 129.2 (d,  $J = 13.2$  Hz), 125.9 (d,  $J = 10.7$  Hz), 125.2 (d,  $J = 4.8$  Hz), 124.8 (q,  $J = 271.9$  Hz), 118.5 (d,  $J = 25.6$  Hz), 116.9, 116.0 (q,  $J = 3.7$  Hz), 109.5 (q,  $J = 3.9$  Hz), 16.4.

**(4-(Trifluoromethyl)phenyl)hydrazone (9j)**: Yield: 303 mg (0.94 mmol, 94%) as a yellow solid, mp 185-186 °C. IR (nujol): 3292, 1544, 1346  $\text{cm}^{-1}$ ;  $^1\text{H}$  NMR (400 MHz,  $\text{DMSO-}d_6$ ):  $\delta$  10.0 (s,



1H), 8.45 (dd,  $J = 6.7, 3.0$  Hz, 1H), 8.26 (dt,  $J = 9.0, 3.7$  Hz, 1H), 7.59 (d,  $J = 8.4$  Hz, 2H), 7.56 (t,  $J = 9.8$  Hz, 1H), 7.36 (d,  $J = 8.4$  Hz, 2H), 2.34 (s, 3H);  $^{13}\text{C}$  NMR (100 MHz, DMSO- $d_6$ ):  $\delta$  163.5 (d,  $J = 256.8$  Hz), 148.5, 144.5, 139.0, 129.3 (d,  $J = 13.4$  Hz), 126.8 (q,  $J = 9.1$  Hz), 125.6 (d,  $J = 11.0$  Hz), 125.4 (q,  $J = 270.1$  Hz), 125.3 (d,  $J = 5.6$  Hz), 119.9 (q,  $J = 24.9$  Hz), 118.5 (d,  $J = 25.5$  Hz), 113.2, 16.5.

**(4-Cyanophenyl)hydrazone (9k)**: Yield: 292 mg (0.98 mmol, 98%) as a pale orange solid, mp 206-208 °C. IR (nujol): 2215, 1532, 1350  $\text{cm}^{-1}$ :  $^1\text{H}$  NMR (400 MHz, DMSO- $d_6$ ):  $\delta$  10.2 (s, 1H), 8.45 (d,  $J = 6.5, 3.0$  Hz, 1H), 8.27 (m, 1H), 7.68 (d,  $J = 8.4$  Hz, 2H), 7.57 (t,  $J = 9.8$  Hz, 1H), 7.32 (d,  $J = 8.4$  Hz, 2H), 2.35 (s, 3H);  $^{13}\text{C}$  NMR (100 MHz, DMSO- $d_6$ ):  $\delta$  163.5 (d,  $J = 256.8$  Hz), 149.3, 144.5, 140.2, 134.1, 129.1 (d,  $J = 13.7$  Hz), 125.8 (d,  $J = 11.0$  Hz), 125.4, 120.4, 118.6 (d,  $J = 25.5$  Hz), 113.6, 100.9, 16.6.

**(4-Sulfonamidophenyl)hydrazone (9l)**: Yield: 320 mg (0.91 mmol, 91%) as a yellow solid, mp 217-219 °C. IR (nujol): 3344, 3289, 3247, 1534, 1346, 1327, 1146  $\text{cm}^{-1}$ :  $^1\text{H}$  NMR (400 MHz, DMSO- $d_6$ ):  $\delta$  10.0 (s, 1H), 8.46 (dd,  $J = 6.7, 3.0$  Hz, 1H), 8.26 (dt,  $J = 9.0, 3.7$  Hz, 1H), 7.70 (d,  $J = 8.5$  Hz, 2H), 7.57 (dd,  $J = 9.8, 9.0$  Hz, 1H), 7.31 (d,  $J = 8.6$  Hz, 2H), 7.11 (s, 2H), 2.35 (s, 3H);  $^{13}\text{C}$  NMR (100 MHz, DMSO- $d_6$ ):  $\delta$  163.5 (d,  $J = 259.0$  Hz), 148.3, 144.5, 139.0, 135.0, 129.3 (d,  $J = 13.7$  Hz), 127.7, 125.4 (d,  $J = 10.8$  Hz), 125.3 (d,  $J = 5.6$  Hz), 118.5 (d,  $J = 25.0$  Hz), 112.7, 16.6.

**4-(Carboxyphenyl)hydrazone (9m)**: Yield: 285 mg (0.90 mmol, 90%) as a pale orange solid, mp 328-330 °C (dec). IR (nujol): 3451-2478, 3270, 1530, 1344  $\text{cm}^{-1}$ :  $^1\text{H}$  NMR (400 MHz, DMSO- $d_6$ ):  $\delta$  12.3 (br s, 1H), 10.0 (s, 1H), 8.46 (dd,  $J = 6.7, 3.0$  Hz, 1H), 8.26 (dt,  $J = 9.0, 3.6$  Hz, 1H), 7.85 (d,  $J = 8.5$  Hz, 2H), 7.56 (t,  $J = 9.8$  Hz, 1H), 7.27 (d,  $J = 8.5$  Hz, 2H), 2.35 (s, 3H);  $^{13}\text{C}$  NMR (100 MHz, DMSO- $d_6$ ):  $\delta$  167.7, 163.5 (d,  $J = 257.5$  Hz), 149.4, 144.5, 138.9, 131.5, 129.3 (d,  $J = 13.7$  Hz), 125.5 (d,  $J = 10.7$  Hz), 125.3 (d,  $J = 5.7$  Hz), 121.8, 118.5 (d,  $J = 25.6$  Hz), 112.7, 16.5.

#### Characterization of arylhydrazones from 2-fluoro-5-nitrobenzaldehyde.

**Phenylhydrazone (10a)**: Yield: 246 mg (0.95 mmol, 95%) as an orange solid, mp 167-169 °C. IR (nujol): 3338, 1531, 1336  $\text{cm}^{-1}$ :  $^1\text{H}$  NMR (400 MHz, DMSO- $d_6$ ):  $\delta$  10.9 (s, 1H), 8.64 (dd,  $J = 6.6, 3.0$  Hz, 1H), 8.15 (dt,  $J = 9.2, 3.7$  Hz, 1H), 8.01 (s, 1H), 7.52 (t,  $J = 9.6$  Hz, 1H), 7.29 (t,  $J = 7.7$  Hz, 2H), 7.12 (d,  $J = 7.9$  Hz, 2H), 6.84 (t,  $J = 7.3$  Hz, 1H);  $^{13}\text{C}$  NMR (100 MHz, DMSO- $d_6$ ):  $\delta$  162.9 (d,  $J = 256.9$  Hz), 144.9, 144.8, 129.7, 126.8 (d,  $J = 3.7$  Hz), 125.4 (d,  $J = 12.8$  Hz), 124.4 (d,  $J = 10.2$  Hz), 120.8, 120.4, 117.9 (d,  $J = 23.9$  Hz), 112.8.

**(2-Methoxyphenyl)hydrazone (10b)**: Yield: 231 mg (0.80 mmol, 80%) as an orange solid, mp 194-196 °C. IR (nujol): 3300, 1527, 1344  $\text{cm}^{-1}$ :  $^1\text{H}$  NMR (400 MHz,  $\text{DMSO-}d_6$ ):  $\delta$  10.4 (s, 1H), 8.66 (dd,  $J = 6.3, 2.0$  Hz), 8.37 (s, 1H), 8.16 (dt,  $J = 8.7, 3.5$  Hz, 1H), 7.52 (t,  $J = 9.5$  Hz, 1H), 7.43 (d,  $J = 7.9$  Hz, 1H), 6.98 (d,  $J = 8.4$  Hz, 1H), 6.95 (t,  $J = 7.8$  Hz, 1H), 6.63 (t,  $J = 7.7$  Hz, 1H), 3.87 (s, 3H);  $^{13}\text{C}$  NMR (100 MHz,  $\text{DMSO-}d_6$ ):  $\delta$  162.8 (d,  $J = 257.7$  Hz), 145.9, 145.0, 134.0, 128.4 (d,  $J = 4.0$  Hz), 125.7 (d,  $J = 12.9$  Hz), 124.5 (d,  $J = 10.4$  Hz), 121.8, 120.8 (d,  $J = 6.0$  Hz), 120.3, 117.9 (d,  $J = 23.9$  Hz), 112.5, 111.6, 56.1.

**(3-Methoxyphenyl)hydrazone (10c)**: Yield: 237 mg (0.82 mmol, 82%) as an orange solid, mp 196-198 °C. IR (nujol): 3294, 1519, 1345  $\text{cm}^{-1}$ :  $^1\text{H}$  NMR (400 MHz,  $\text{DMSO-}d_6$ ):  $\delta$  10.9 (s, 1H), 8.65 (dd,  $J = 6.3, 3.0$  Hz, 1H), 8.16 (ddd,  $J = 8.9, 4.3, 1.8$  Hz, 1H), 8.00 (s, 1H), 7.53 (t,  $J = 9.5$  Hz, 1H), 7.18 (t,  $J = 8.0$  Hz, 1H), 6.71-6.65 (complex, 3H), 6.44 (dd,  $J = 8.1, 2.5$  Hz, 1H), 3.76 (s, 3H);  $^{13}\text{C}$  NMR (100 MHz,  $\text{DMSO-}d_6$ ):  $\delta$  162.7 (d,  $J = 257.9$  Hz), 160.8, 146.1, 145.0, 130.7, 127.0 (d,  $J = 3.7$  Hz), 125.4 (d,  $J = 12.7$  Hz), 124.6 (d,  $J = 10.5$  Hz), 121.0 (d,  $J = 6.0$  Hz), 118.0 (d,  $J = 23.8$  Hz), 105.8, 105.7, 98.7, 55.4.

**(4-Methoxyphenyl)hydrazone (10d)**: Yield: 260 mg (0.90 mmol, 90%) as an orange solid, mp 154-155 °C. IR (nujol): 3301, 1524, 1344  $\text{cm}^{-1}$ :  $^1\text{H}$  NMR (400 MHz,  $\text{DMSO-}d_6$ ):  $\delta$  10.8 (s, 1H), 8.63 (dd,  $J = 6.2, 3.0$  Hz), 8.12 (dt,  $J = 9.3, 3.7$  Hz, 1H), 7.93 (s, 1H), 7.51 (t,  $J = 9.6$  Hz, 1H), 7.06 (d,  $J = 8.5$  Hz, 2H), 6.90 (d,  $J = 8.5$  Hz, 2H), 3.71 (s, 3H);  $^{13}\text{C}$  NMR (100 MHz,  $\text{DMSO-}d_6$ ):  $\delta$  161.3 (d,  $J = 256.7$  Hz), 153.9, 145.0, 138.7, 125.7 (d,  $J = 12.7$  Hz), 125.3, 123.9 (d,  $J = 10.3$  Hz), 120.6 (d,  $J = 6.0$  Hz), 117.8 (d,  $J = 24.0$  Hz), 115.2, 113.9, 55.7.

**(4-Bromophenyl)hydrazone (10e)**: Yield: 317 mg (0.94 mmol, 94%) as an orange solid, mp 184-186 °C: IR (nujol): 3327, 1532, 1339  $\text{cm}^{-1}$ :  $^1\text{H}$  NMR (400 MHz,  $\text{DMSO-}d_6$ ):  $\delta$  11.0 (s, 1H), 8.64 (dd,  $J = 6.3, 2.9$  Hz, 1H), 8.18 (dt,  $J = 9.1, 3.8$  Hz, 1H), 8.01 (s, 1H), 7.53 (t,  $J = 9.5$  Hz, 1H), 7.43 (d,  $J = 8.4$  Hz, 2H), 7.07 (d,  $J = 8.4$  Hz, 2H);  $^{13}\text{C}$  NMR (100 MHz,  $\text{DMSO-}d_6$ ):  $\delta$  162.8 (d,  $J = 257.4$  Hz), 144.9, 144.1, 132.4, 127.9, 125.1 (d,  $J = 12.4$  Hz), 124.8 (d,  $J = 10.3$  Hz), 121.0 (d,  $J = 5.7$  Hz), 118.0 (d,  $J = 23.9$  Hz), 114.8, 111.3.

**(3-Chlorophenyl)hydrazone (10f)**: Yield: 264 mg (0.90 mmol, 90%) as an orange solid, mp 197-199 °C. IR (nujol): 3288, 1523, 1343  $\text{cm}^{-1}$ :  $^1\text{H}$  NMR (400 MHz,  $\text{DMSO-}d_6$ ):  $\delta$  11.0 (s, 1H), 8.65 (dd,  $J = 6.2, 3.0$  Hz, 1H), 8.18 (dt,  $J = 9.2, 3.5$  Hz, 1H), 8.02 (s, 1H), 7.53 (t,  $J = 9.5$  Hz, 1H), 7.28 (t,  $J = 8.0$  Hz, 1H), 7.12 (s, 1H), 7.02 (d,  $J = 8.1$  Hz, 1H), 6.66 (d,  $J = 7.3$  Hz, 1H);  $^{13}\text{C}$  NMR (100 MHz,  $\text{DMSO-}d_6$ ):  $\delta$  161.8 (d,  $J = 258.5$  Hz), 145.2, 143.9, 133.3, 130.3, 127.5 (d,  $J = 3.4$

Hz), 124.0 (d,  $J = 10.5$  Hz), 123.9 (d,  $J = 12.7$  Hz), 120.2 (d,  $J = 5.7$  Hz), 118.7, 116.9 (d,  $J = 24.0$  Hz), 111.1, 110.5.

**(4-Chlorophenyl)hydrazone (10g):** Yield: 270 mg (0.92 mmol, 92%) as an orange solid, mp 189-191 °C. IR (nujol): 3325, 1533, 1335  $\text{cm}^{-1}$ :  $^1\text{H}$  NMR (400 MHz,  $\text{DMSO-}d_6$ ):  $\delta$  11.0 (s, 1H), 8.64 (dd,  $J = 6.3, 3.1$  Hz, 1H), 8.17 (dt,  $J = 9.0, 3.8$  Hz, 1H), 8.00 (s, 1H), 7.53 (t,  $J = 9.5$  Hz, 1H), 7.31 (d,  $J = 8.4$  Hz, 2H), 7.11 (d,  $J = 8.4$  Hz, 2H);  $^{13}\text{C}$  NMR (100 MHz,  $\text{DMSO-}d_6$ ):  $\delta$  162.8 (d,  $J = 257.0$  Hz), 145.0, 143.7, 129.6, 127.8 (d,  $J = 3.6$  Hz), 125.1 (d,  $J = 12.7$  Hz), 124.8 (d,  $J = 11.2$  Hz), 123.7, 121.0 (d,  $J = 5.7$  Hz), 118.0 (d,  $J = 23.9$  Hz).

**(2,4-Dichlorophenyl)hydrazone (10h):** Yield: 307 mg (0.94 mmol, 94%) as a yellow solid, mp 198-200 °C. IR (nujol): 3297, 1530, 1343  $\text{cm}^{-1}$ :  $^1\text{H}$  NMR (400 MHz,  $\text{DMSO-}d_6$ ):  $\delta$  10.6 (s, 1H), 8.66 (dd,  $J = 6.3, 3.0$  Hz, 1H), 8.53 (s, 1H), 8.22 (dt,  $J = 9.1, 3.7$  Hz, 1H), 7.58 (d,  $J = 8.9$  Hz, 1H), 7.56 (t,  $J = 9.5$  Hz, 1H), 7.50 (d,  $J = 2.4$  Hz, 1H), 7.38 (dd,  $J = 8.9, 2.4$  Hz, 1H);  $^{13}\text{C}$  NMR (100 MHz,  $\text{DMSO-}d_6$ ):  $\delta$  163.2 (d,  $J = 258.2$  Hz), 145.0, 140.3, 131.8 (d,  $J = 4.1$  Hz), 129.2, 128.8, 125.5 (d,  $J = 10.5$  Hz), 14.8 (d,  $J = 12.6$  Hz), 123.8, 121.2 (d,  $J = 5.5$  Hz), 118 (d,  $J = 23.9$  Hz), 117.6, 115.9.

**(3-(Trifluoromethyl)phenyl)hydrazone (10i):** Yield: 286 mg (0.93 mmol, 93%) as a yellow solid, mp 182-183 °C. IR (nujol): 3299, 1530, 1347  $\text{cm}^{-1}$ :  $^1\text{H}$  NMR (400 MHz,  $\text{DMSO-}d_6$ ):  $\delta$  11.2 (s, 1H), 8.66 (dd,  $J = 6.3, 2.9$  Hz, 1H), 8.20 (ddd,  $J = 9.1, 4.4, 2.9$  Hz, 1H), 8.06 (s, 1H), 7.55 (t,  $J = 9.9$  Hz, 1H), 7.50 (t,  $J = 7.8$  Hz, 1H), 7.37 (d,  $J = 7.8$  Hz, 1H), 7.34 (s, 1H), 7.15 (d,  $J = 8.0$  Hz, 1H);  $^{13}\text{C}$  NMR (100 MHz,  $\text{DMSO-}d_6$ ):  $\delta$  162.9 (d,  $J = 258.7$  Hz), 145.5, 145.0, 131.0, 130.5 (q,  $J = 31.2$  Hz), 129.1 (d,  $J = 3.4$  Hz), 125.9 (d,  $J = 10.2$  Hz), 124.9 (d,  $J = 12.6$  Hz), 124.7 (q,  $J = 272.3$  Hz), 121.4 (d,  $J = 5.6$  Hz), 117.9 (d,  $J = 24.0$  Hz), 116.5, 116.2 (q,  $J = 3.8$  Hz), 108.6 (q,  $J = 3.8$  Hz).

**(4-(Trifluoromethyl)phenyl)hydrazone (10j):** Yield: 286 mg (0.93 mmol, 93%) as a yellow solid, mp 203-204 °C. IR (nujol): 3290, 1517, 1342  $\text{cm}^{-1}$ :  $^1\text{H}$  NMR (400 MHz,  $\text{DMSO-}d_6$ ):  $\delta$  11.3 (s, 1H), 8.67 (dd,  $J = 6.2, 3.0$  Hz, 1H), 8.21 (dt,  $J = 9.1, 3.8$  Hz, 1H), 8.10 (s, 1H), 7.61 (d,  $J = 8.4$  Hz, 2H), 7.56 (t,  $J = 9.5$  Hz, 1H), 7.24 (d,  $J = 8.4$  Hz, 2H);  $^{13}\text{C}$  NMR (100 MHz,  $\text{DMSO-}d_6$ ):  $\delta$  163.0 (d,  $J = 258.4$  Hz), 147.9, 145.0, 129.7 (d,  $J = 3.4$  Hz), 127.2 (q,  $J = 3.9$  Hz), 125.3 (d,  $J = 10.3$  Hz), 125.3 (q,  $J = 270.6$  Hz), 124.8 (d,  $J = 12.7$  Hz), 121.3 (d,  $J = 5.5$  Hz), 120.1 (q,  $J = 32.0$  Hz), 118.1 (d,  $J = 23.9$  Hz), 112.7.

**(4-Cyanophenyl)hydrazone (10k):** Yield: 261 mg (0.92 mmol, 92%) as a yellow solid, mp 223-

225 °C. IR (nujol): 3283, 2209, 1519, 1345  $\text{cm}^{-1}$ :  $^1\text{H}$  NMR (400 MHz,  $\text{DMSO-}d_6$ ):  $\delta$  11.4 (s, 1H), 8.67 (dd,  $J = 6.3, 3.0$  Hz, 1H), 8.28 (dt,  $J = 9.2, 3.7$  Hz, 1H), 8.12 (s, 1H), 7.69 (d,  $J = 8.4$  Hz, 2H), 7.57 (t,  $J = 9.5$  Hz, 1H), 7.21 (d,  $J = 8.4$  Hz, 2H);  $^{13}\text{C}$  NMR (100 MHz,  $\text{DMSO-}d_6$ ):  $\delta$  163.1 (d,  $J = 258.5$  Hz), 148.2, 144.9, 134.2, 130.7, 125.6 (d,  $J = 10.5$  Hz), 124.6 (d,  $J = 12.5$  Hz), 121.4 (d,  $J = 5.5$  Hz), 120.3, 118.1 (d,  $J = 24.0$  Hz), 113.0, 101.1.

**(4-Sulfonamidophenyl)hydrazone (10l)**: Yield: 306 mg (0.90 mmol, 90%) as a yellow solid, mp 279-280 °C. IR (nujol): 3350, 3344, 3250, 1518, 1346, 1320, 1145  $\text{cm}^{-1}$ :  $^1\text{H}$  NMR (400 MHz,  $\text{DMSO-}d_6$ ):  $\delta$  11.3 (s, 1H), 8.69 (dd,  $J = 6.2, 3.0$  Hz, 1H), 8.22 (dt,  $J = 9.1, 3.8$  Hz, 1H), 8.11 (s, 1H), 7.73 (d,  $J = 8.4$  Hz, 2H), 7.57 (t,  $J = 9.5$  Hz, 1H), 7.21 (d,  $J = 8.4$  Hz, 2H), 7.14 (s, 2H);  $^{13}\text{C}$  NMR (100 MHz,  $\text{DMSO-}d_6$ ):  $\delta$  163.0 (d,  $J = 258.4$  Hz), 147.3, 145.0, 135.2, 129.8, 128.1, 125.4 (d,  $J = 10.2$  Hz), 124.8 (d,  $J = 12.6$  Hz), 121.1 (d,  $J = 5.7$  Hz), 118.1 (d,  $J = 24.1$  Hz), 112.2.

**4-(Carboxyphenyl)hydrazone (10m)**: Yield: 297 mg (0.98 mmol, 98%) as a yellow solid, mp 284-285 °C (dec). IR (nujol): 3458-2294, 3367, 1683, 1535, 1347  $\text{cm}^{-1}$ :  $^1\text{H}$  NMR (400 MHz,  $\text{DMSO-}d_6$ ):  $\delta$  12.4 (br s, 1H), 11.3 (s, 1H), 8.68 (dd,  $J = 6.2, 3.0$  Hz, 1H), 8.21 (dt,  $J = 9.1, 3.8$  Hz, 1H), 8.11 (s, 1H), 7.88 (d,  $J = 8.4$  Hz, 2H), 7.56 (t,  $J = 9.5$  Hz, 1H), 7.16 (d,  $J = 8.4$  Hz, 2H);  $^{13}\text{C}$  NMR (100 MHz,  $\text{DMSO-}d_6$ ):  $\delta$  167.6, 163.0 (d,  $J = 258.6$  Hz), 148.4, 145.0, 131.8, 129.7, 125.3 (d,  $J = 10.6$  Hz), 124.9 (d,  $J = 12.6$  Hz), 122.0, 121.3 (d,  $J = 5.6$  Hz), 118.1 (d,  $J = 24.1$  Hz), 112.2.

$^1\text{H}$  Spectrum of phenylhydrazone **9a**

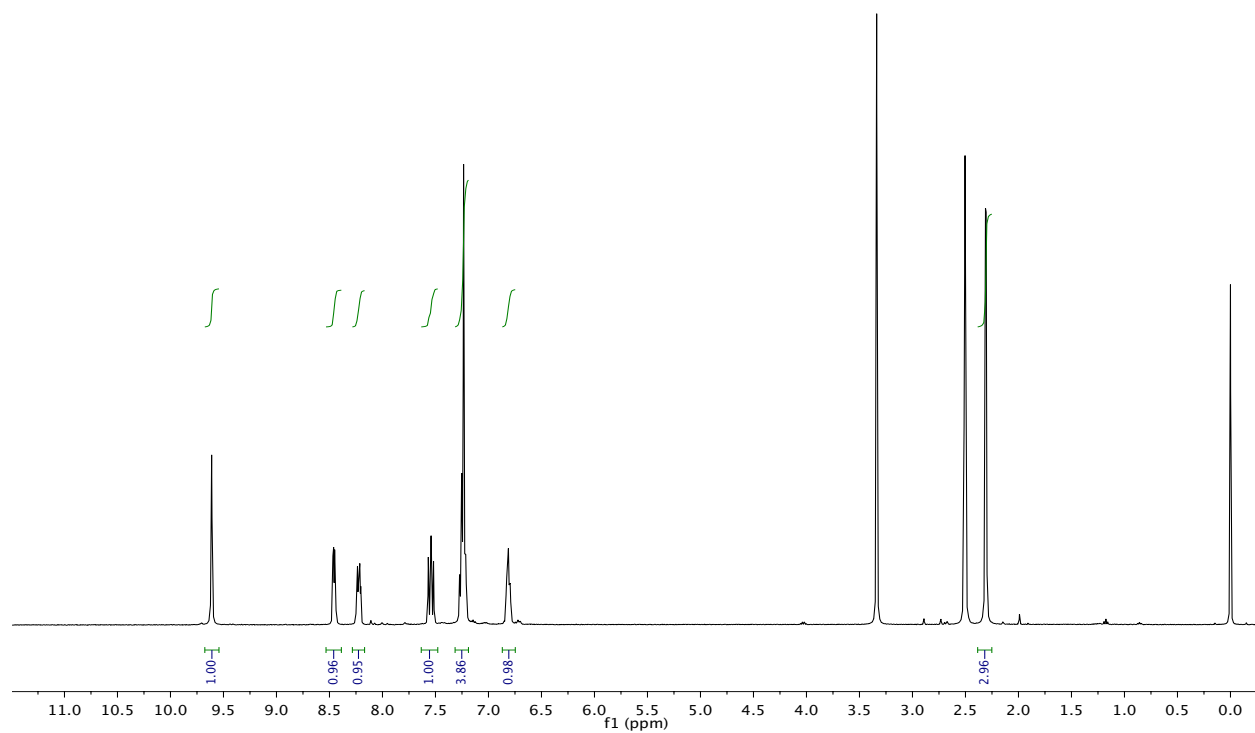

$^{13}\text{C}$  Spectrum of phenylhydrazone **9a**

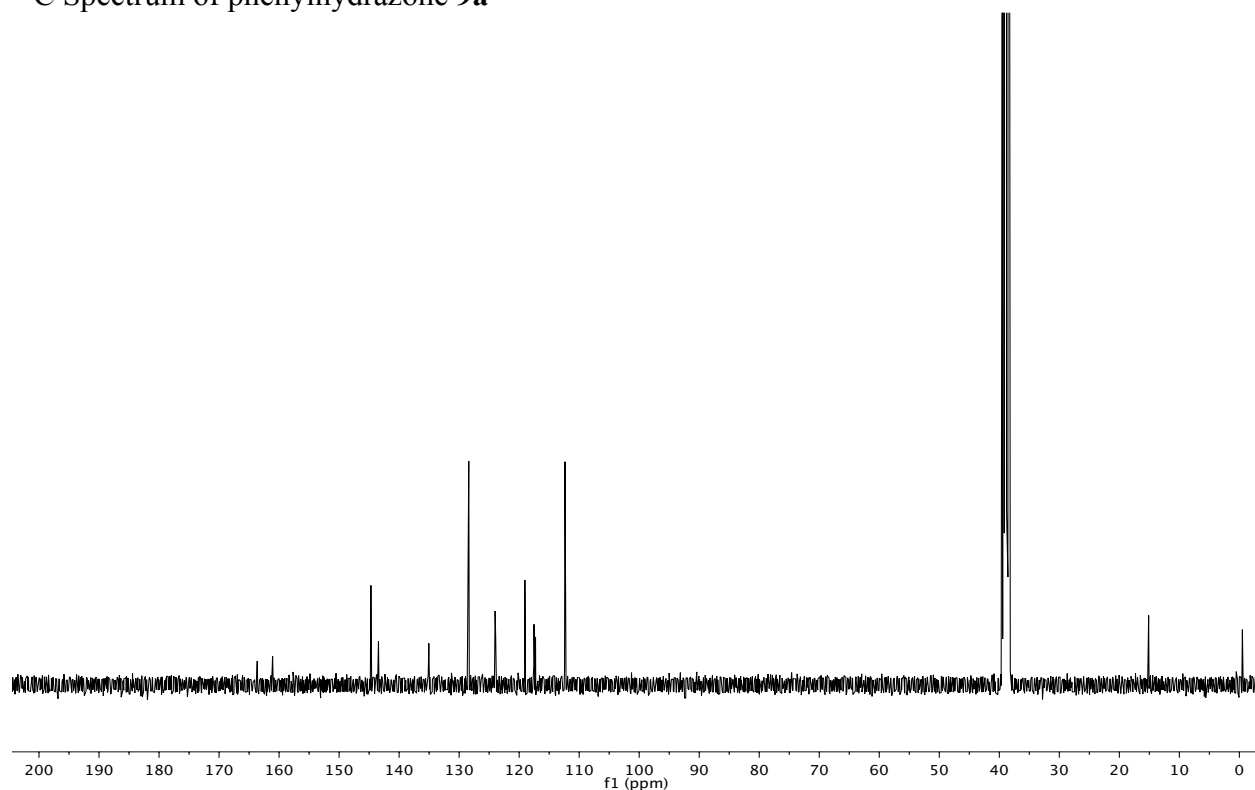

<sup>1</sup>H Spectrum of (2-methoxyphenyl)hydrazone **9b**

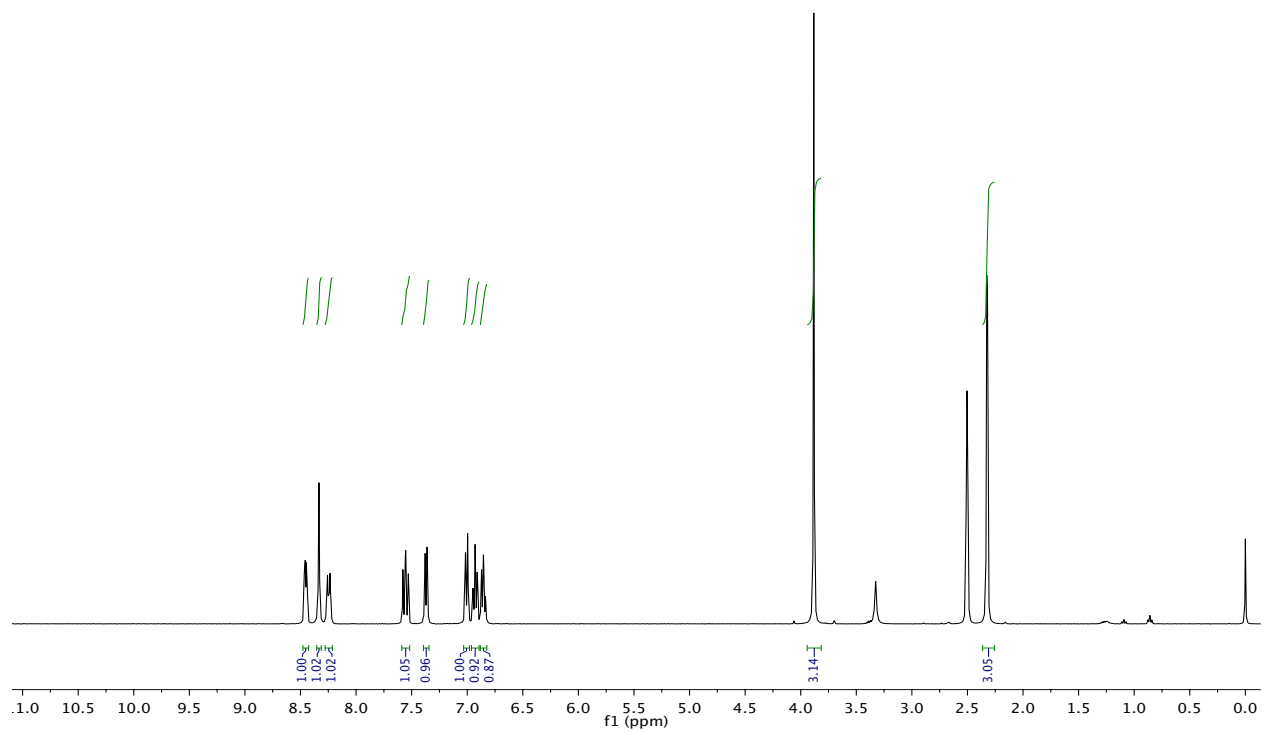

<sup>13</sup>C Spectrum of (2-methoxyphenyl)hydrazone **9b**

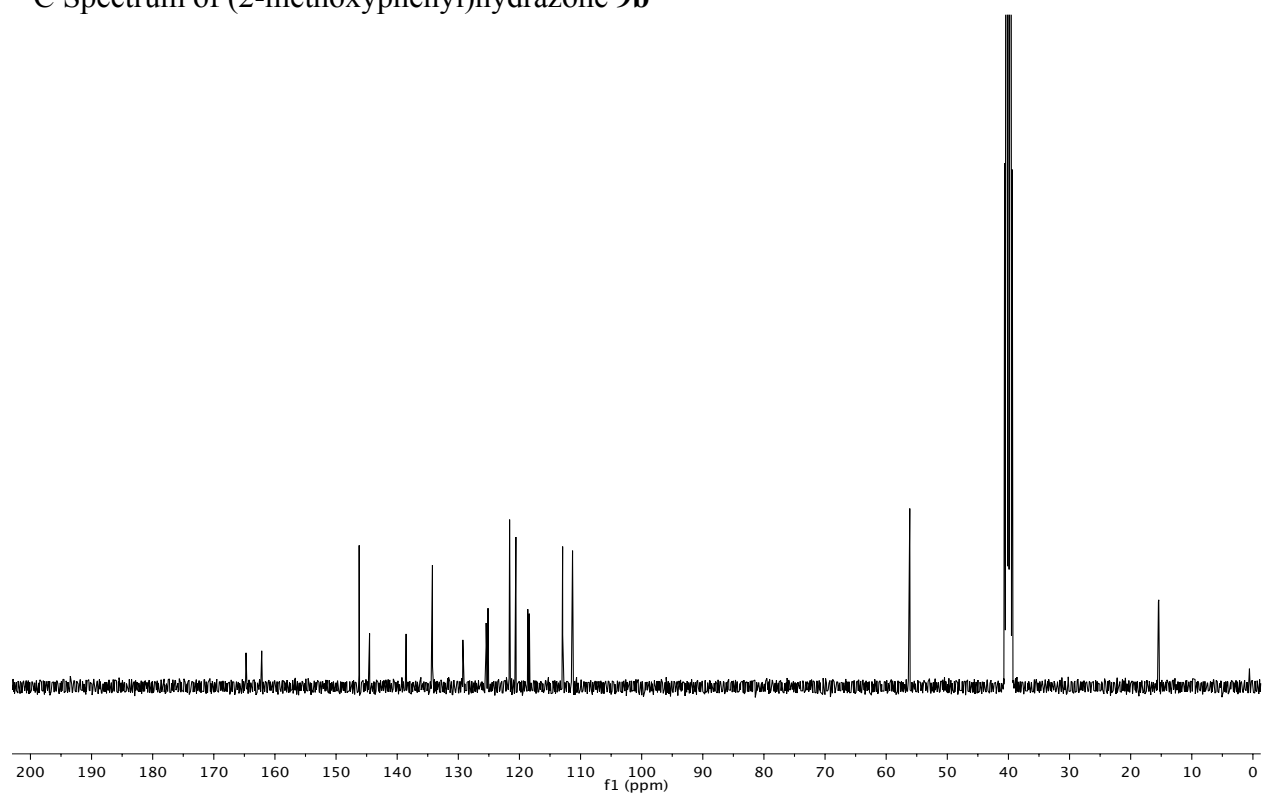

$^{13}\text{C}$  Spectrum of (3-methoxyphenyl)hydrazone **9c**

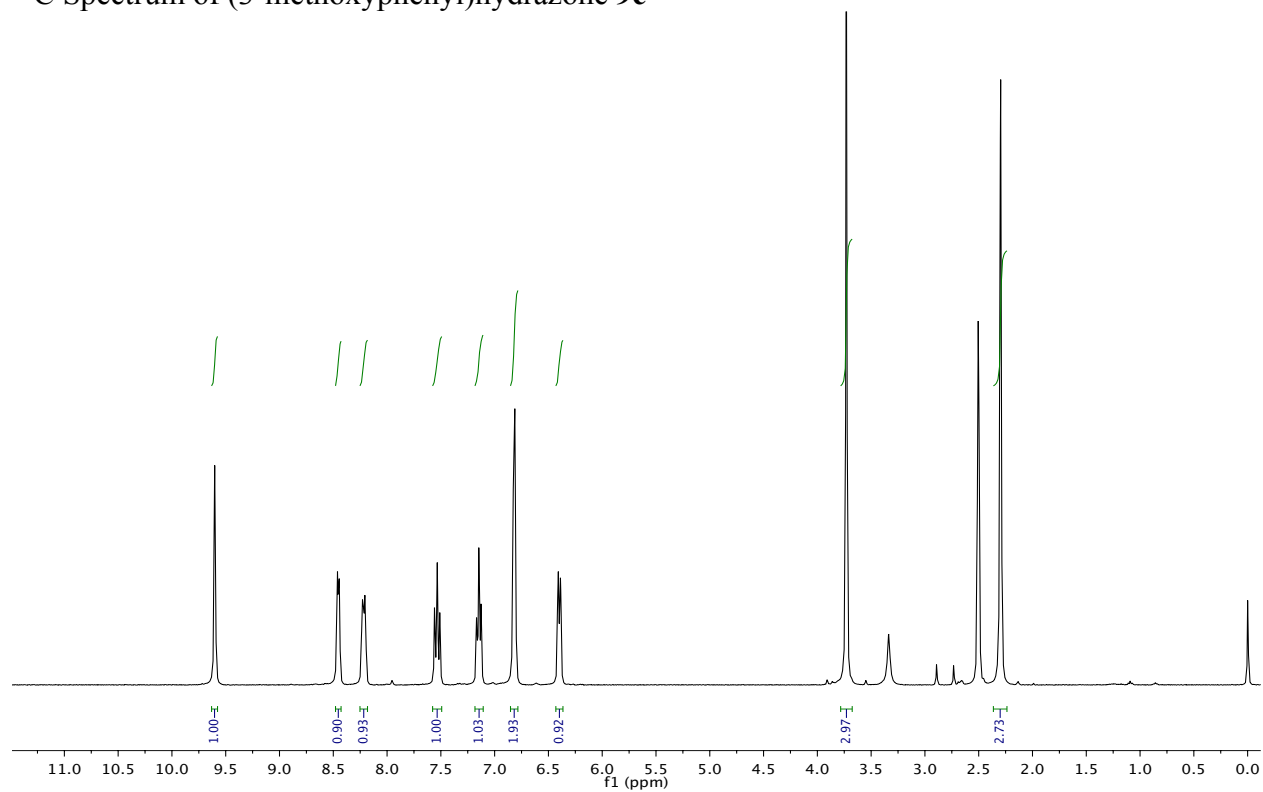

$^{13}\text{C}$  Spectrum of (3-methoxyphenyl)hydrazone **9c**

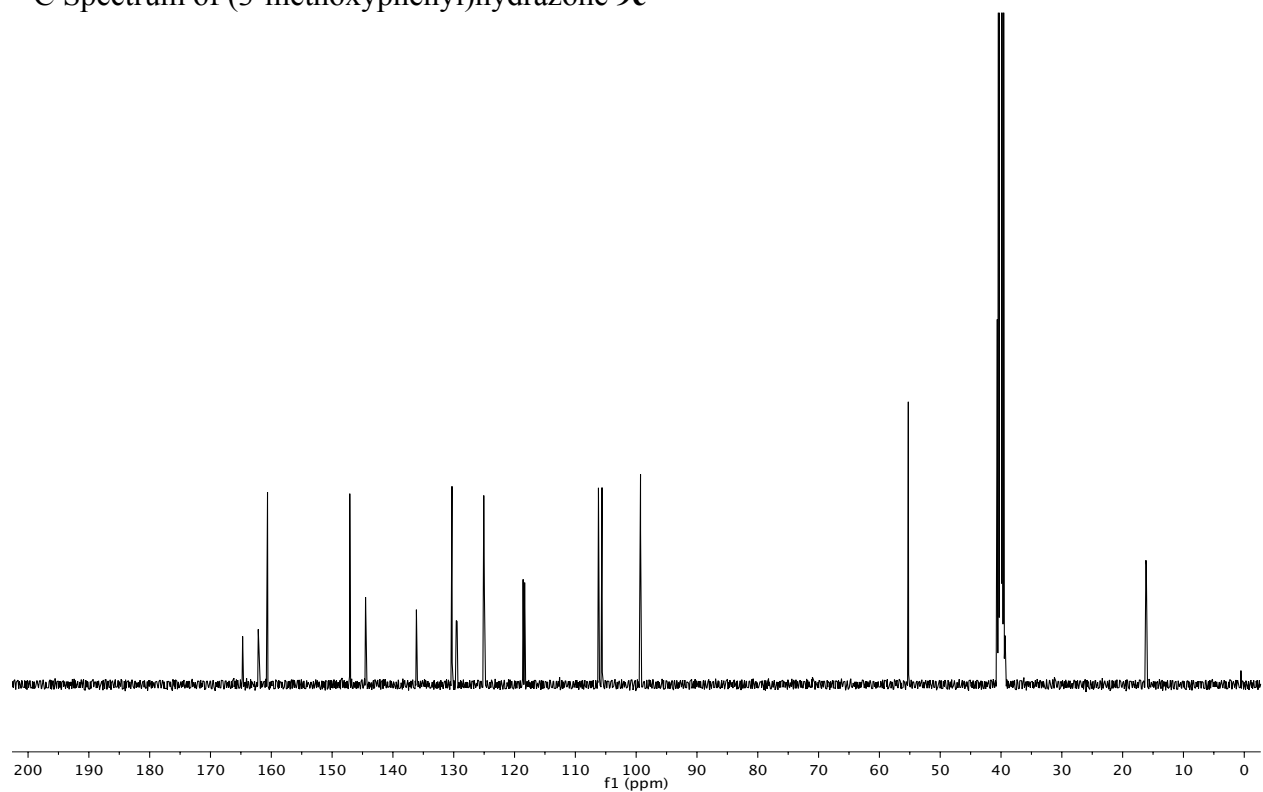

$^{13}\text{C}$  Spectrum of (4-methoxyphenyl)hydrazone **9d** (*E* and *Z*)

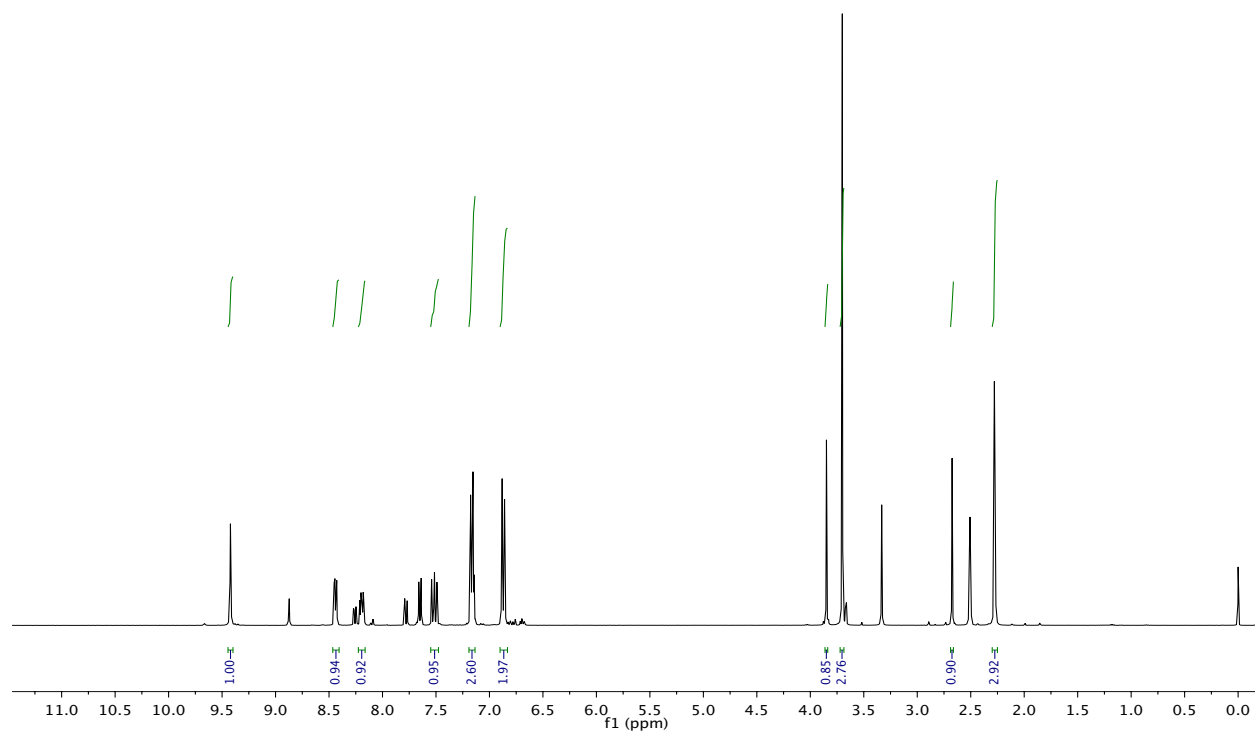

$^{13}\text{C}$  Spectrum of (4-methoxyphenyl)hydrazone **9d** (*E* and *Z*)

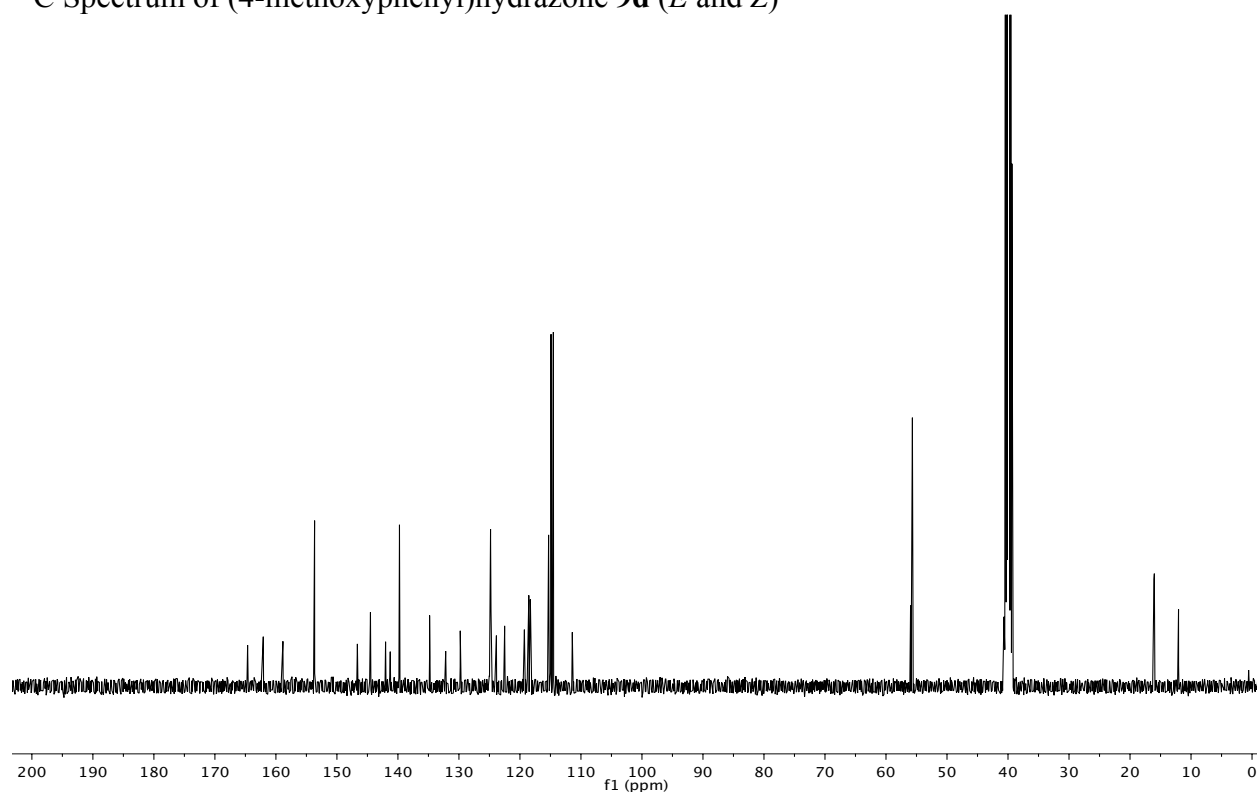



<sup>1</sup>H Spectrum of (4-bromophenyl)hydrazone **9e**

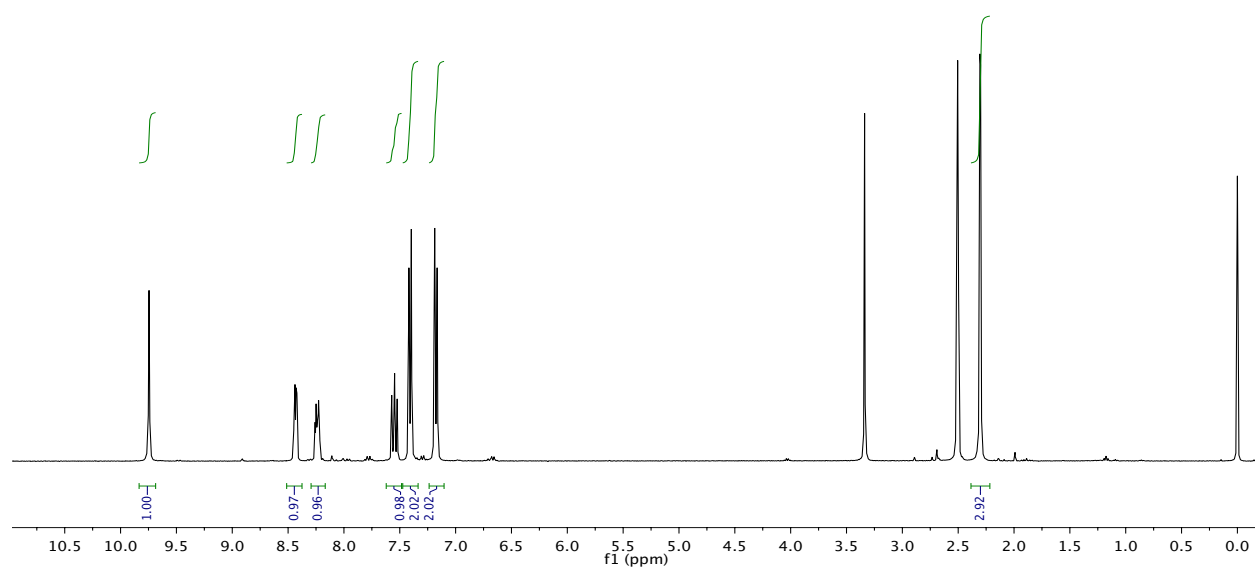

<sup>13</sup>C Spectrum of (4-bromophenyl)hydrazone **9e**

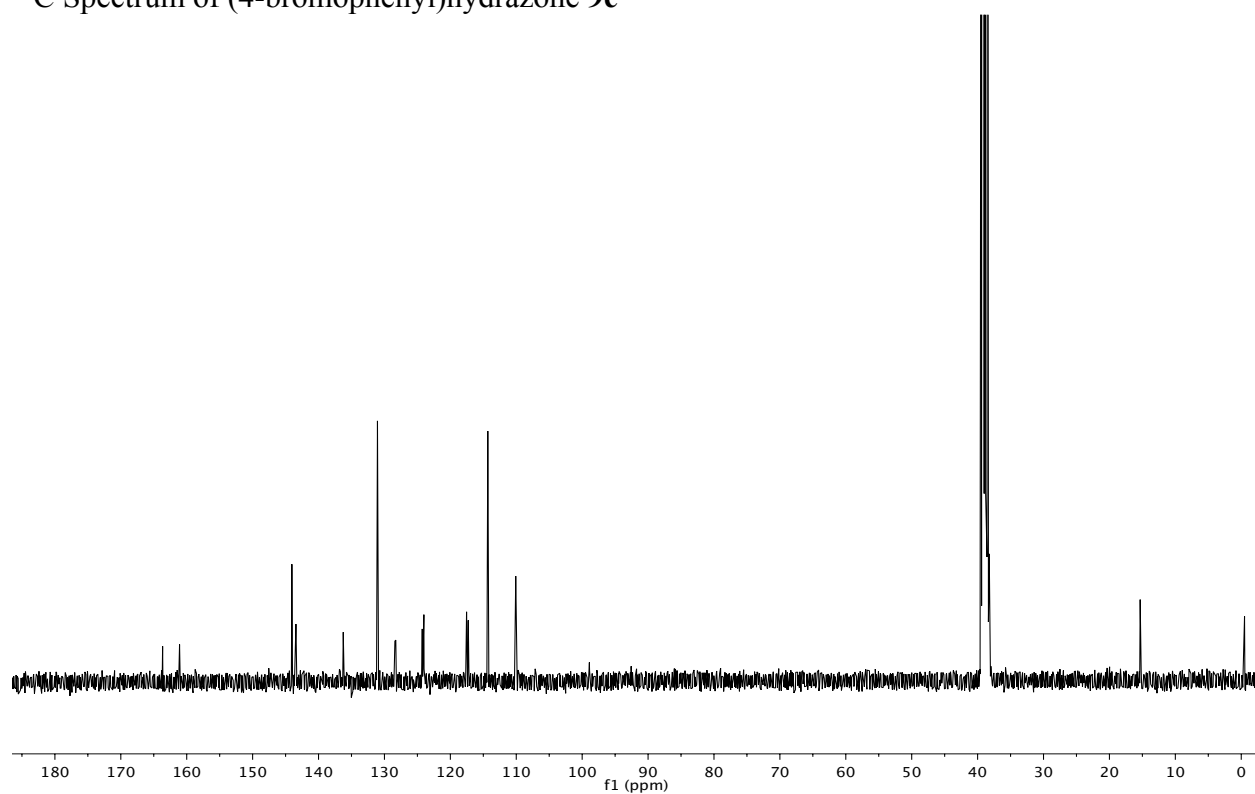

$^1\text{H}$  Spectrum of (3-chlorophenyl)hydrazone **9f**

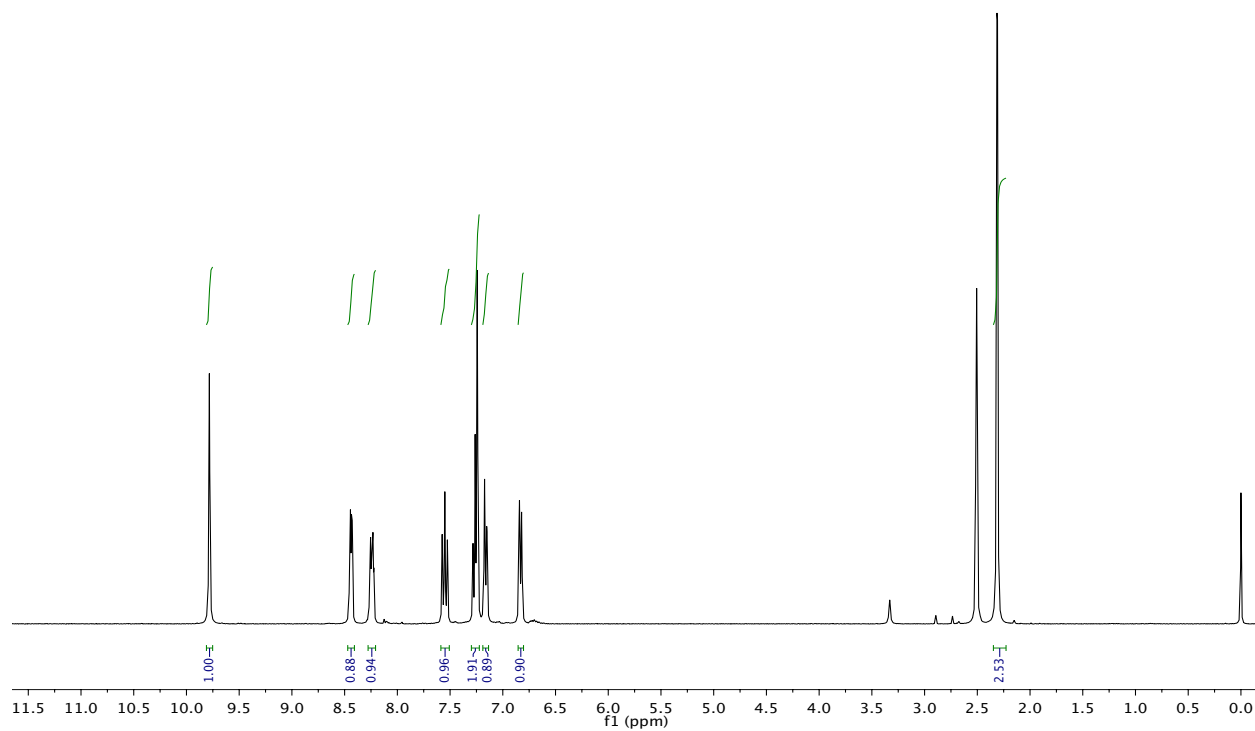

$^{13}\text{C}$  Spectrum of (3-chlorophenyl)hydrazone **9f**

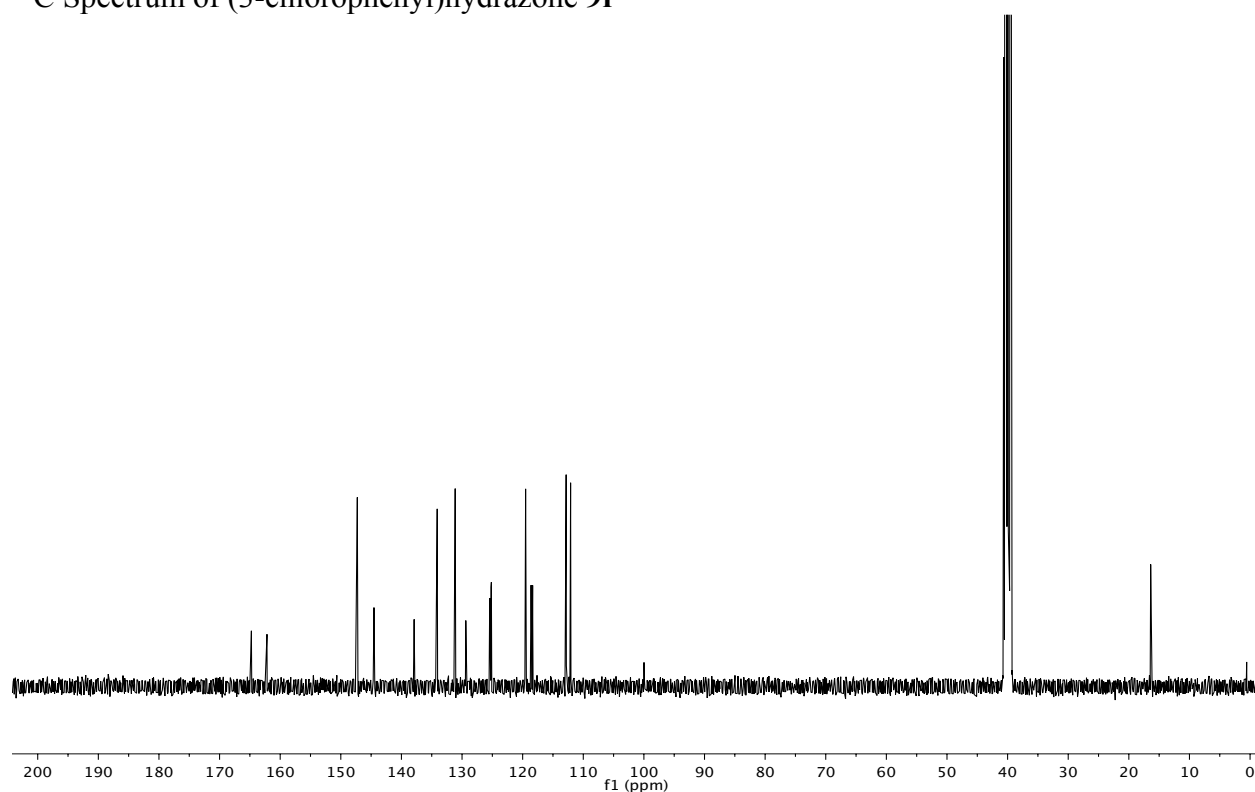

<sup>1</sup>H Spectrum of (4-chlorophenyl)hydrazone **9g**

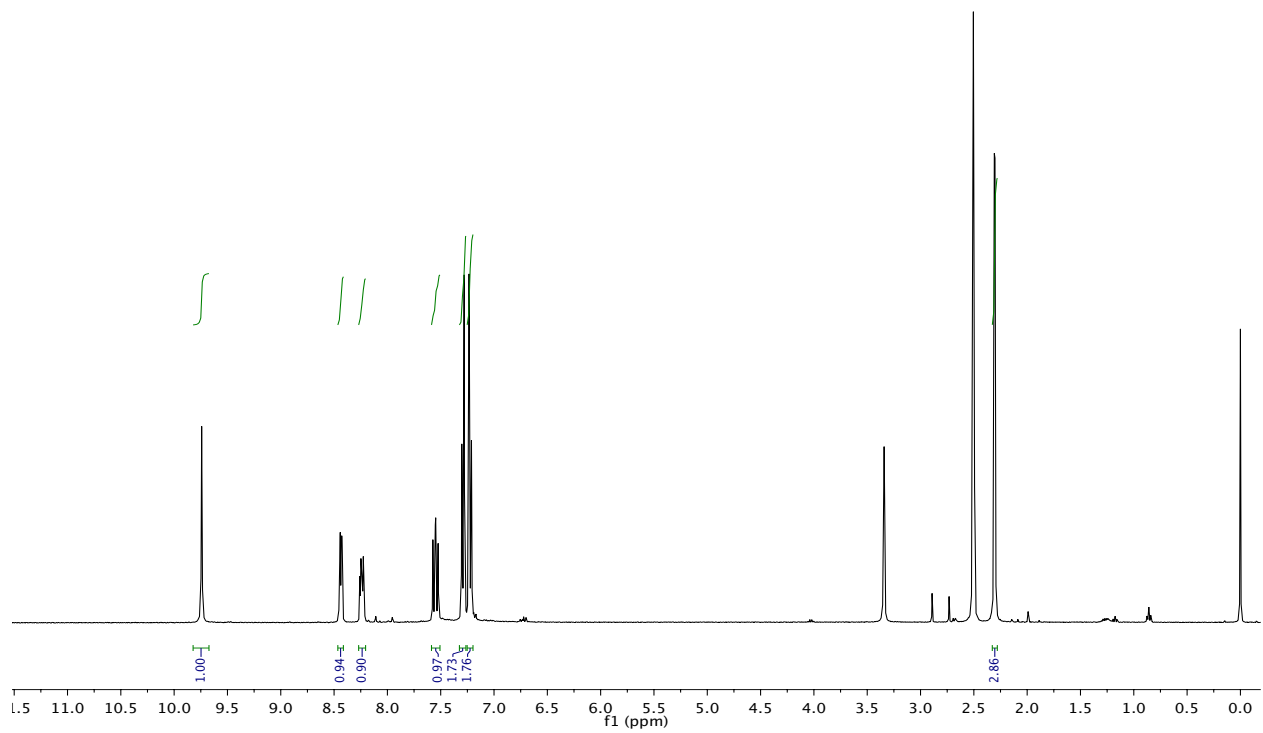

<sup>13</sup>C Spectrum of (4-chlorophenyl)hydrazone **9g**

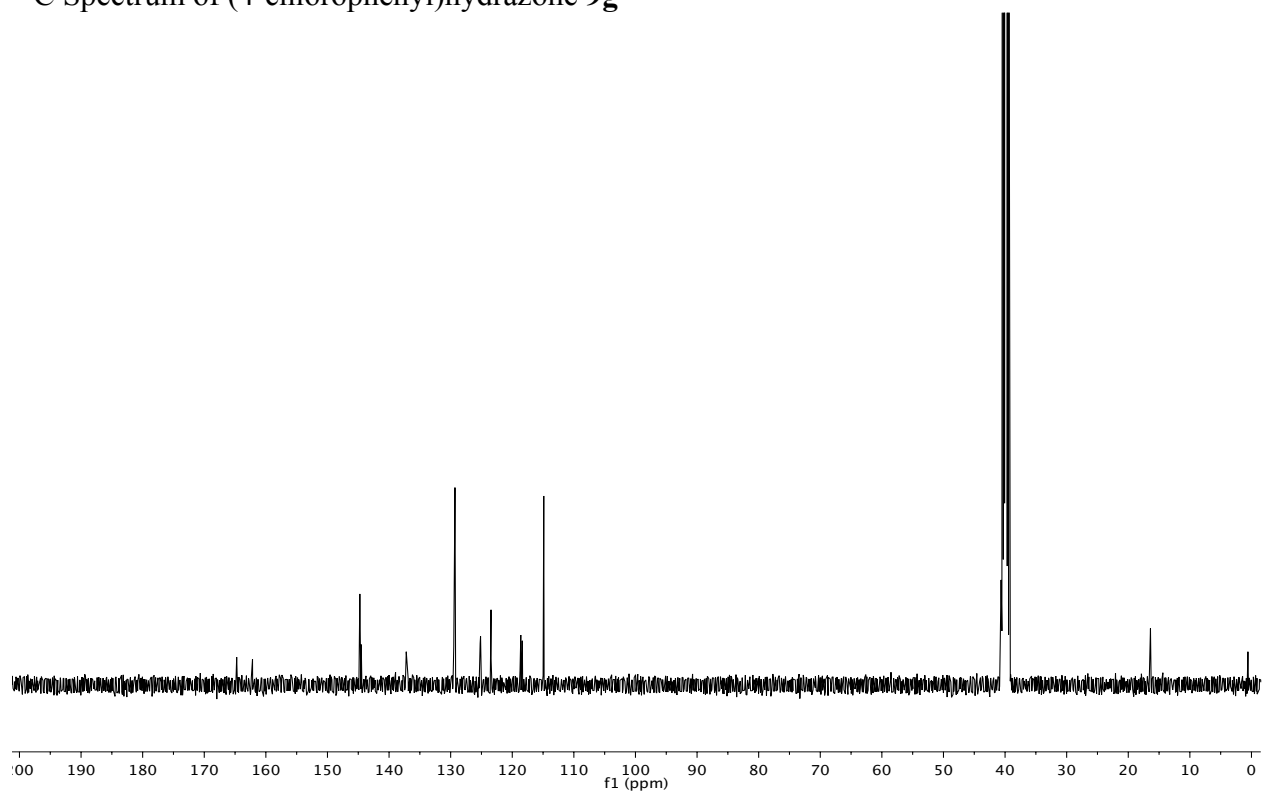

<sup>1</sup>H Spectrum of (2,4-dichlorophenyl)hydrazone **9h**

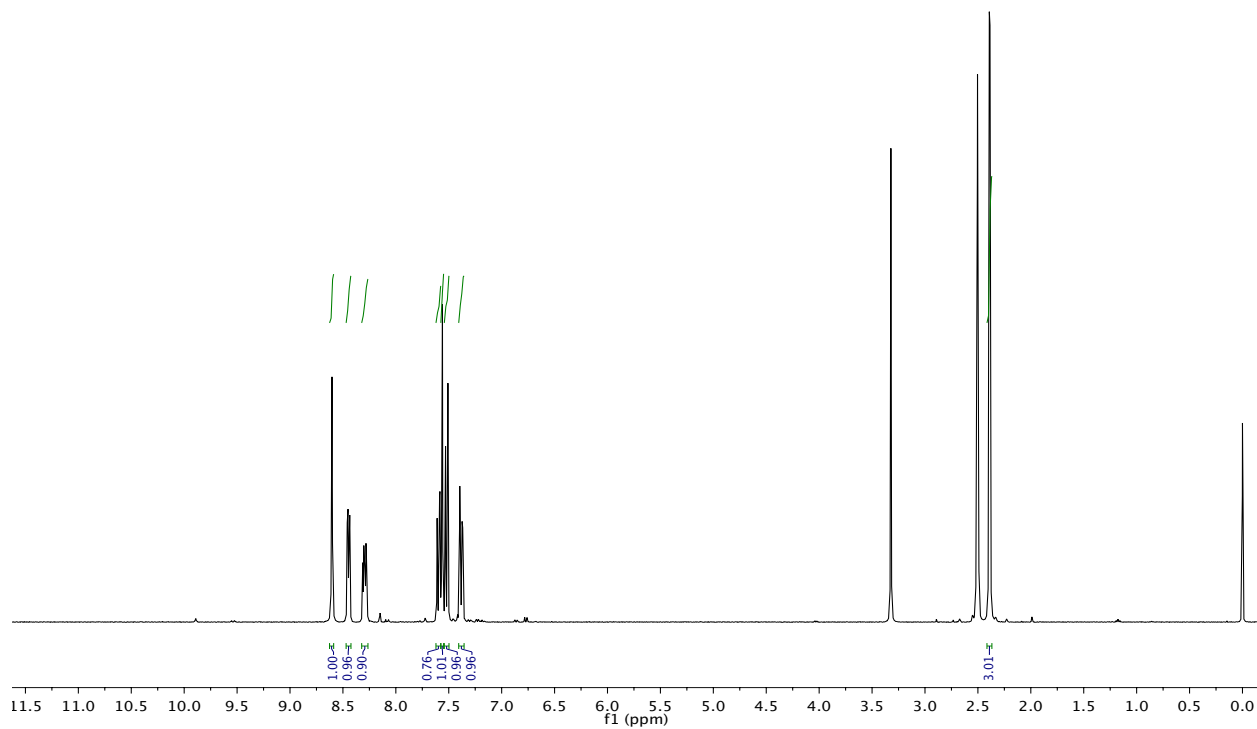

<sup>13</sup>C Spectrum of (2,4-dichlorophenyl)hydrazone **9h**

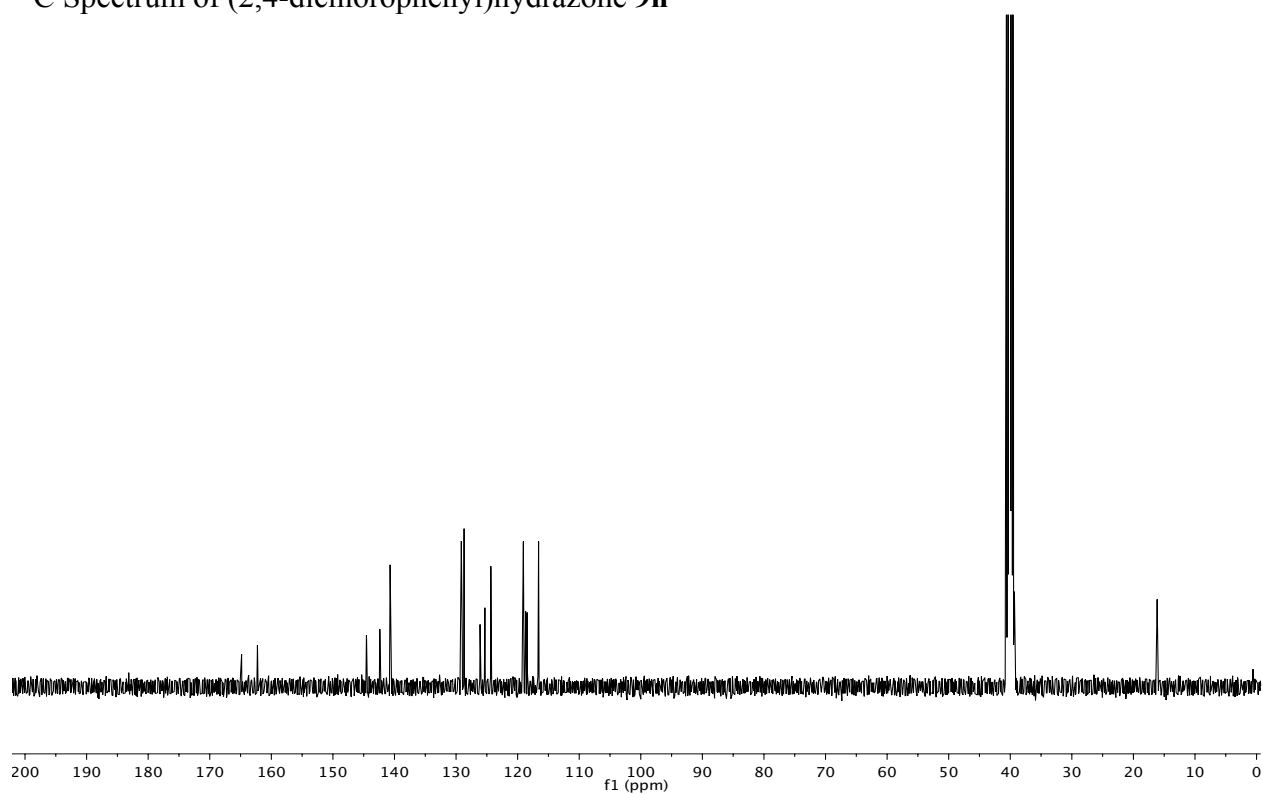

<sup>1</sup>H Spectrum of (3-(trifluoromethyl)phenyl)hydrazone **9i**

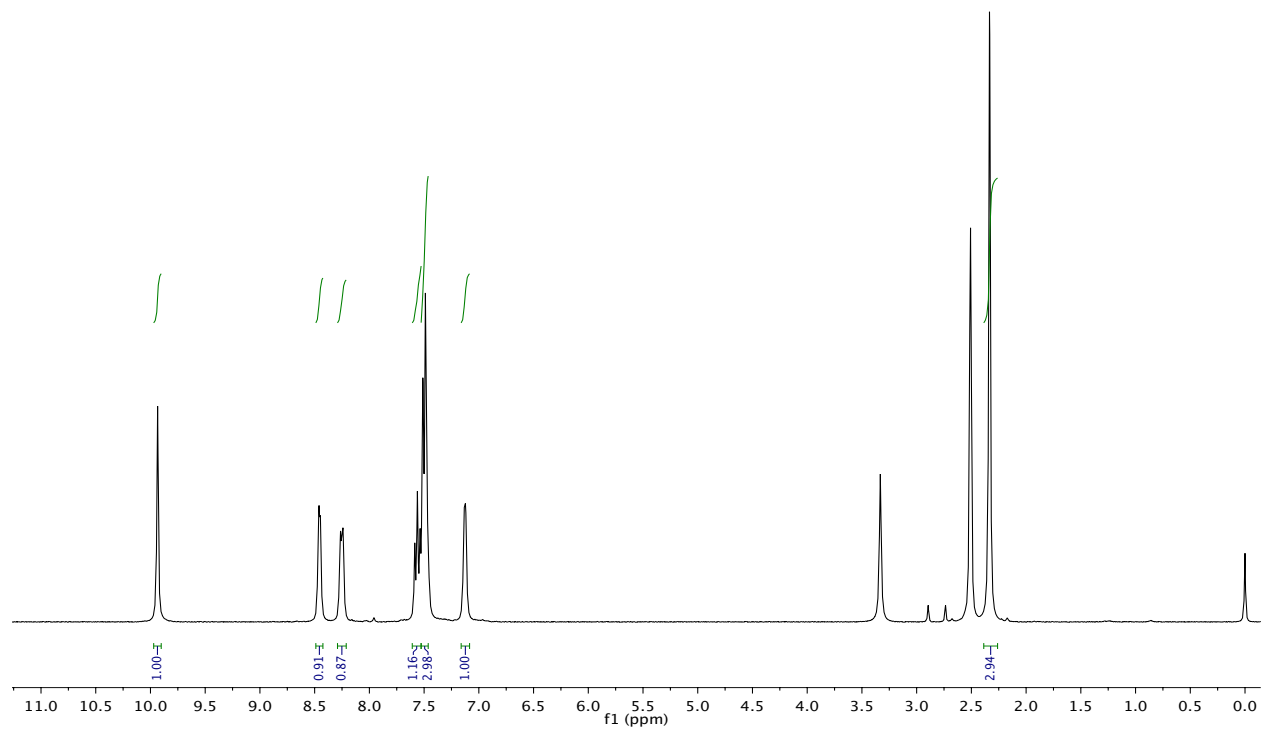

<sup>13</sup>C Spectrum of (3-(trifluoromethyl)phenyl)hydrazone **9i**

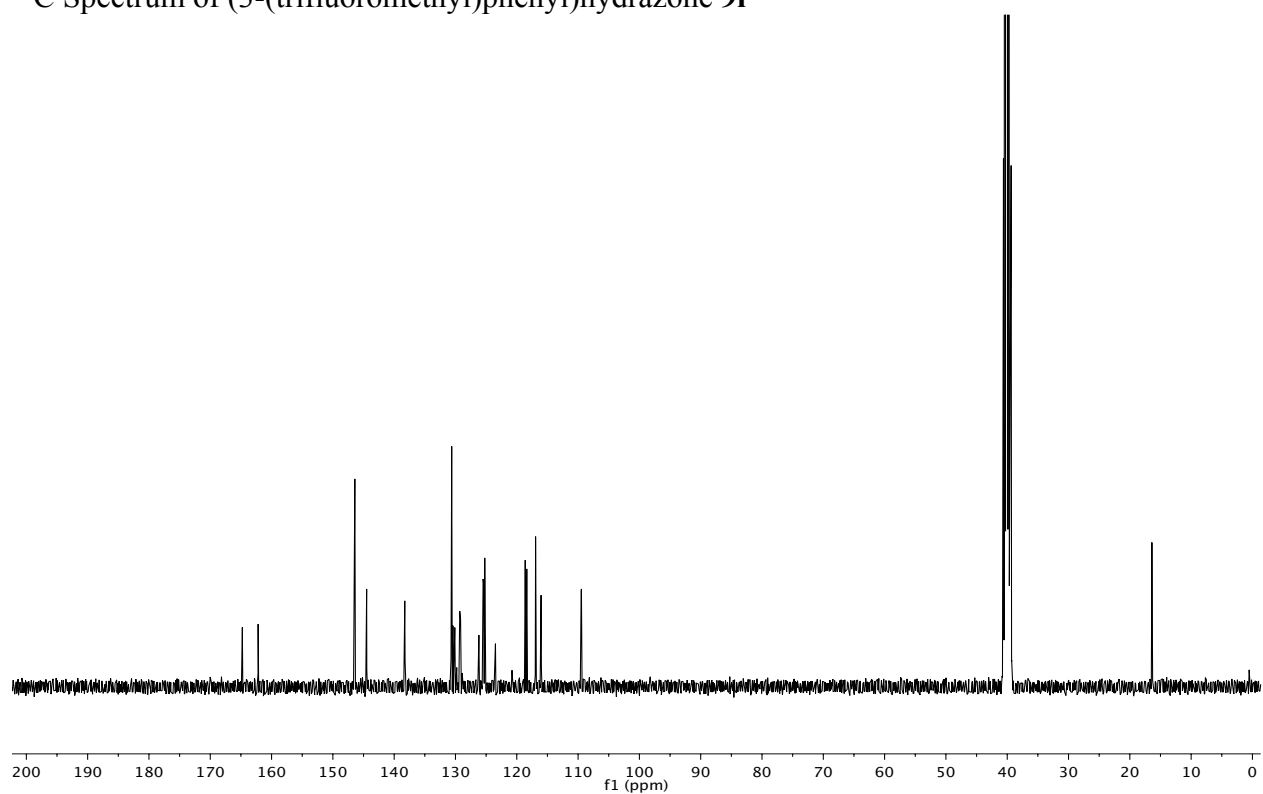

<sup>1</sup>H Spectrum of (4-(trifluoromethyl)phenyl)hydrazone **9j**

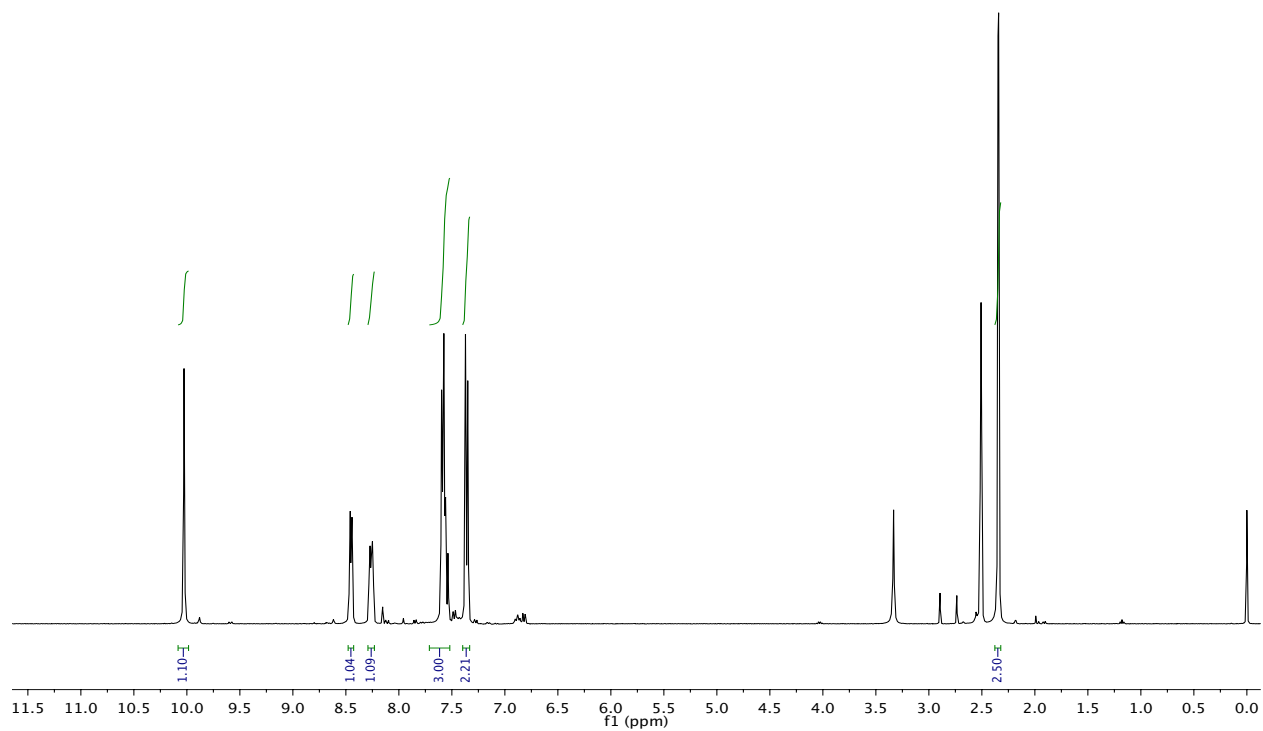

<sup>13</sup>C Spectrum of (4-(trifluoromethyl)phenyl)hydrazone **9j**

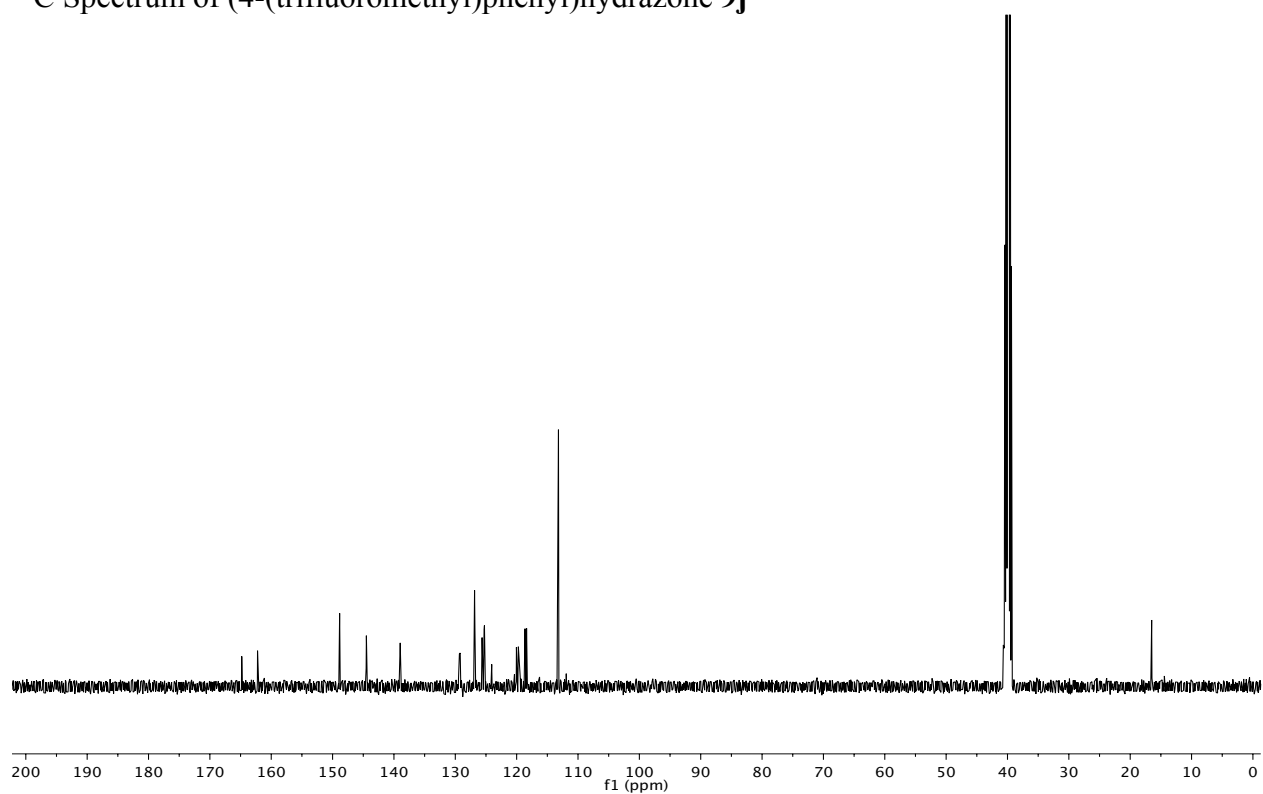

<sup>1</sup>H Spectrum of (4-cyanophenyl)hydrazone **9k**

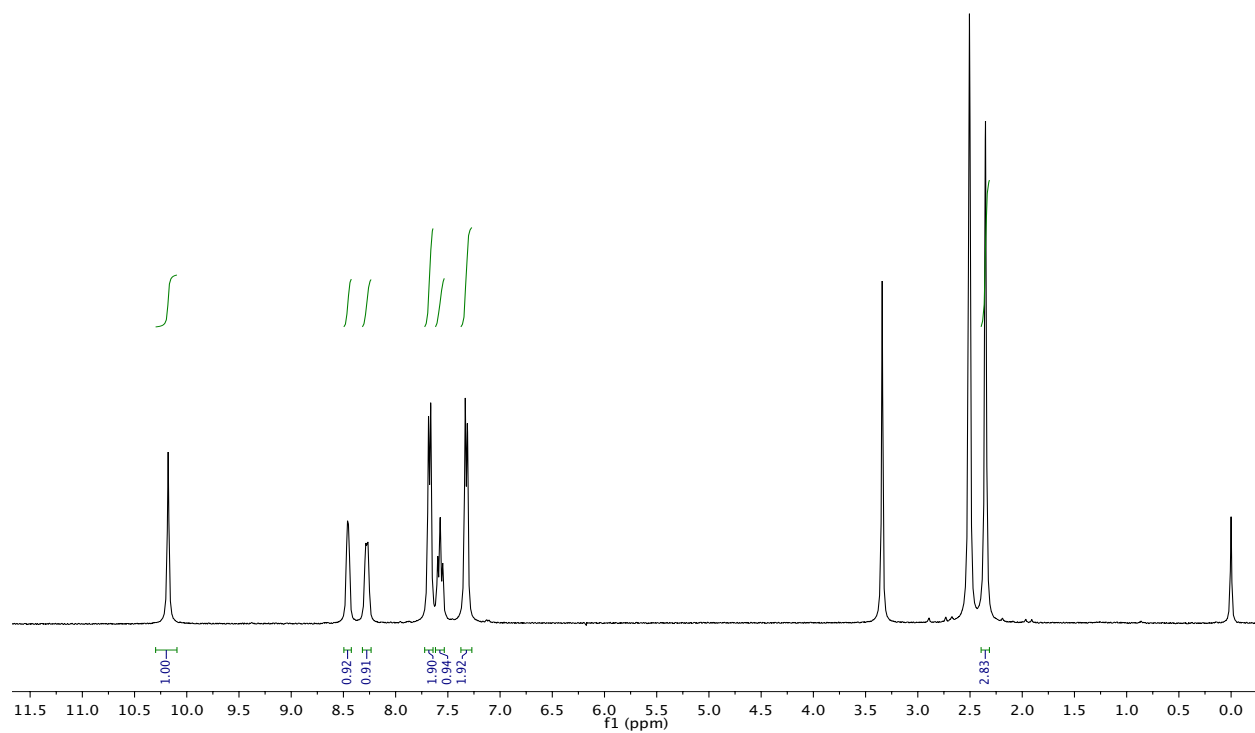

<sup>13</sup>C Spectrum of (4-cyanophenyl)hydrazone **9k**

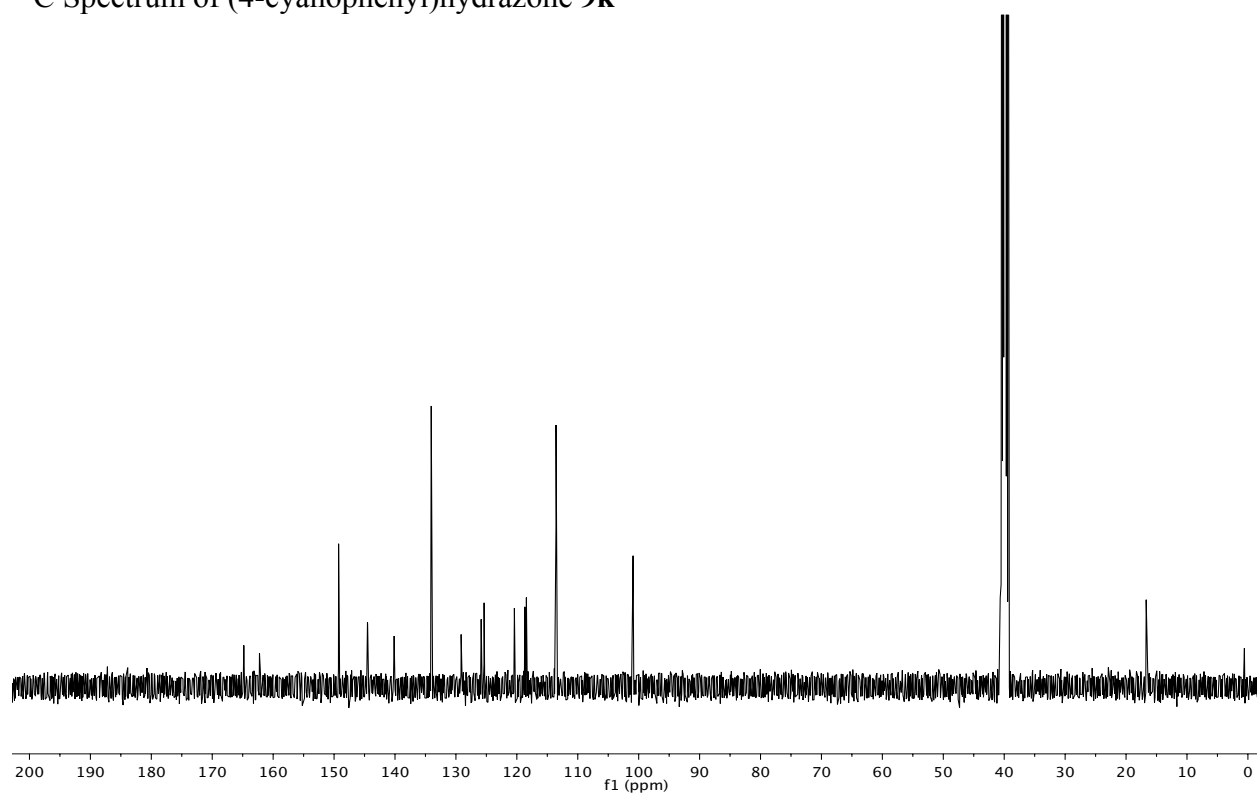

$^{13}\text{C}$  Spectrum of (4-sulfonamidophenyl)hydrazone **91**

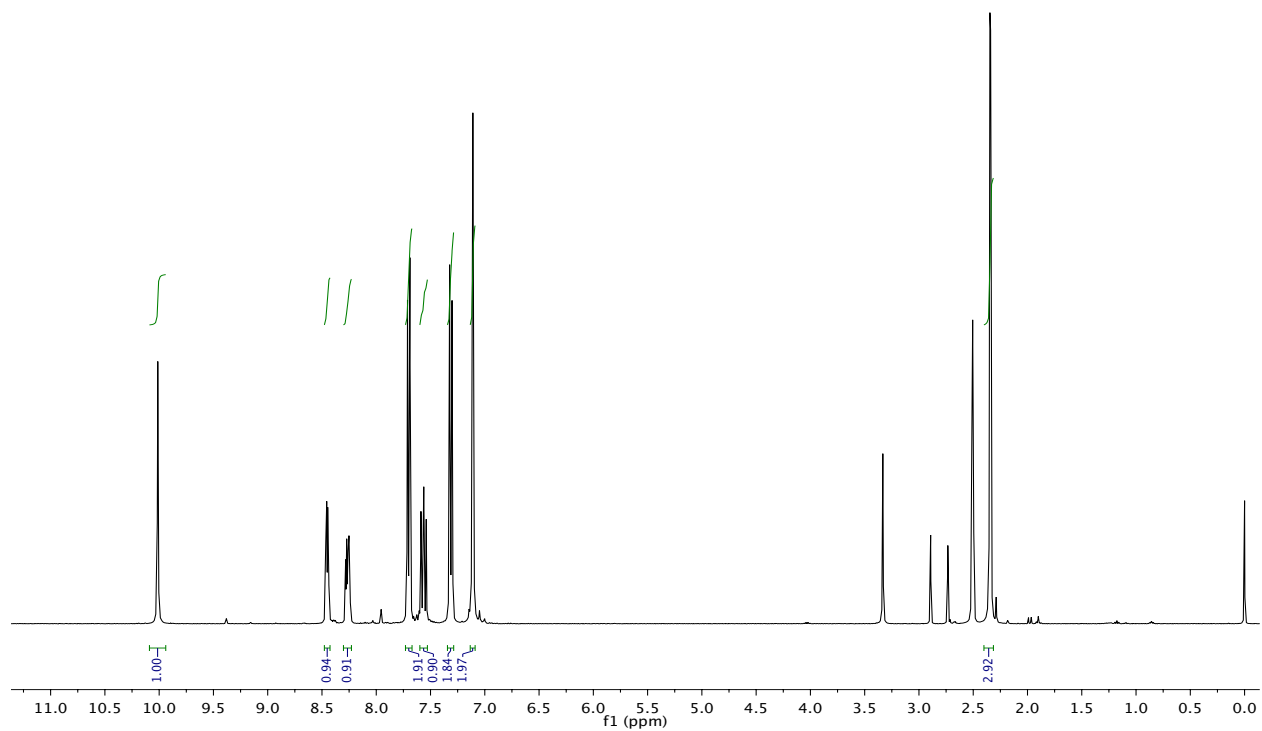

$^{13}\text{C}$  Spectrum of (4-sulfonamidophenyl)hydrazone **91**

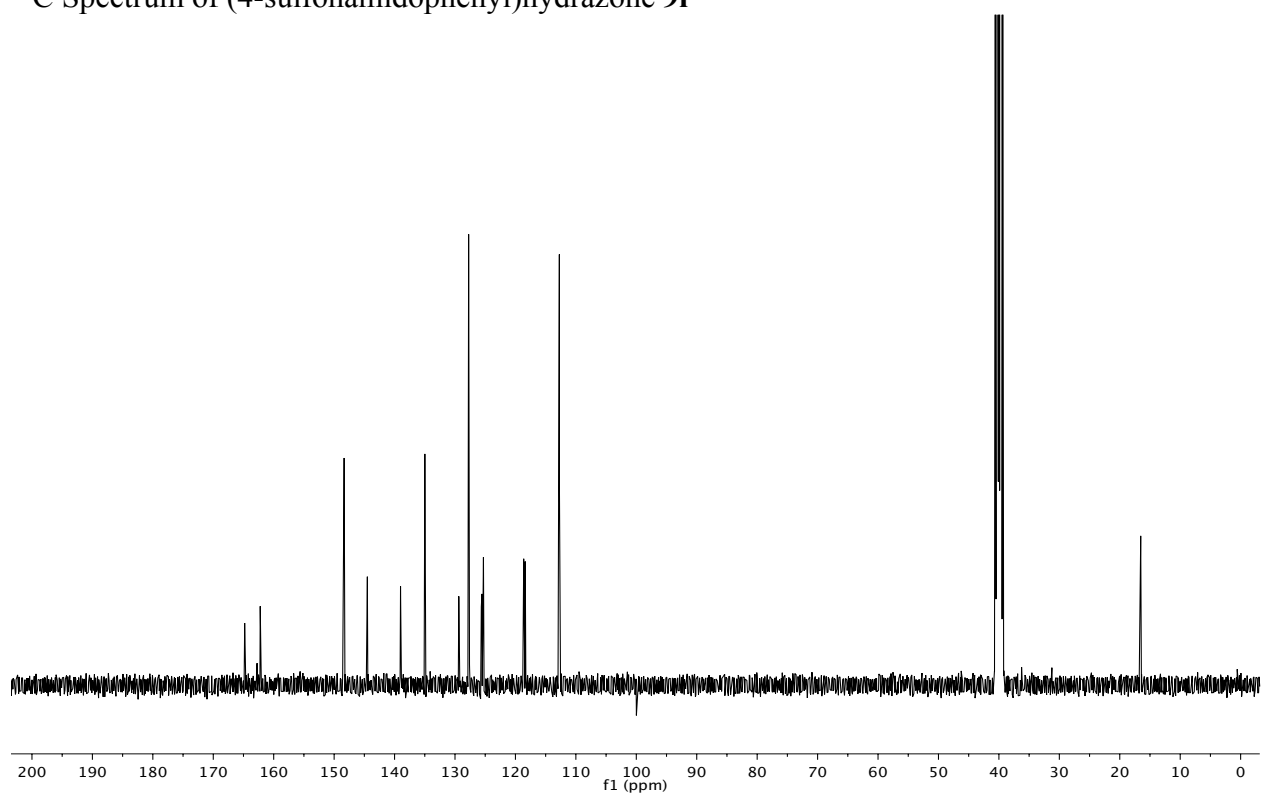



$^{13}\text{C}$  Spectrum of (4-carboxyphenyl)hydrazone **9m**

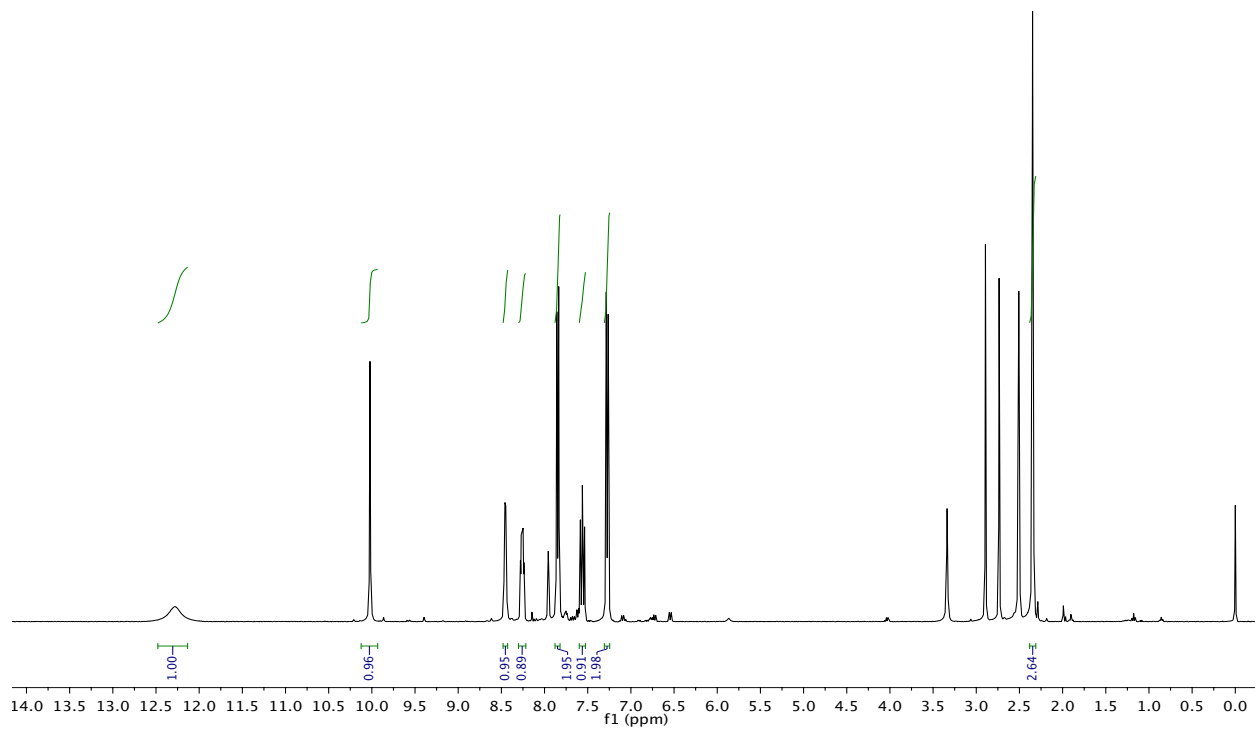

$^{13}\text{C}$  Spectrum of (4-carboxyphenyl)hydrazone **9m**

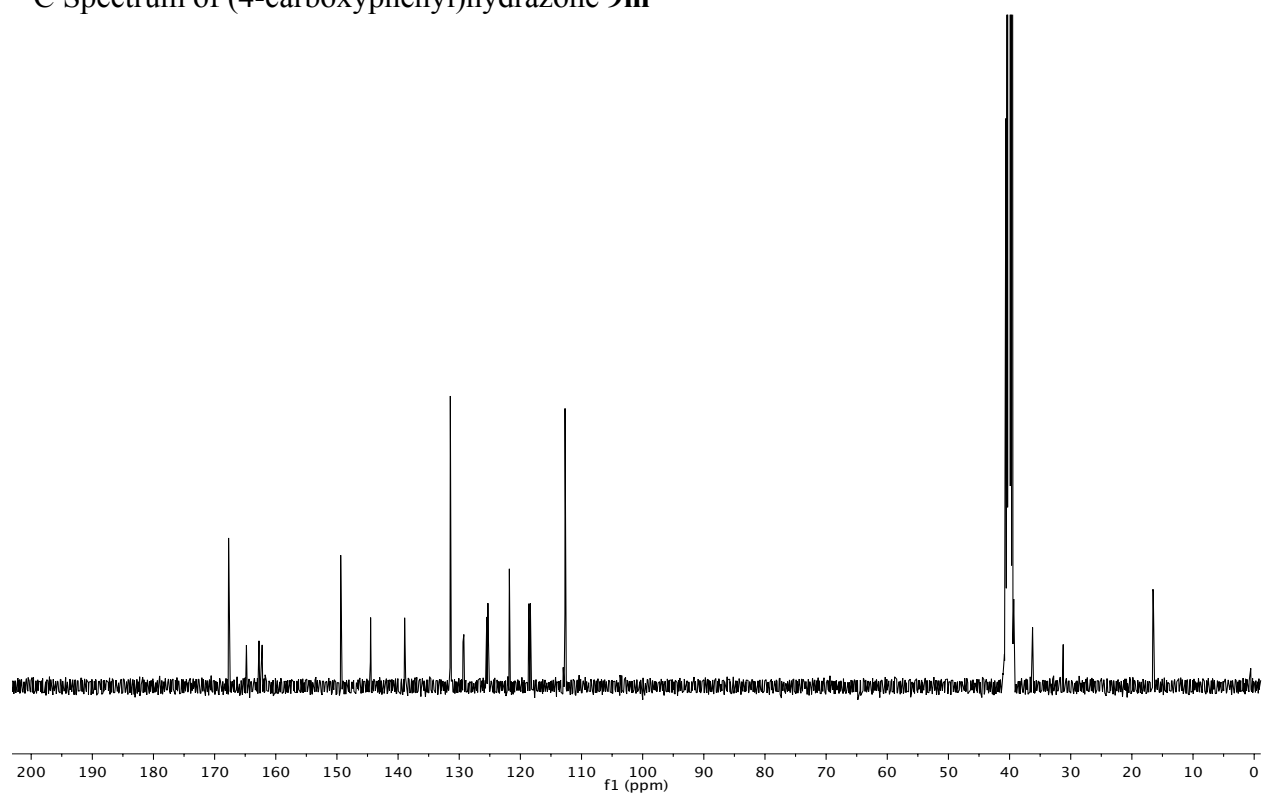

# <sup>1</sup>H Spectra of phenylhydrazone **10a**

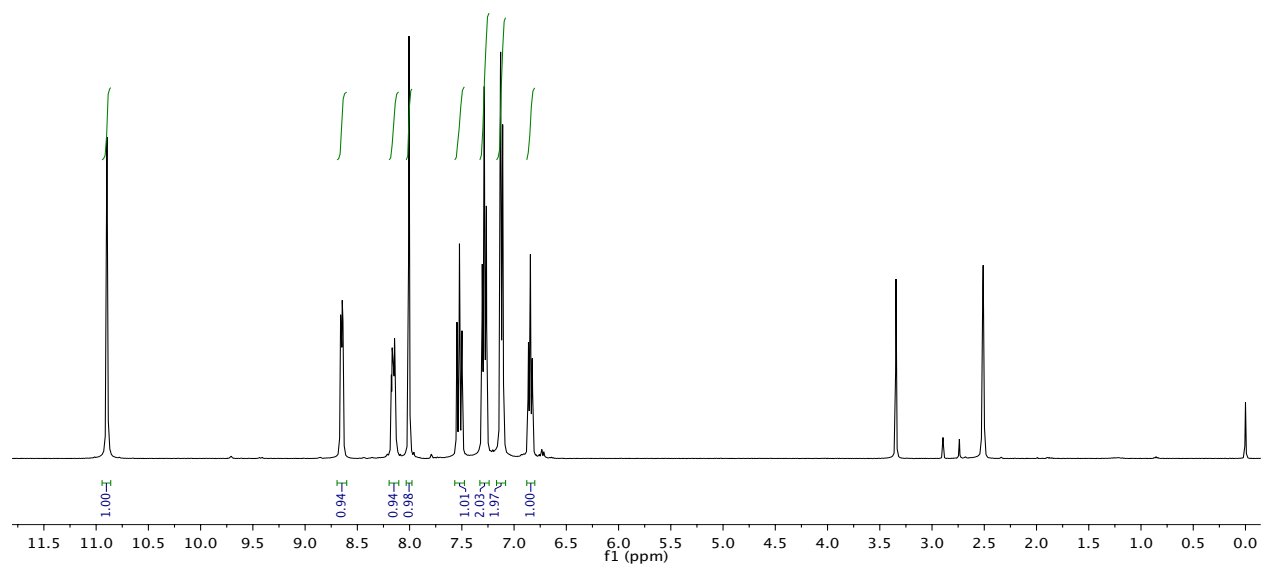

# <sup>13</sup>C Spectra of phenylhydrazone **10a**

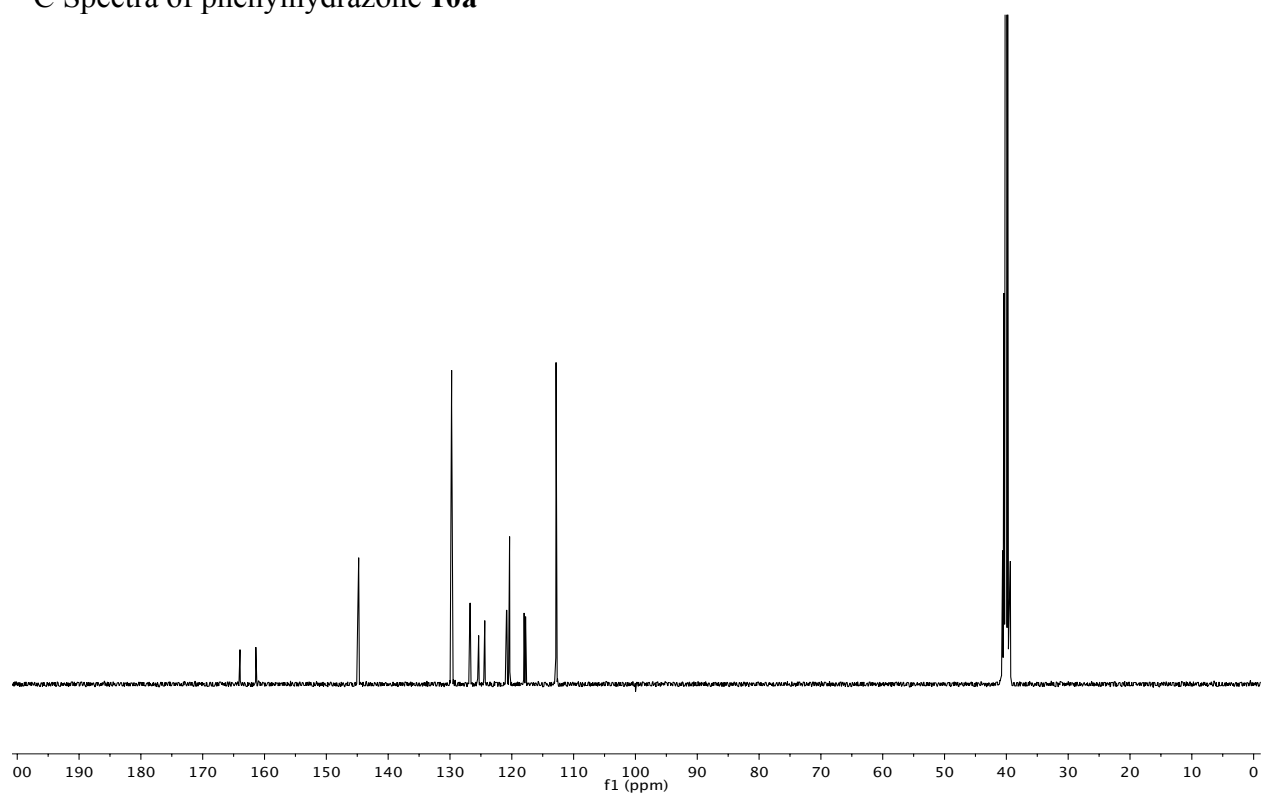

<sup>13</sup>C Spectrum of (2-methoxyphenyl)hydrazone **10b**

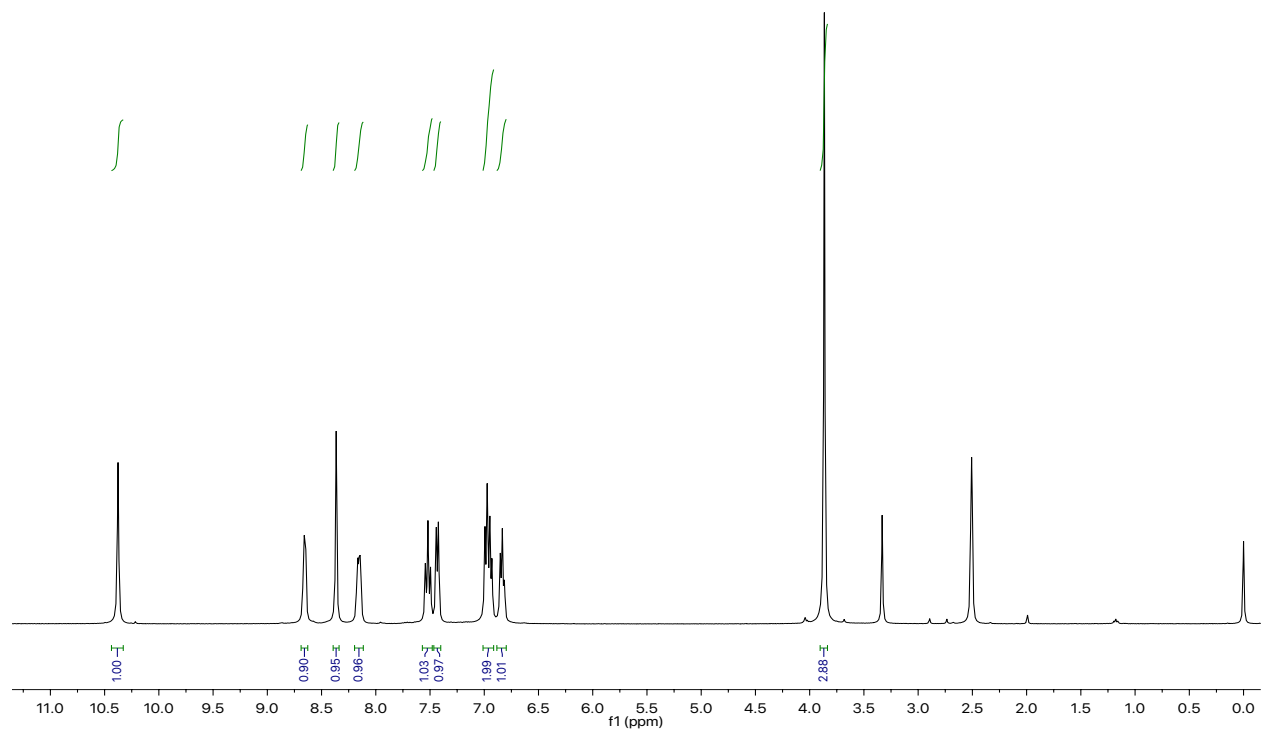

<sup>13</sup>C Spectrum of (2-methoxyphenyl)hydrazone **10b**

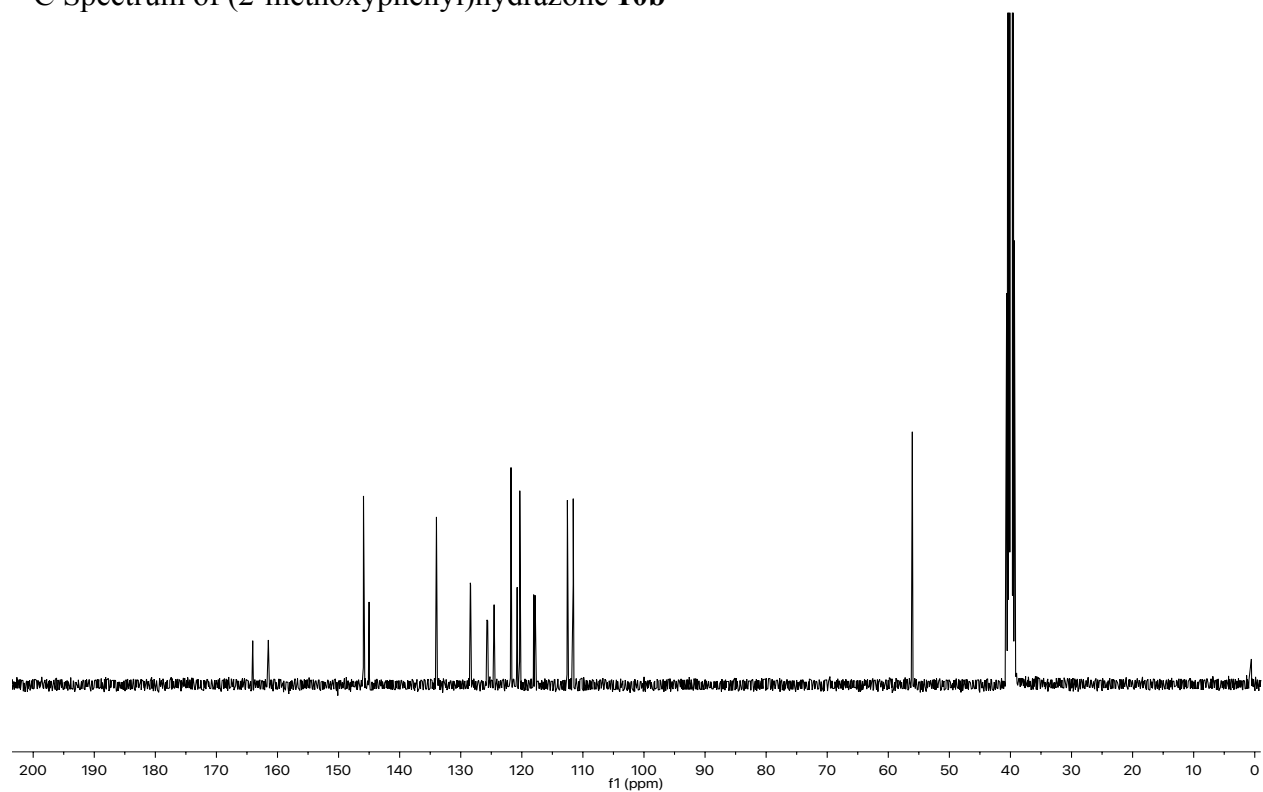

<sup>1</sup>H Spectrum of (3-methoxyphenyl)hydrazone **10c**

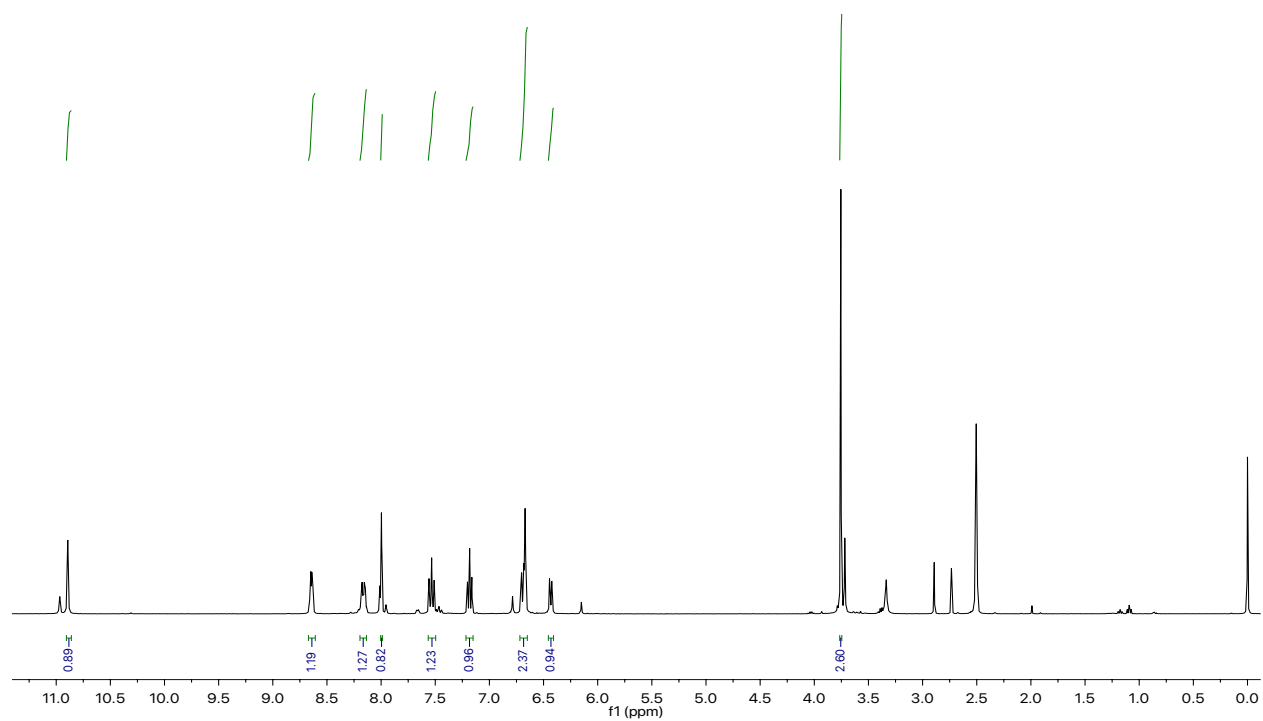

<sup>13</sup>C Spectrum of (3-methoxyphenyl)hydrazone **10c**

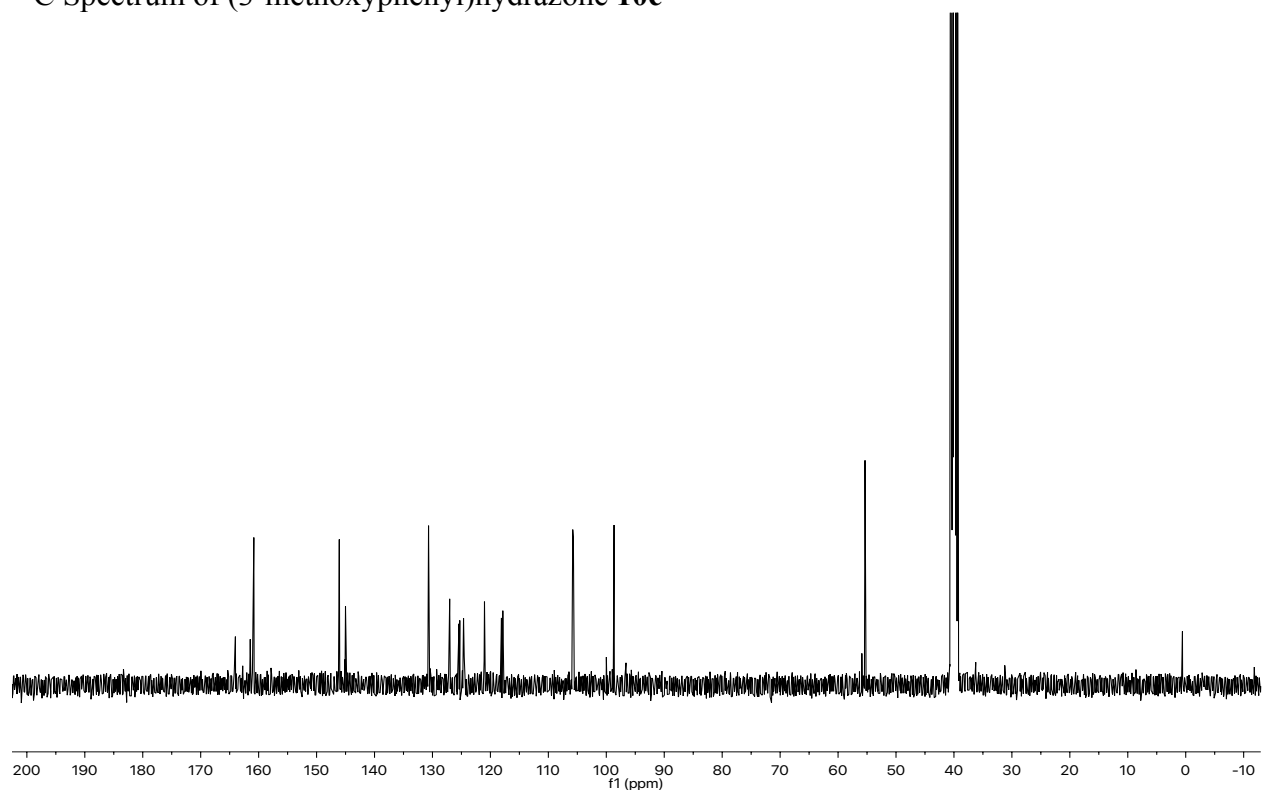

# <sup>1</sup>H Spectrum of (4-methoxyphenyl)hydrazone **10d**

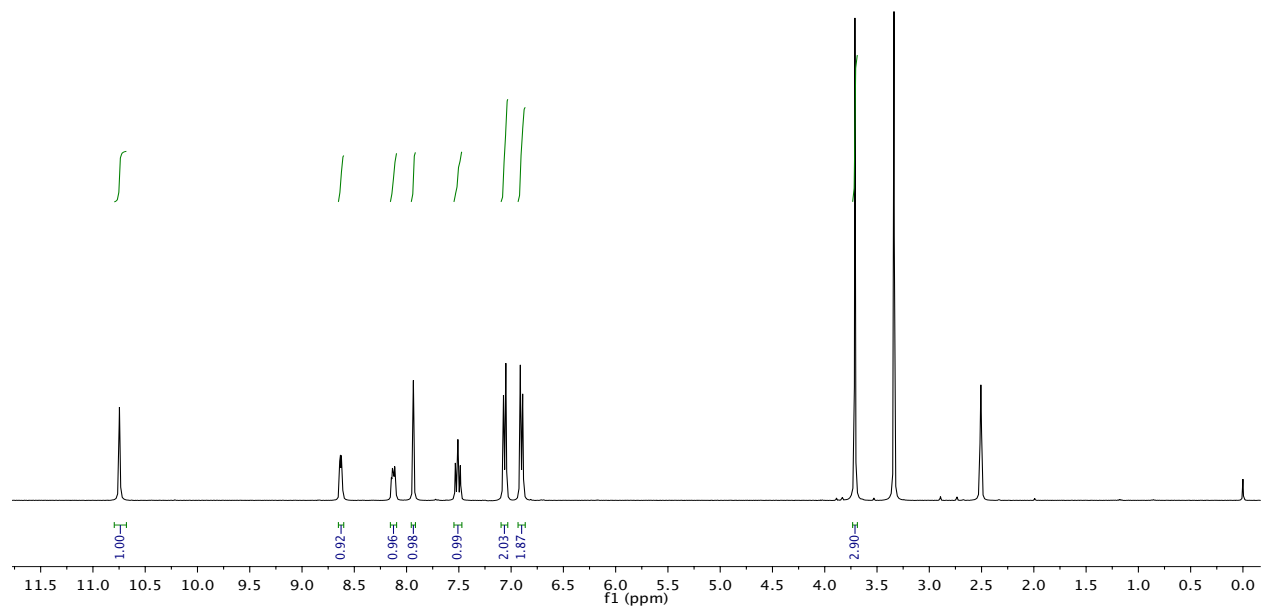

# <sup>13</sup>C Spectrum of (4-methoxyphenyl)hydrazone **10d**

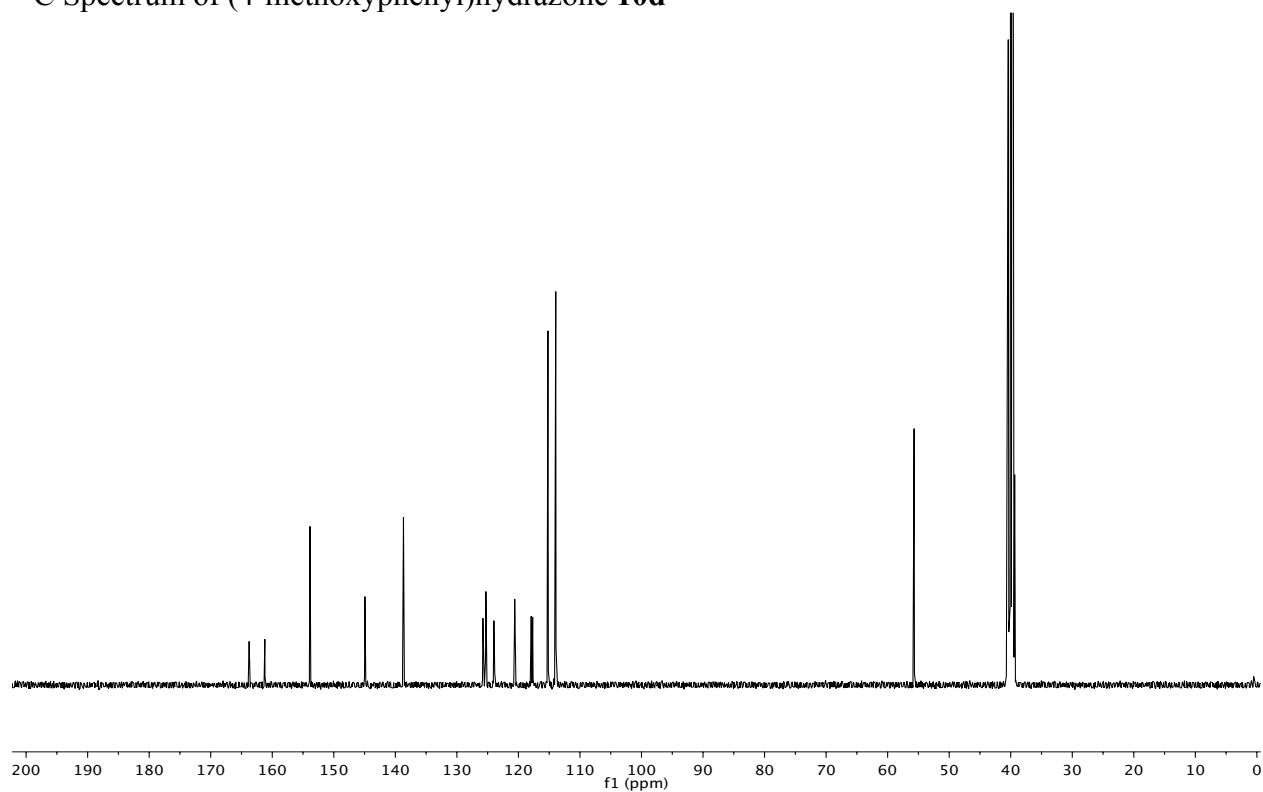

<sup>1</sup>H Spectrum of (4-bromophenyl)hydrazone **10e**

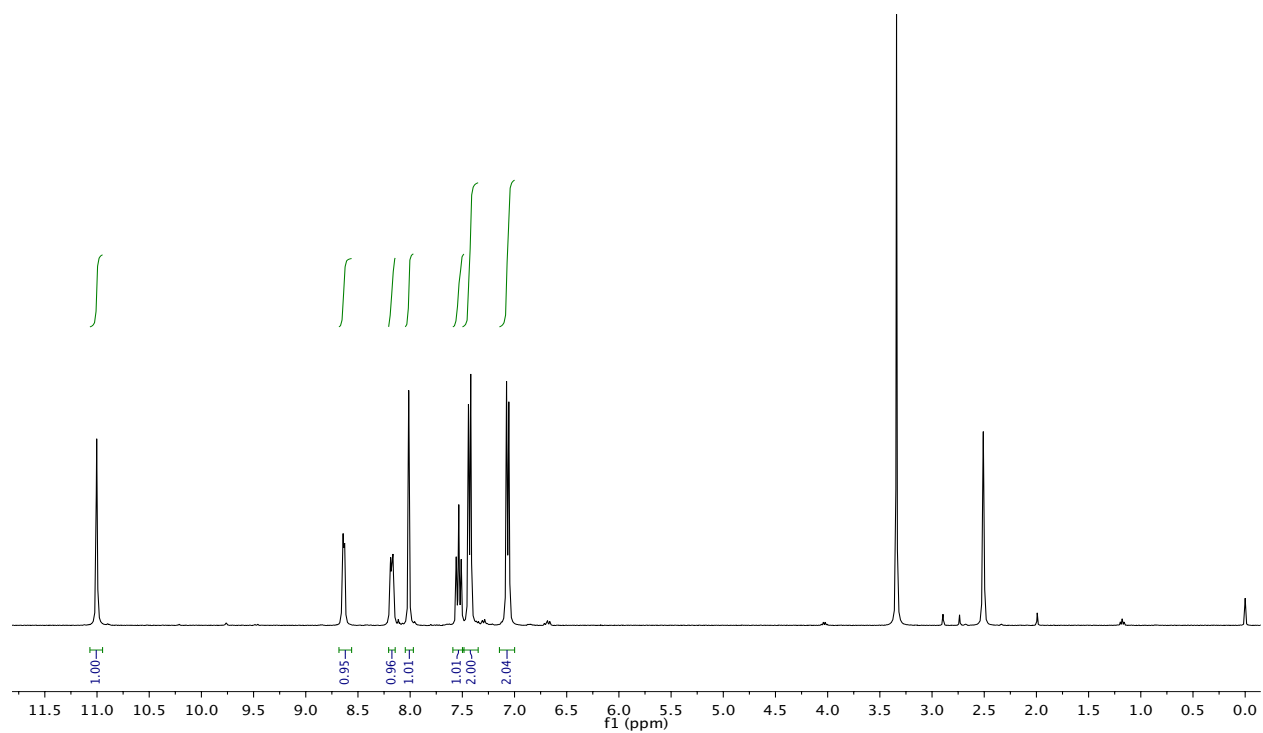

<sup>13</sup>C Spectrum of (4-bromophenyl)hydrazone **10e**

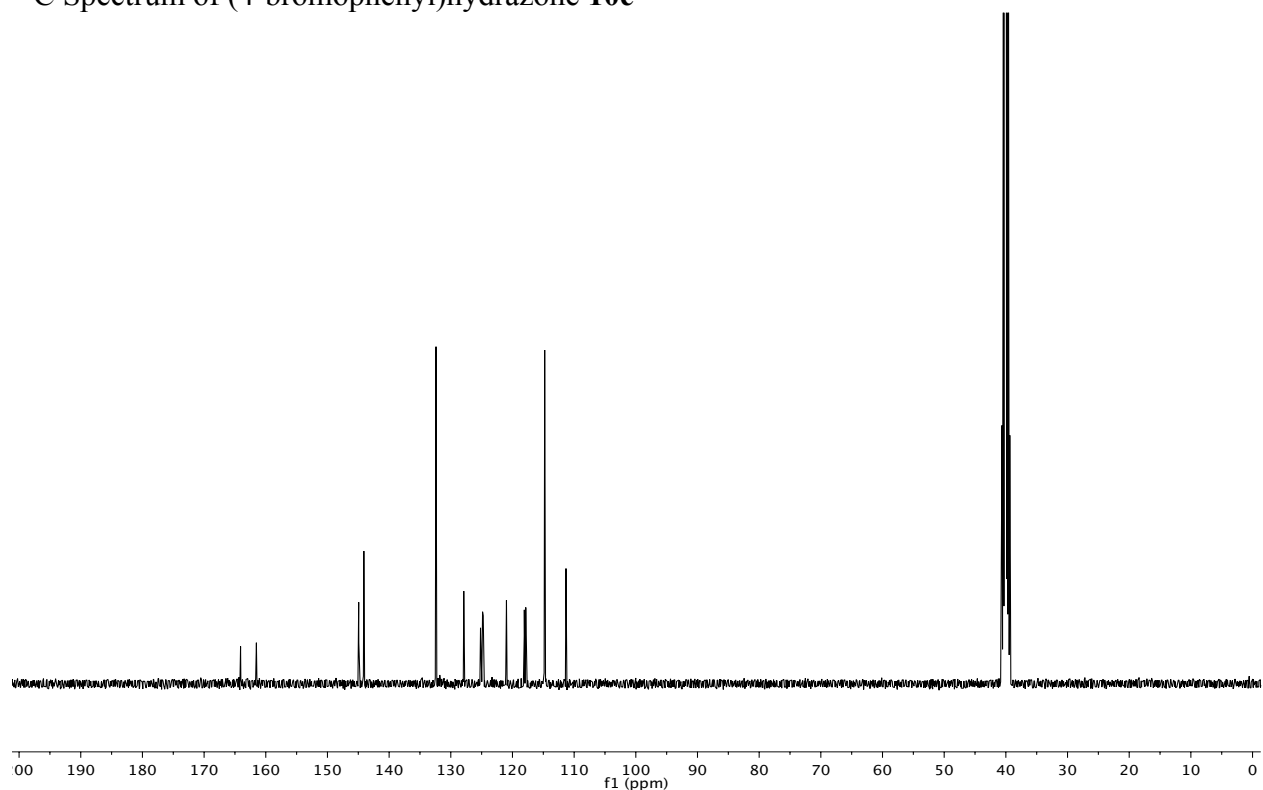

# <sup>1</sup>H Spectrum of (3-chlorophenyl)hydrazone **10f**

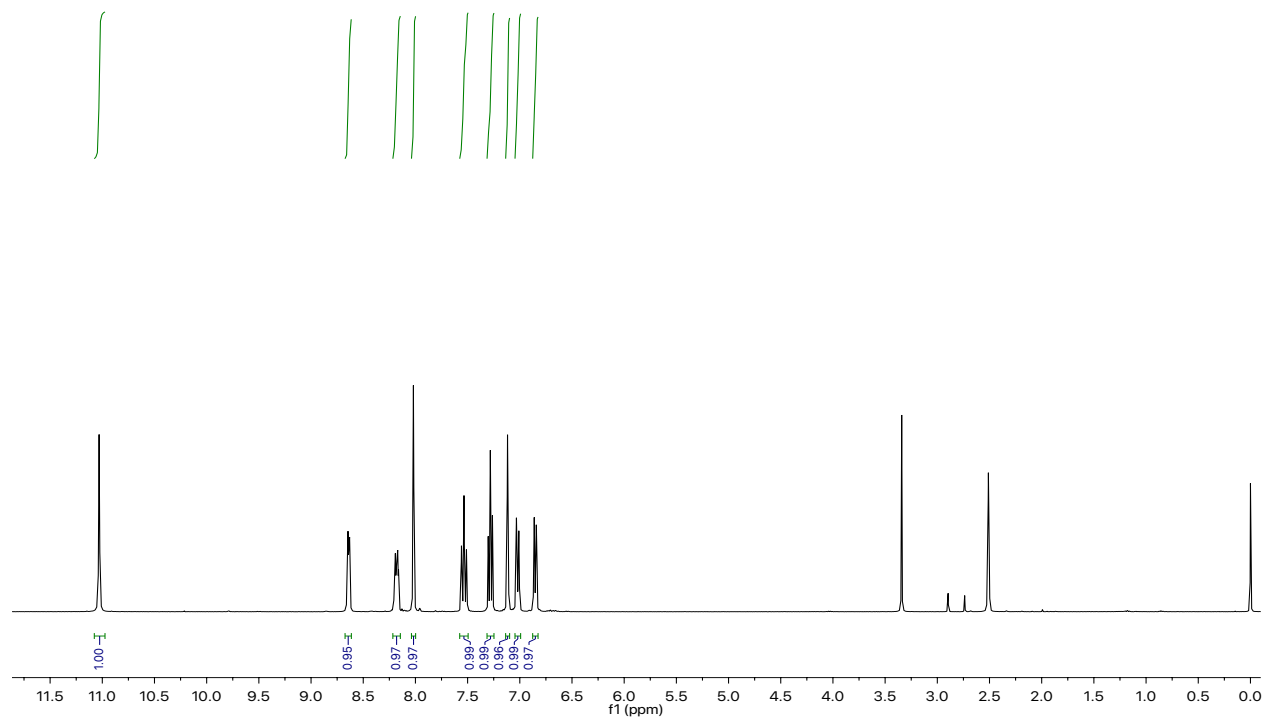

# <sup>13</sup>C Spectrum of (3-chlorophenyl)hydrazone **10f**

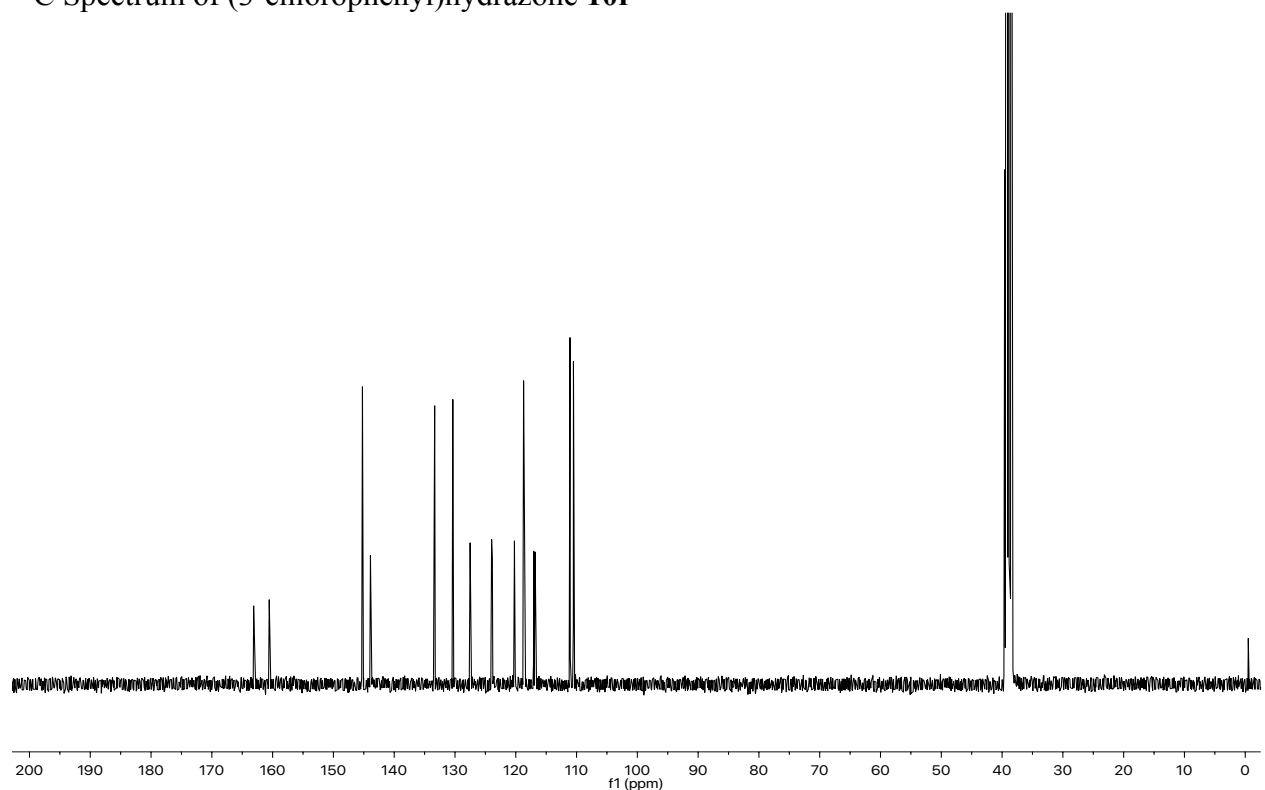

<sup>1</sup>H Spectrum of (4-chlorophenyl)hydrazone **10g**

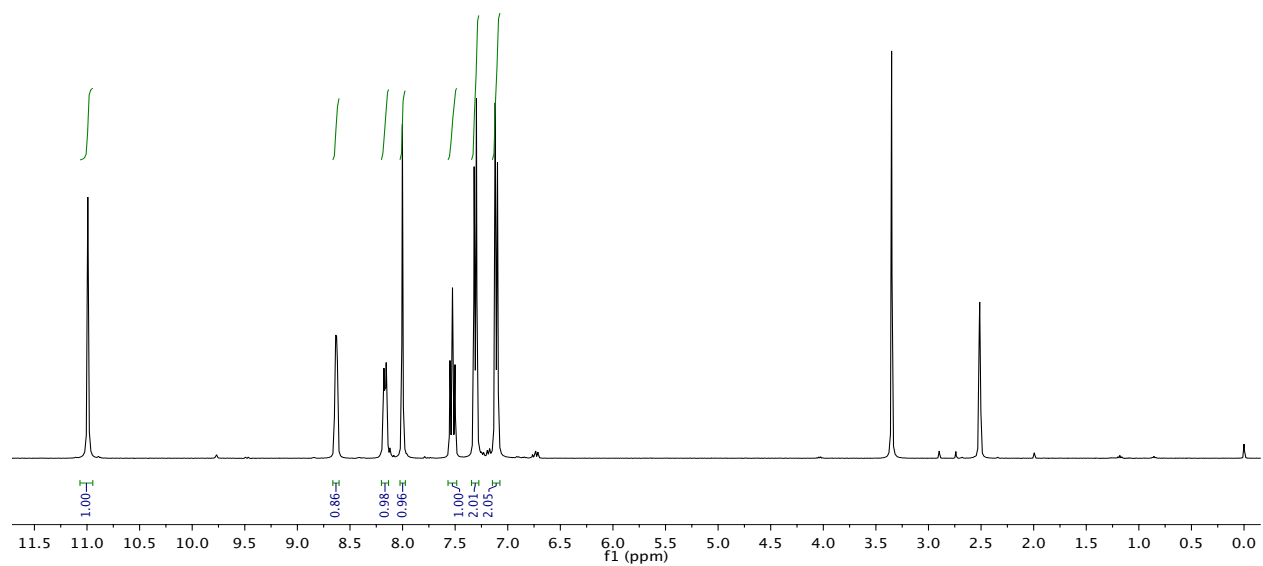

<sup>13</sup>C Spectrum of (4-chlorophenyl)hydrazone **10g**

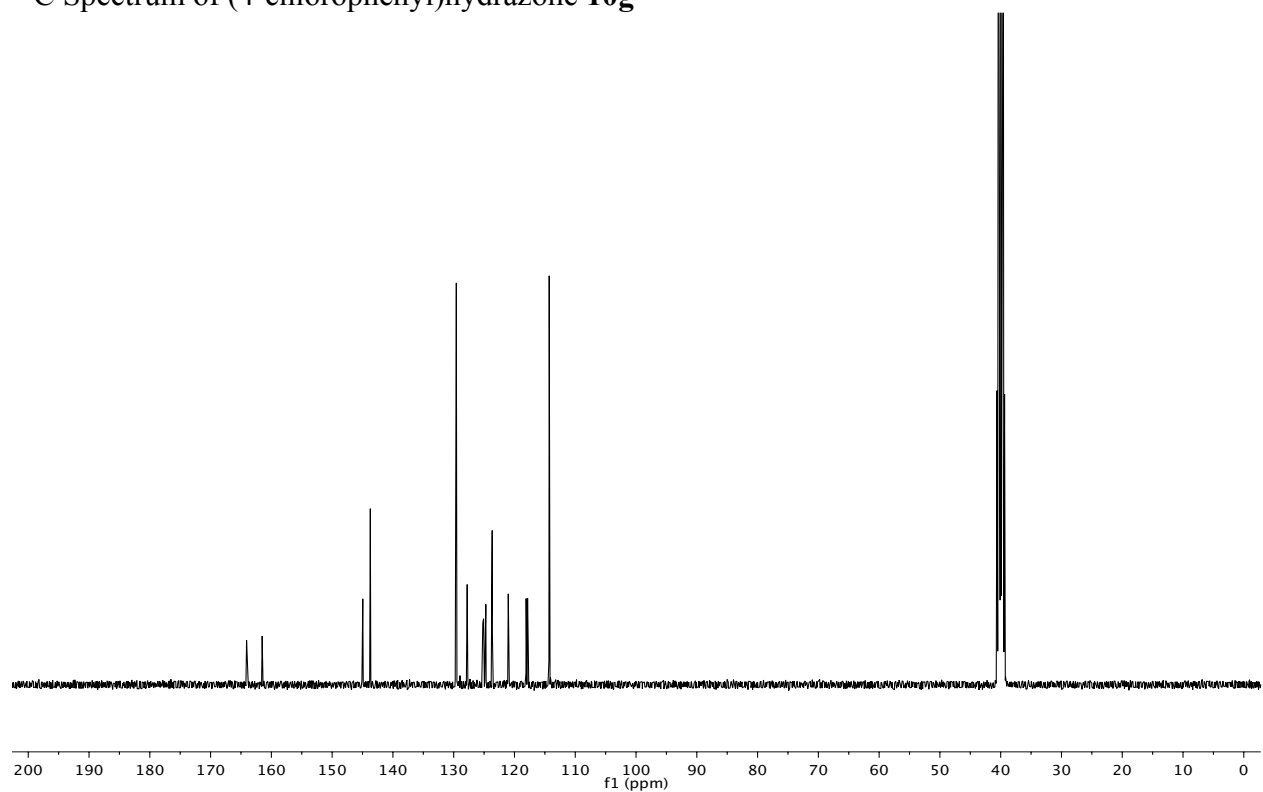



<sup>1</sup>H Spectrum of (2,4-dichlorophenyl)hydrazone **10h**

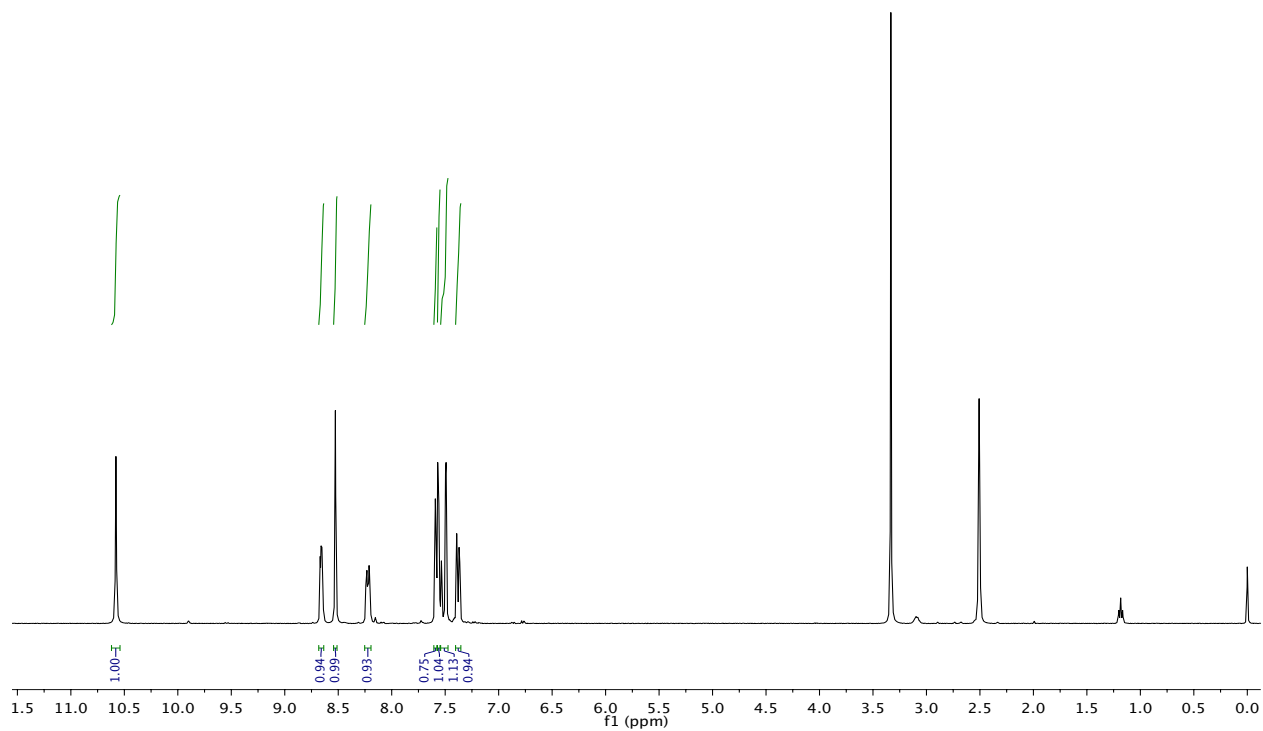

<sup>13</sup>C Spectrum of (2,4-dichlorophenyl)hydrazone **10h**

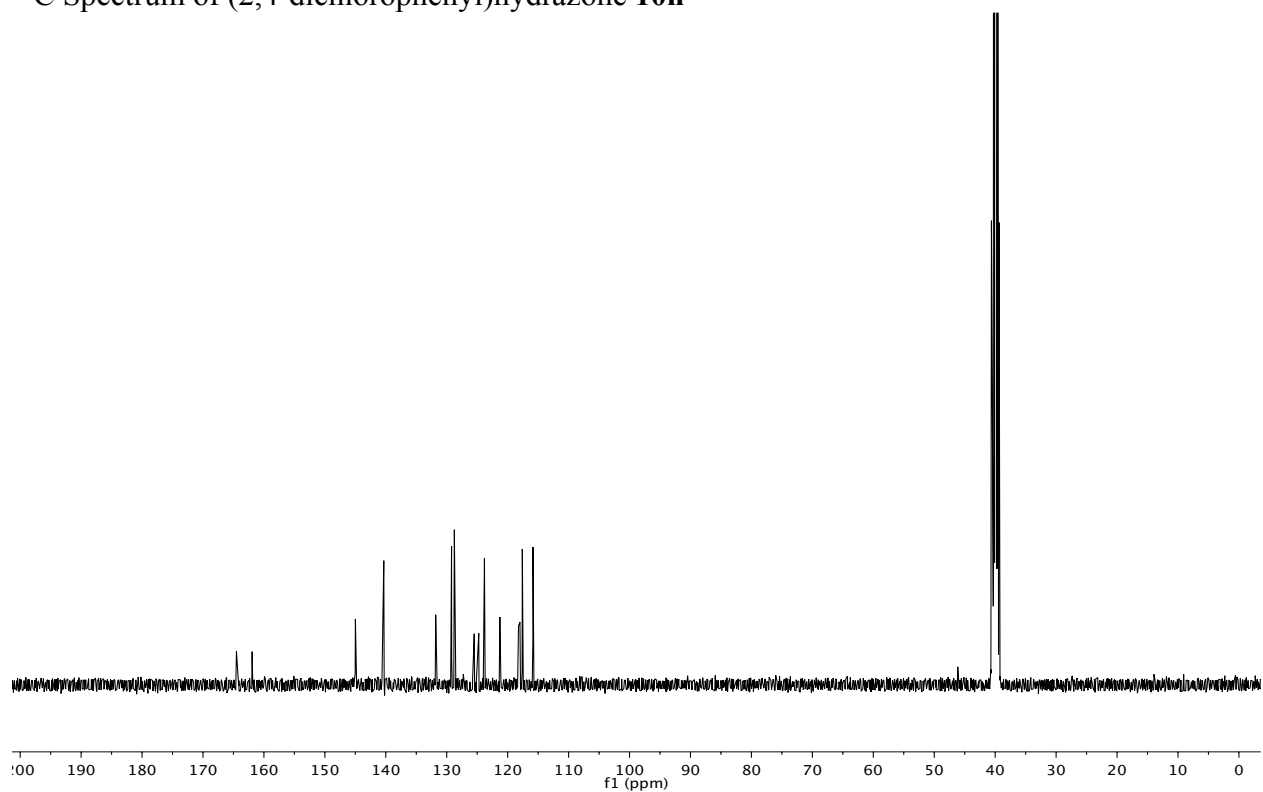

<sup>1</sup>H Spectrum of (4-(trifluoromethyl)phenyl)hydrazone **10i**

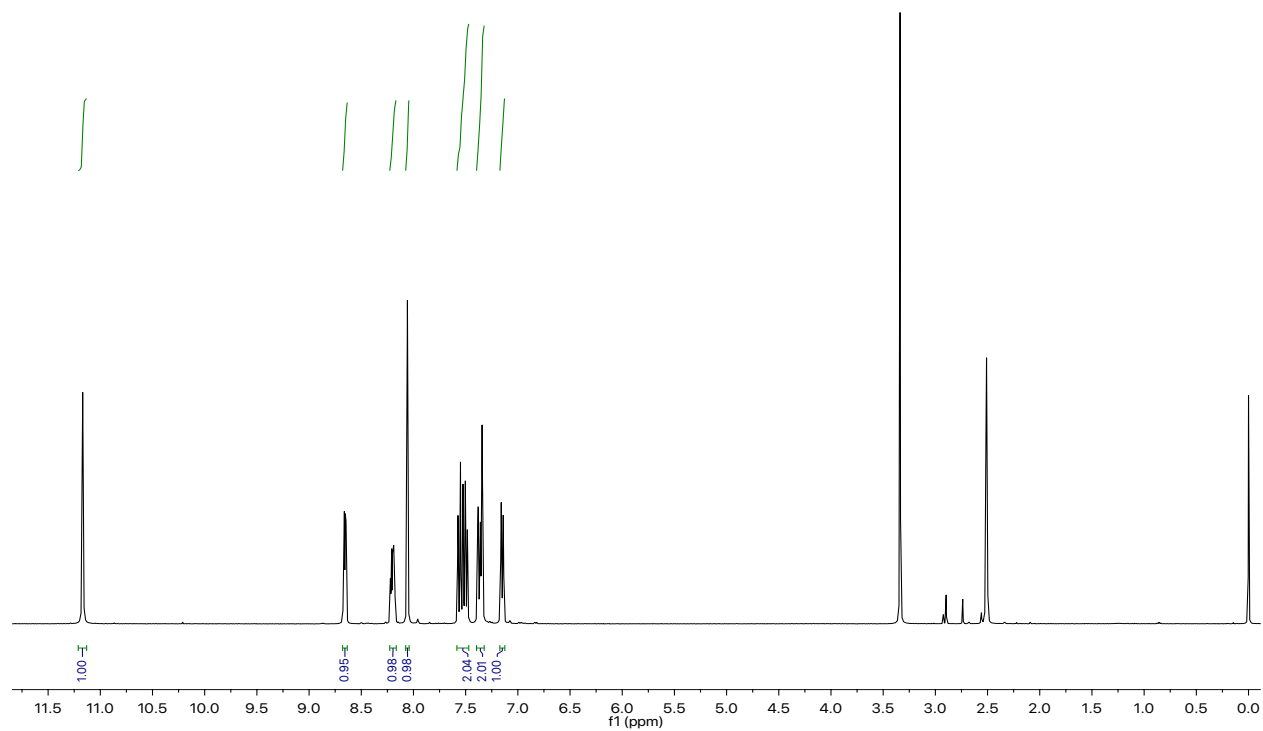

<sup>13</sup>C Spectrum of (3-(trifluoromethyl)phenyl)hydrazone **10i**

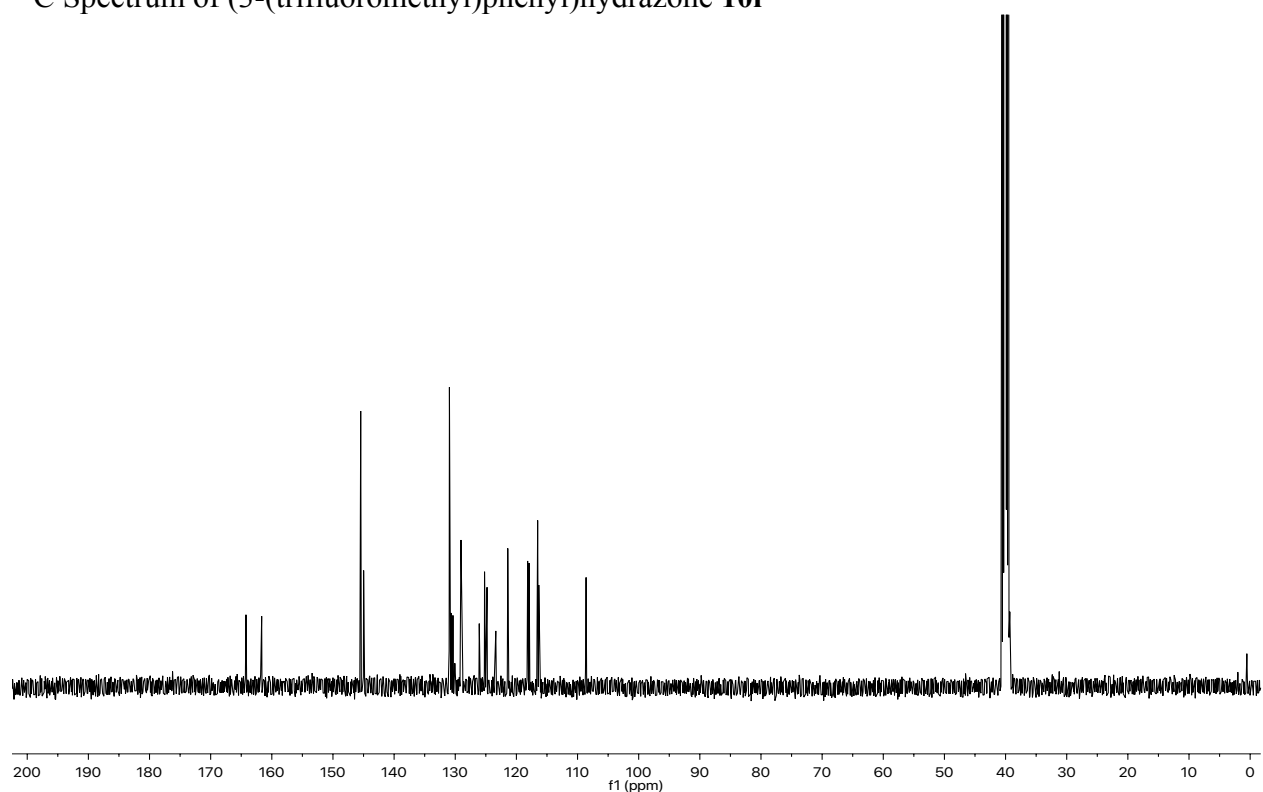

<sup>1</sup>H Spectrum of (4-(trifluoromethyl)phenyl)hydrazone **10j**

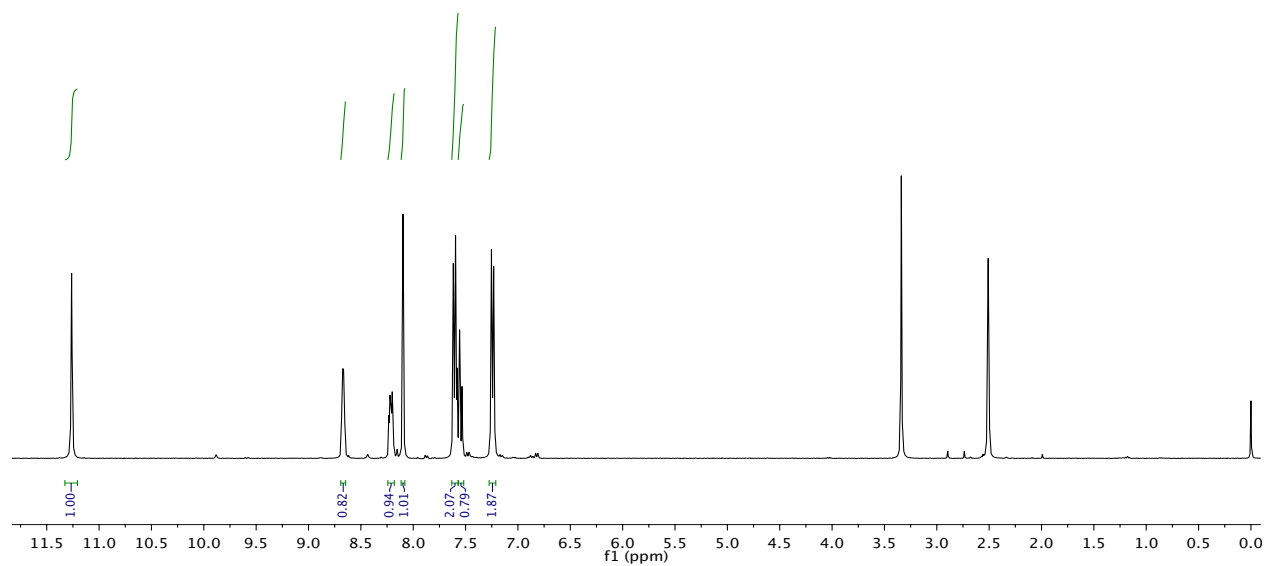

<sup>13</sup>C Spectrum of (4-(trifluoromethyl)phenyl)hydrazone **10j**

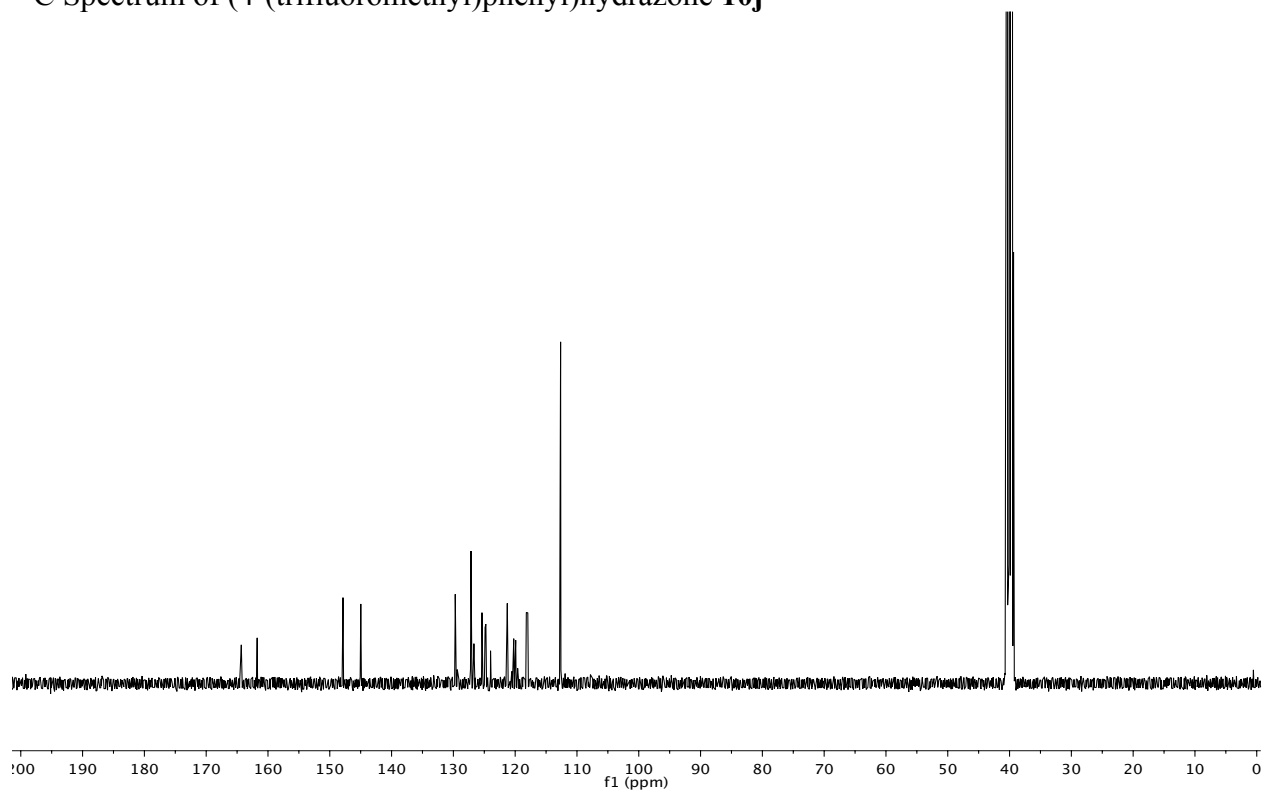

<sup>1</sup>H Spectrum of (4-cyanophenyl)hydrazine **10k**

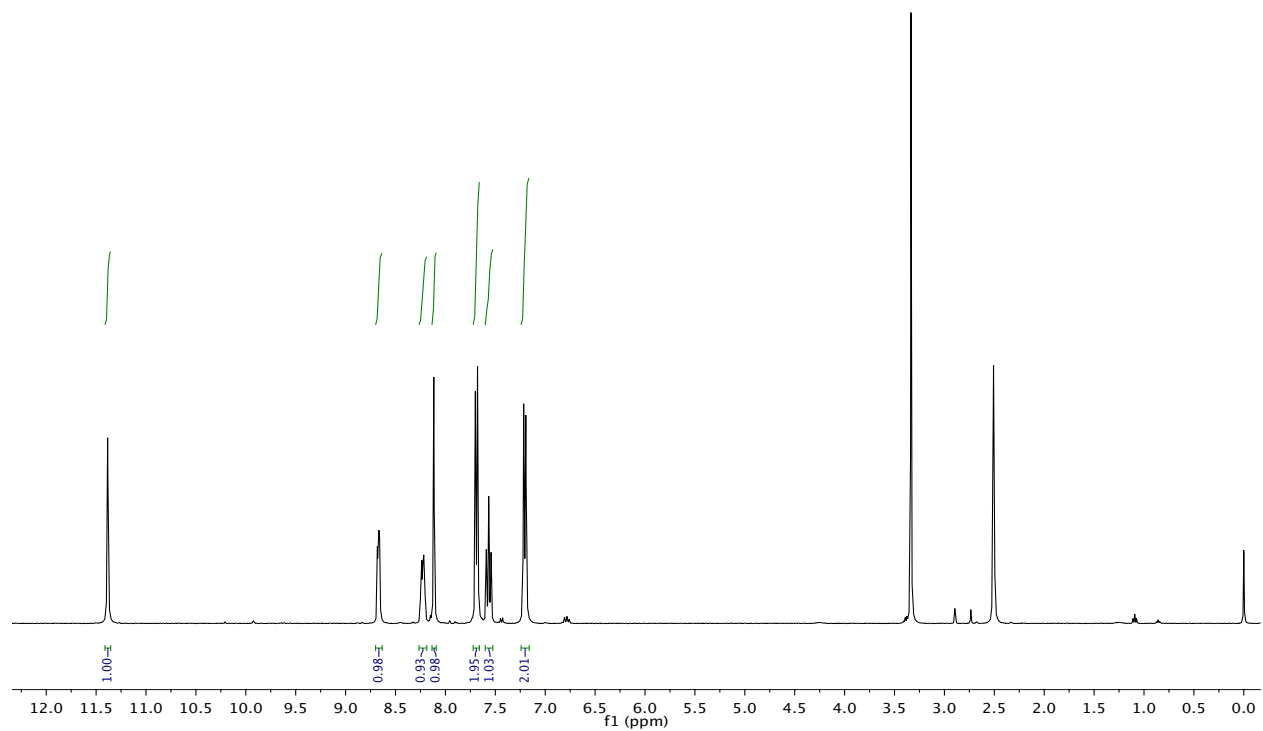

<sup>13</sup>C Spectrum of (4-cyanophenyl)hydrazine **10k**

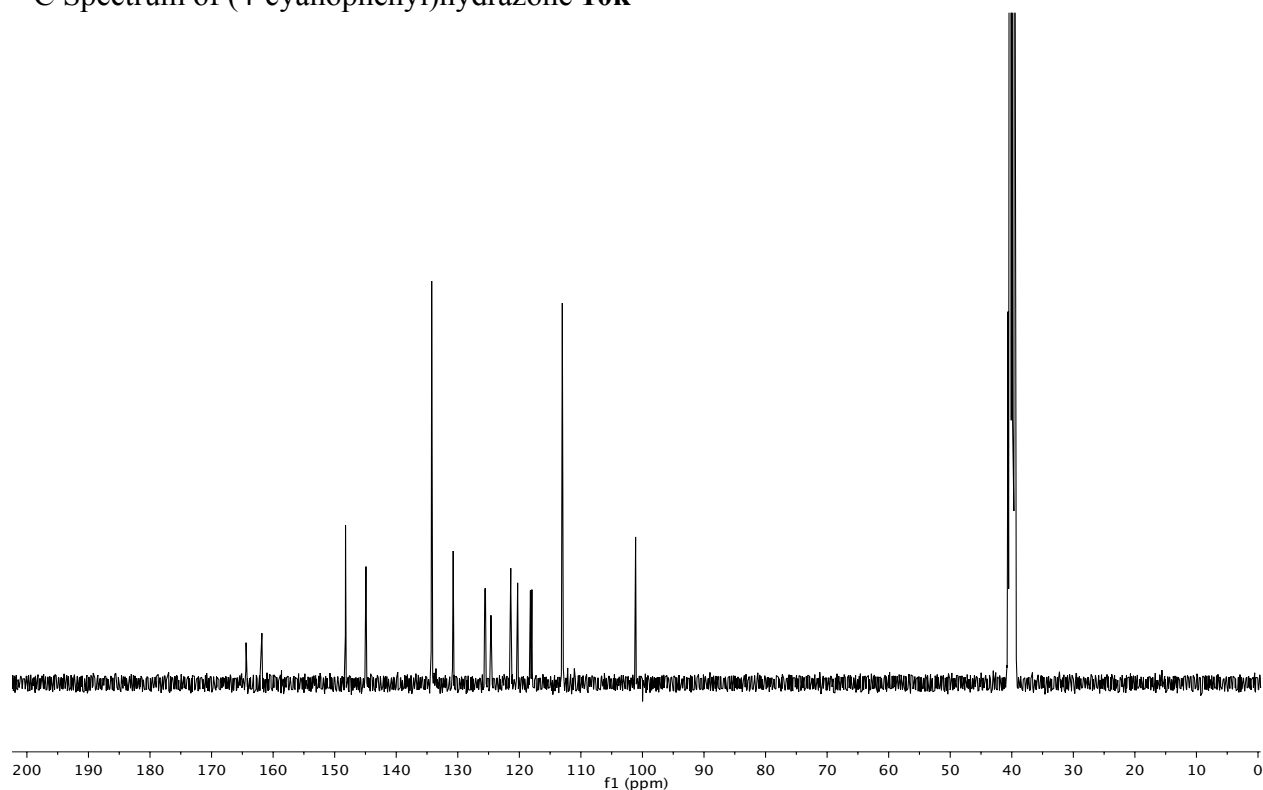

<sup>1</sup>H Spectrum of (4-sulfonamidophenyl)hydrazone **101**

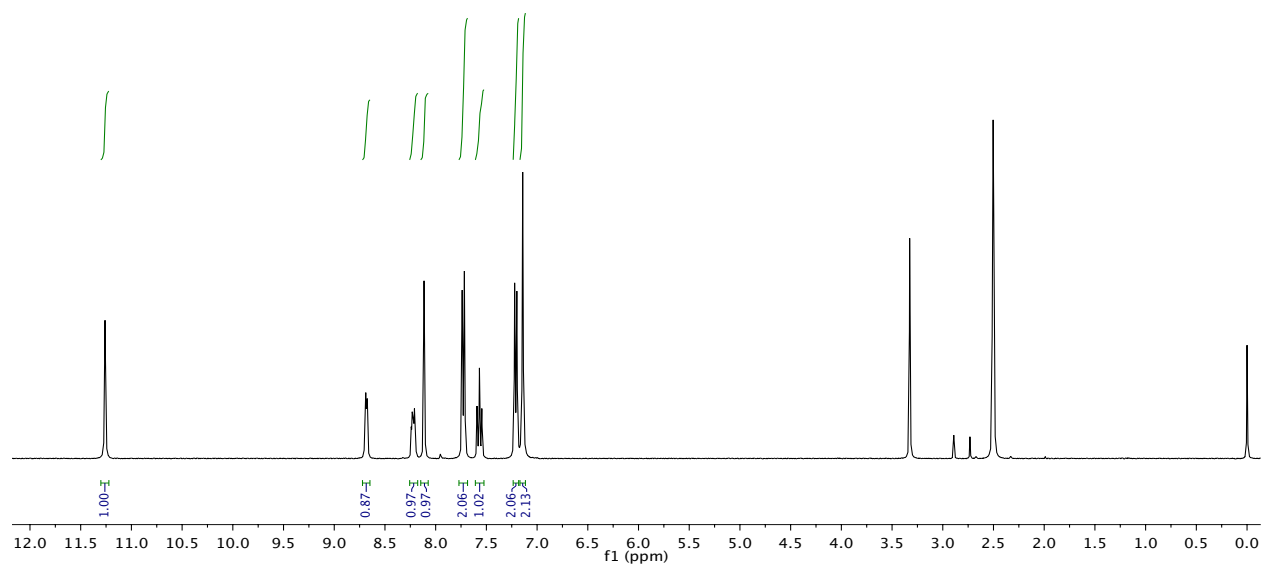

<sup>13</sup>C Spectrum of (4-sulfonamidophenyl)hydrazone **101**

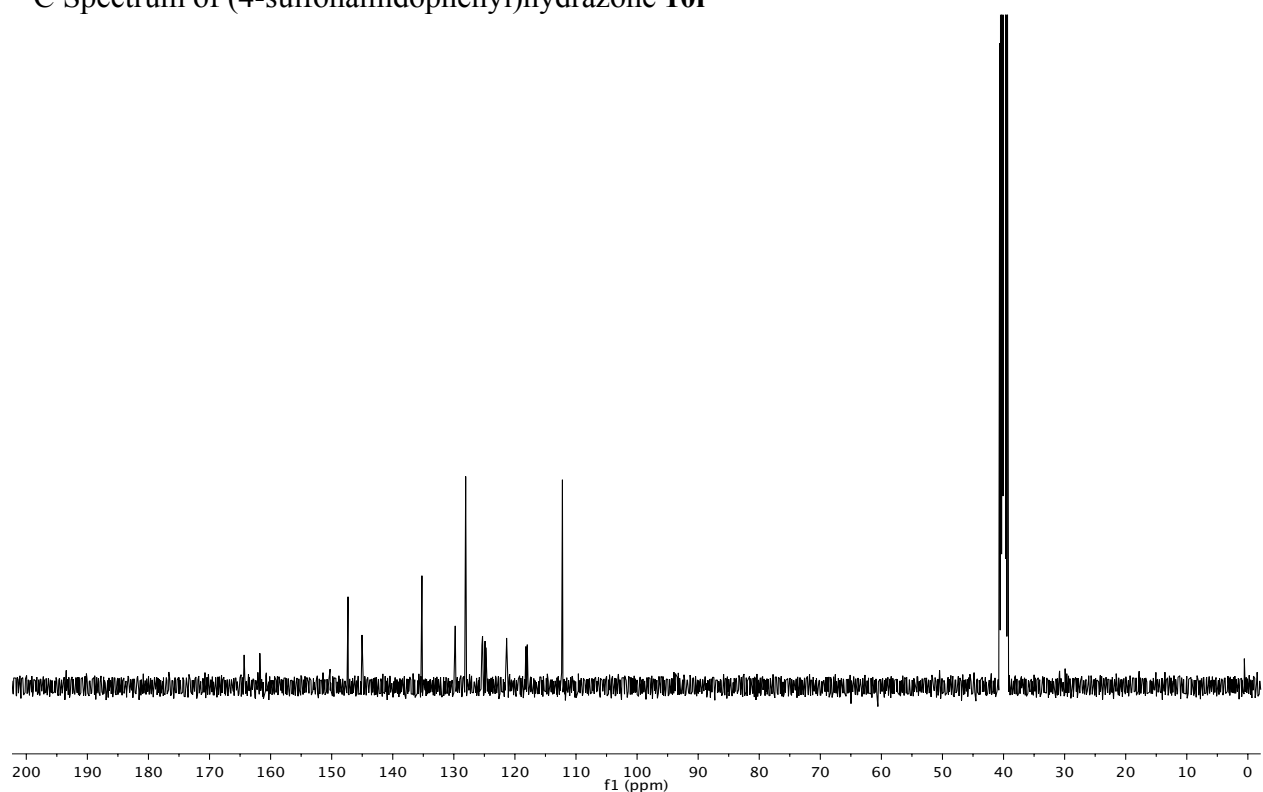

<sup>1</sup>H Spectrum of (4-carboxyphenyl)hydrazone **10m**

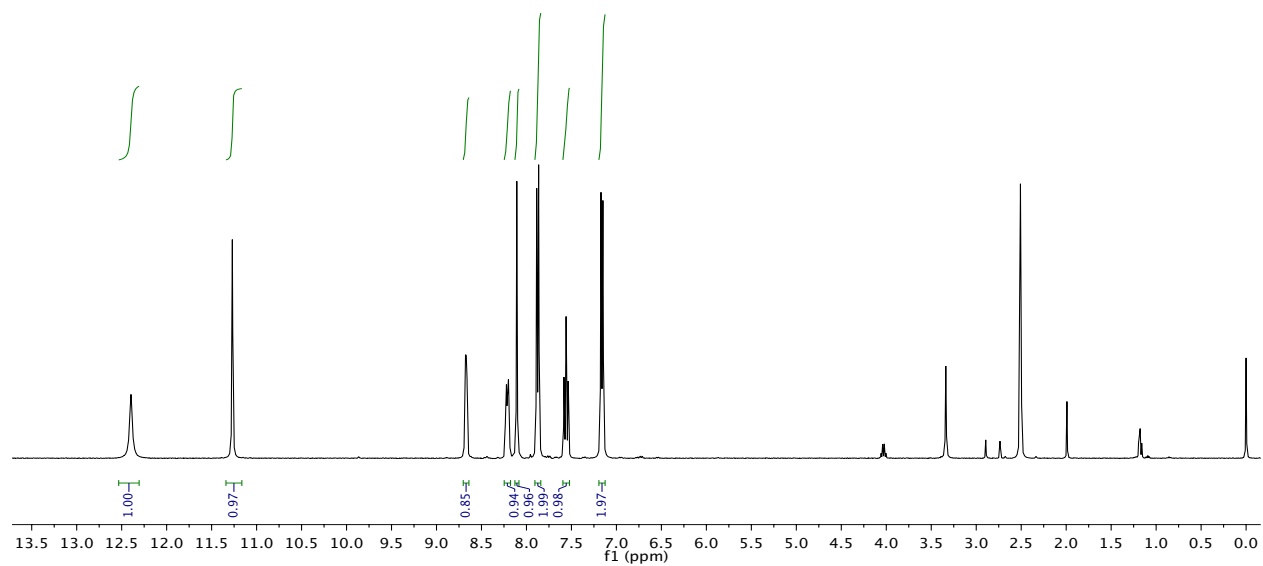

<sup>13</sup>C Spectrum of (4-carboxyphenyl)hydrazone **10m**

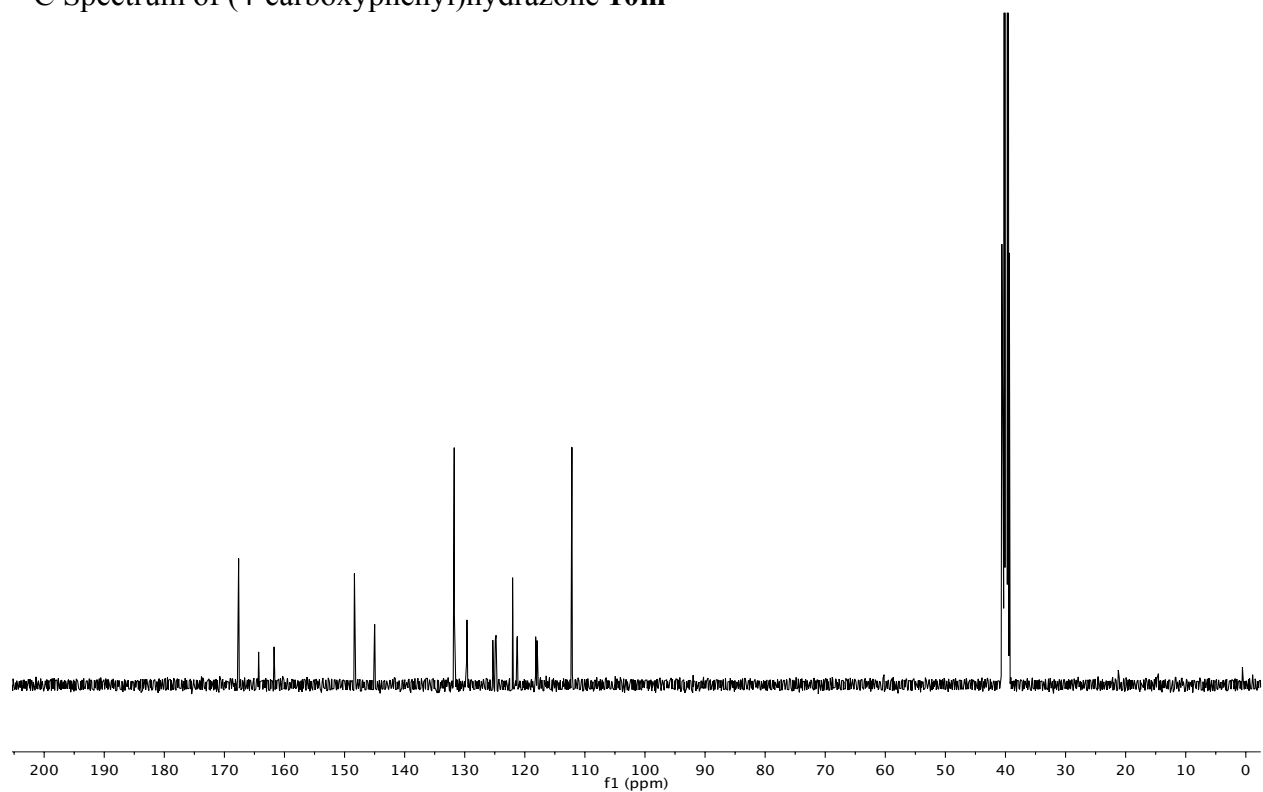

### <sup>1</sup>H Spectrum of 3-methyl-5-nitro-1*H*-indazole (7)

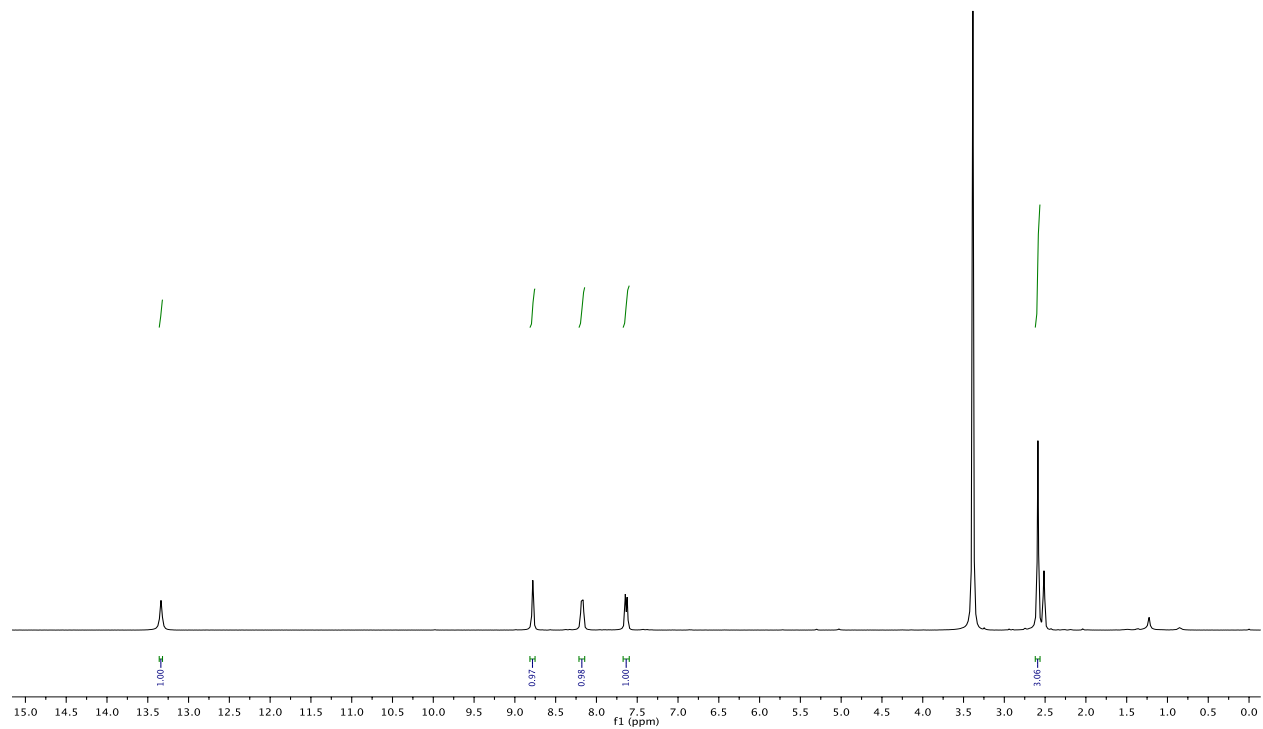

### <sup>13</sup>C Spectrum of 3-methyl-5-nitro-1*H*-indazole (7)

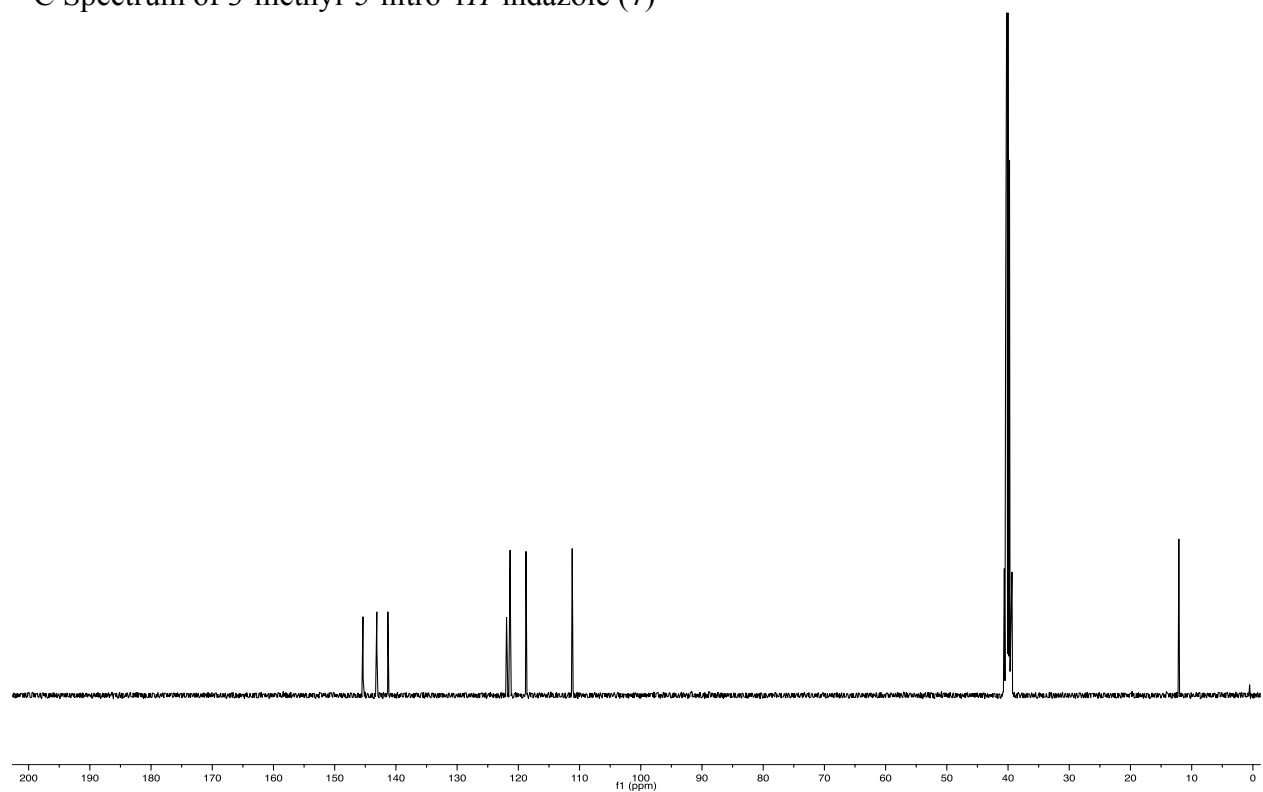

# $^1\text{H}$ Spectrum of 5-nitro-1*H*-indazole (**8**)

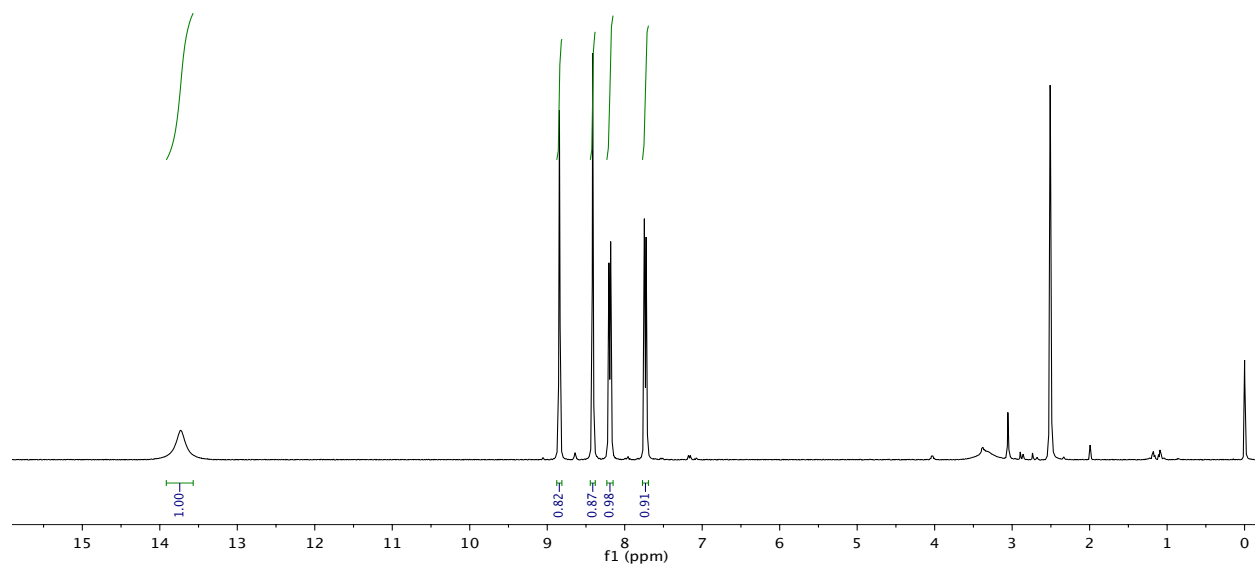

# $^{13}\text{C}$ Spectrum of 5-nitro-1*H*-indazole (**8**)

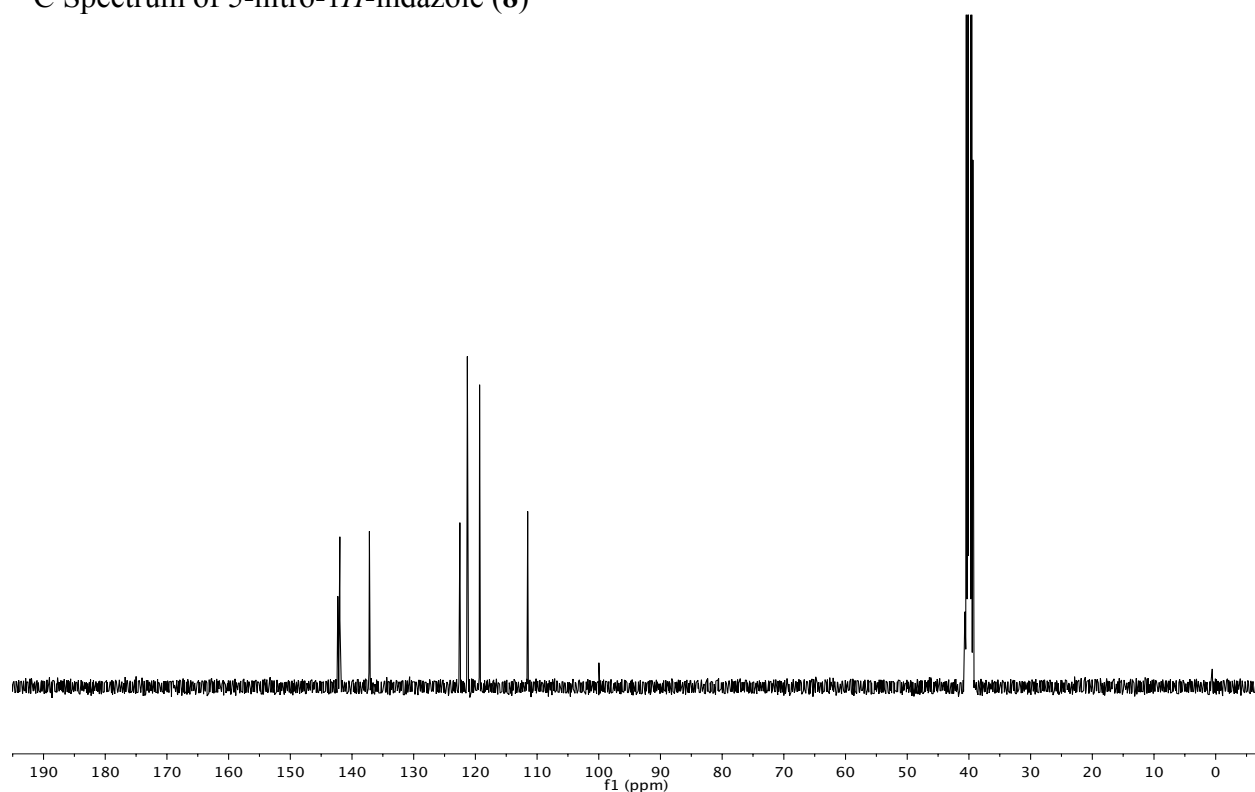



<sup>1</sup>H Spectrum of 3-methyl-1-phenyl-5-nitro-1*H*-indazole (**11a**)

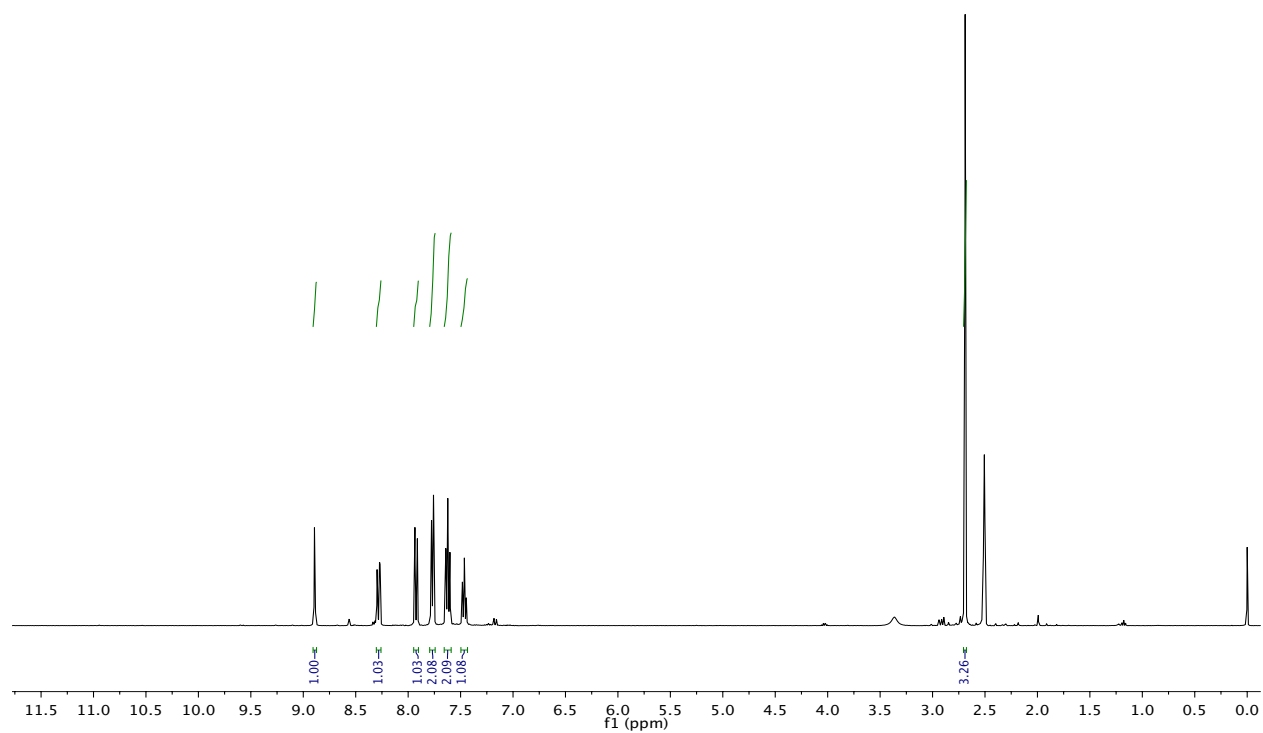

<sup>13</sup>C Spectrum of 3-methyl-1-phenyl-5-nitro-1*H*-indazole (**11a**)

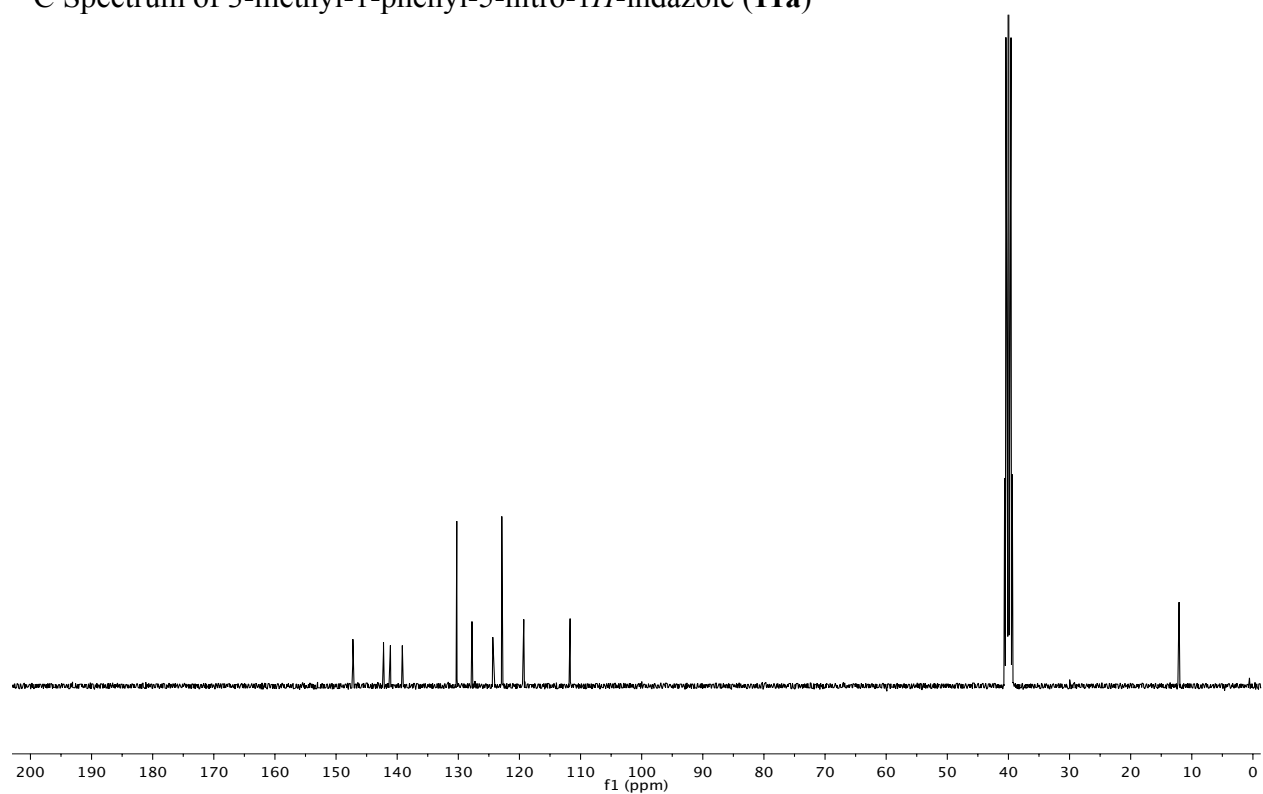

<sup>1</sup>H Spectrum of 1-(2-methoxyphenyl)-3-methyl-5-nitro-1*H*-indazole (**11b**)

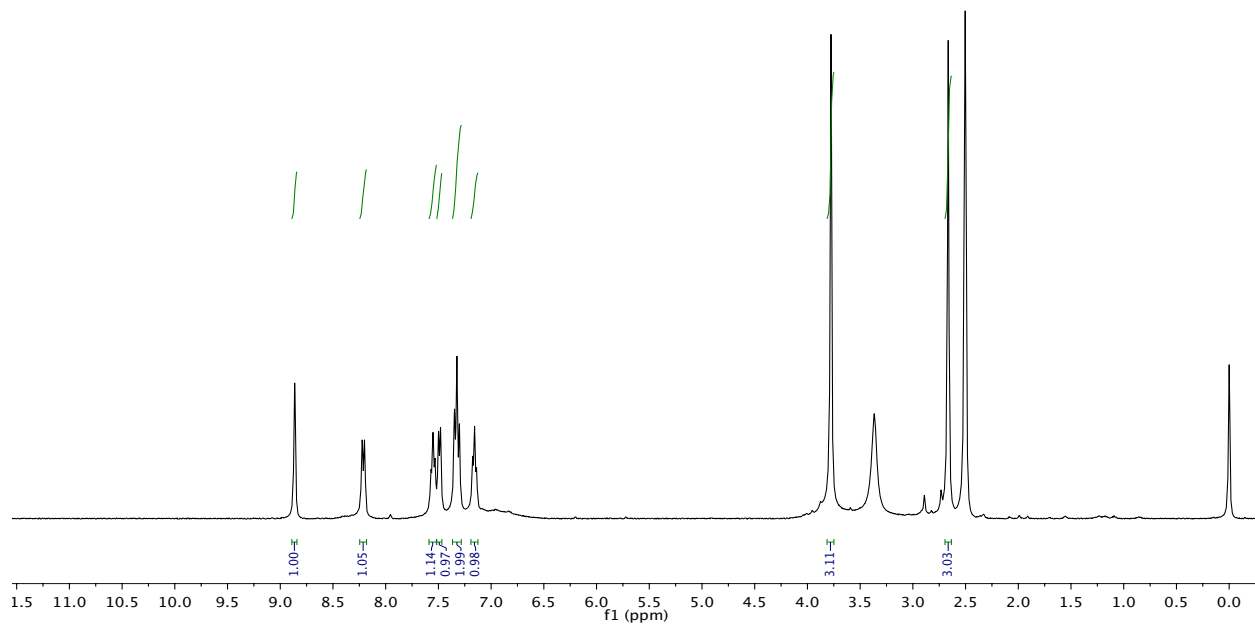

<sup>13</sup>C Spectrum of 1-(2-methoxyphenyl)-3-methyl-5-nitro-1*H*-indazole (**11b**)

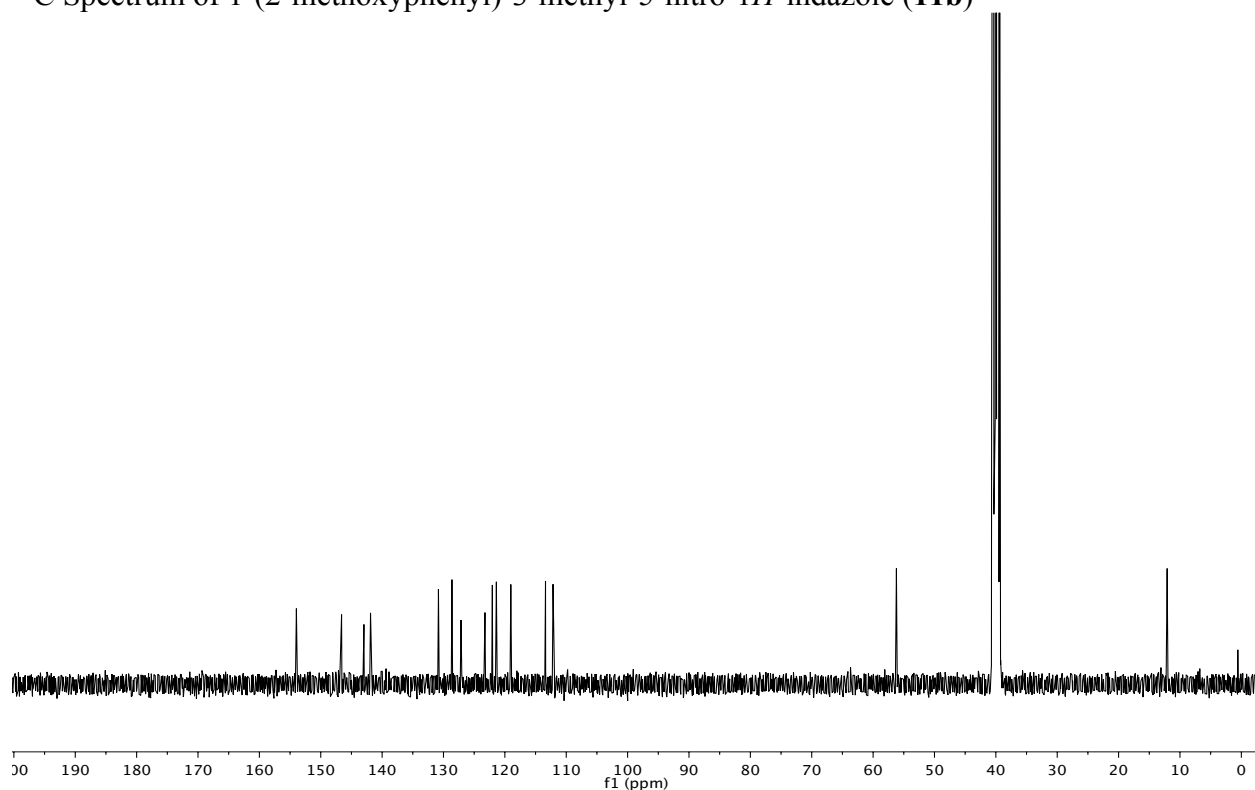

<sup>1</sup>H Spectrum of 1-(3-methoxyphenyl)-3-methyl-5-nitro-1*H*-indazole (**11c**)

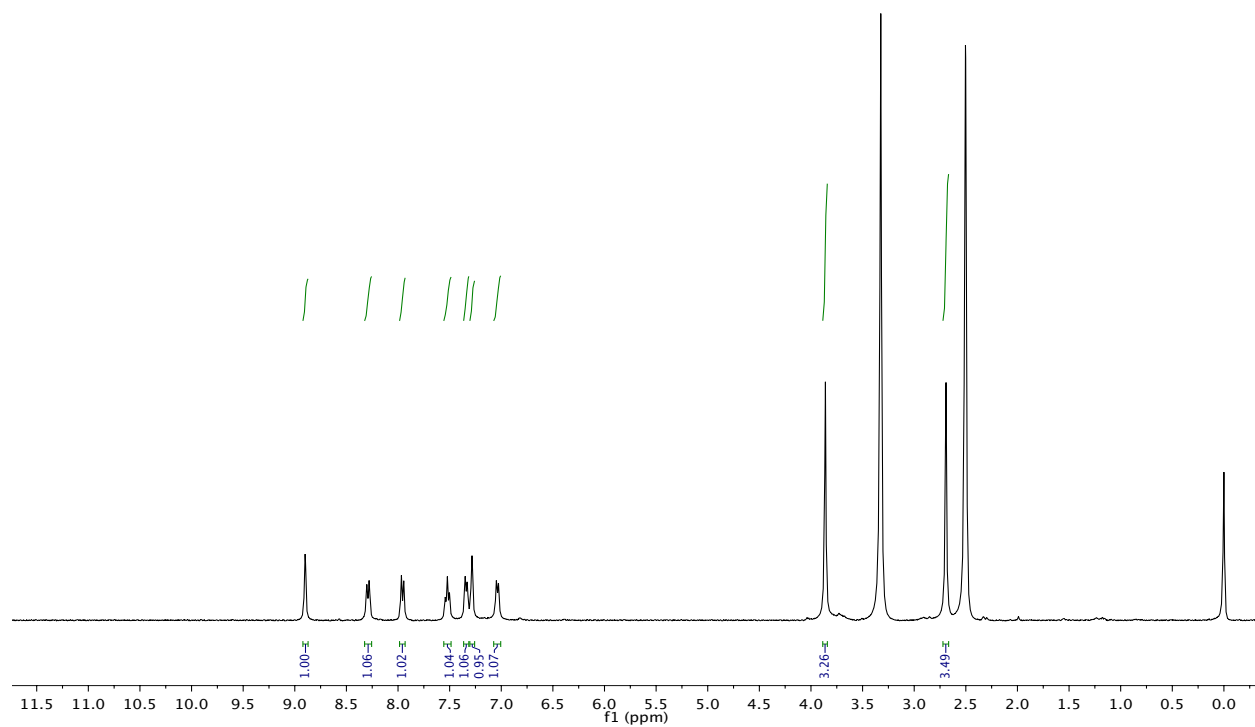

<sup>13</sup>C Spectrum of 1-(3-methoxyphenyl)-3-methyl-5-nitro-1*H*-indazole (**11c**)

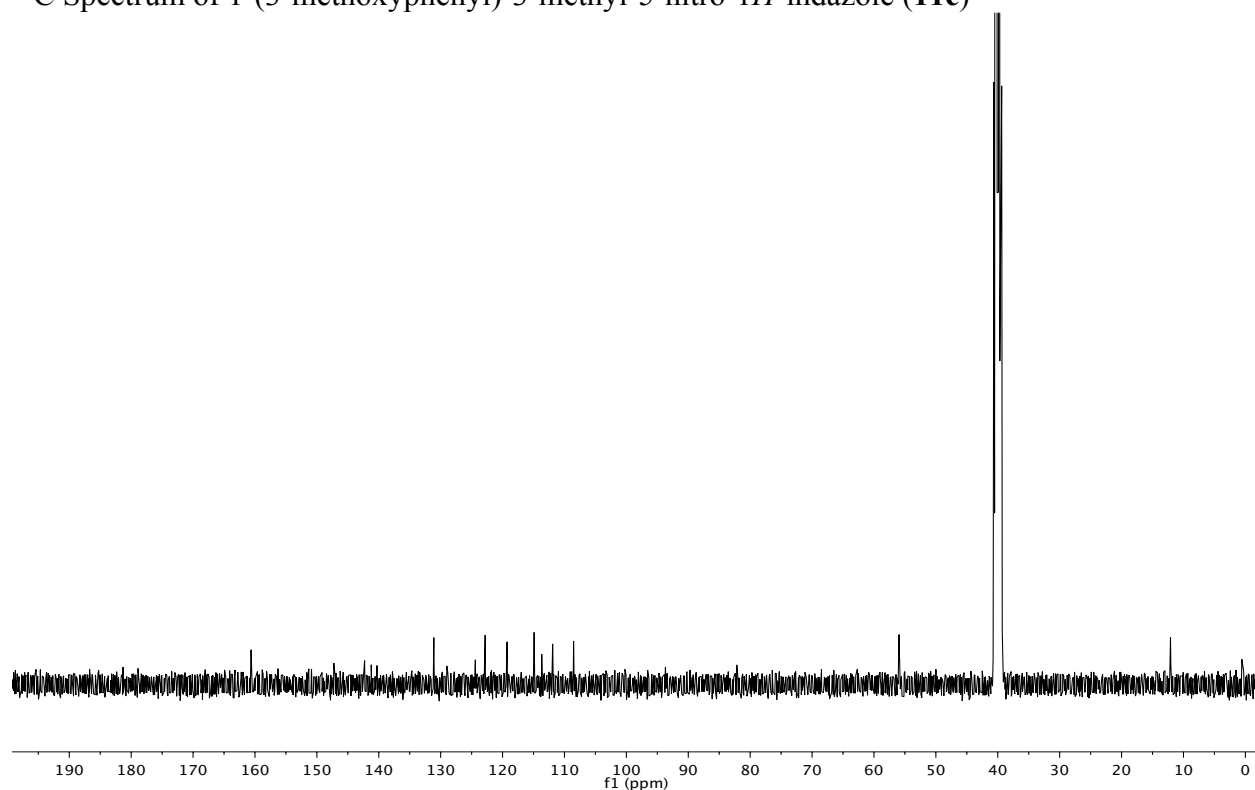

<sup>1</sup>H Spectra of 1-(4-methoxyphenyl)-3-methyl-5-nitro-1*H*-indazole (**11d**)

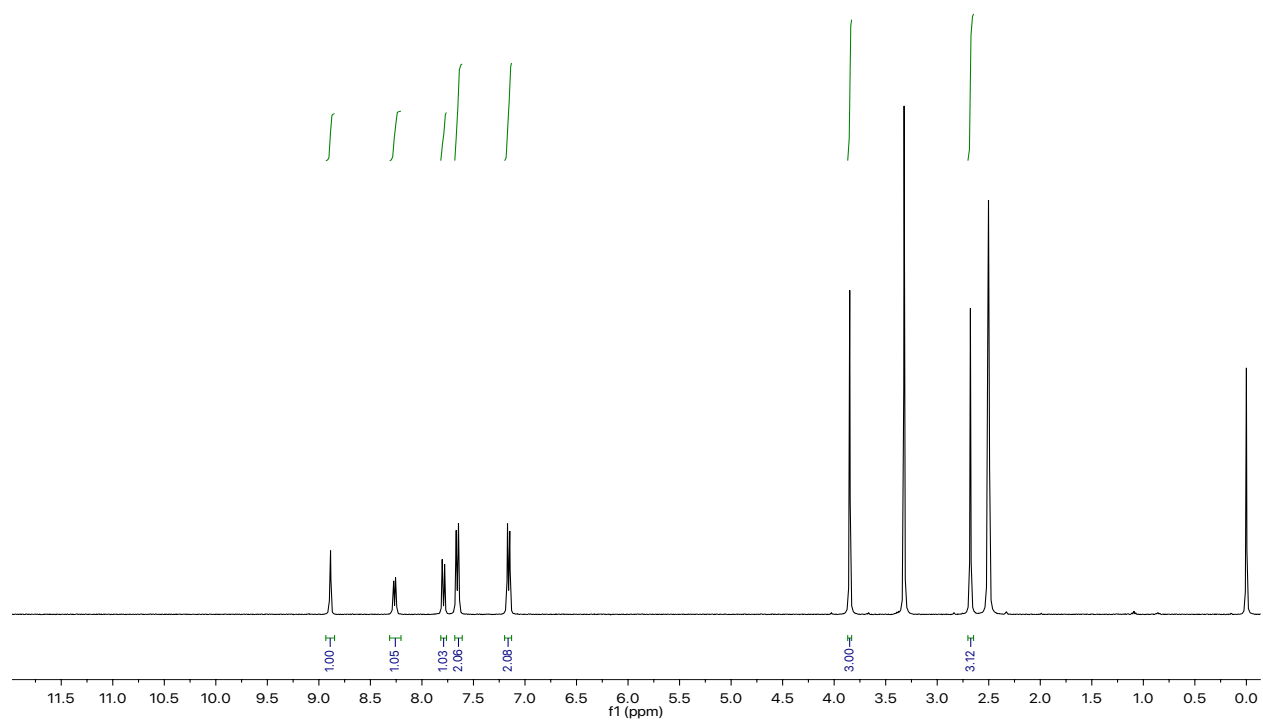

<sup>13</sup>C Spectrum of 1-(4-methoxyphenyl)-3-methyl-5-nitro-1*H*-indazole (**11d**)

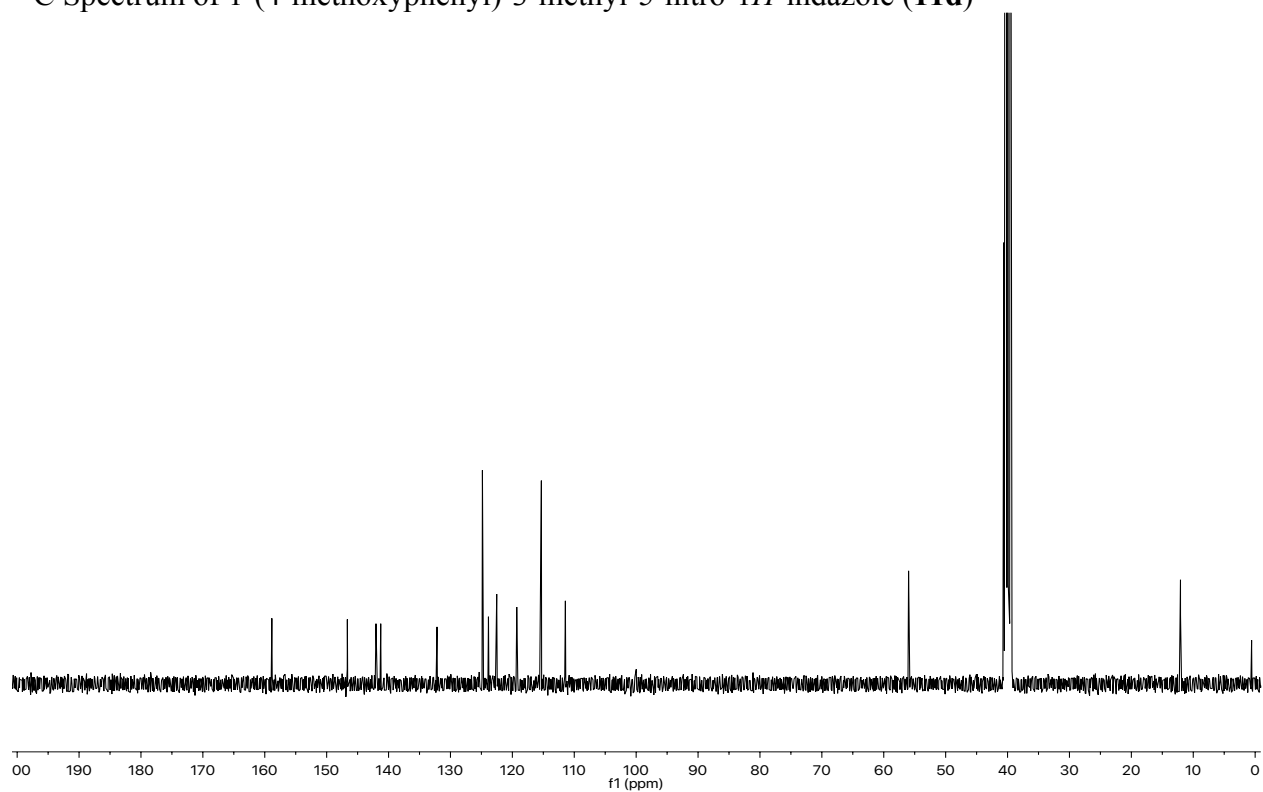

<sup>1</sup>H Spectrum of 1-(4-bromophenyl)-3-methyl-5-nitro-1*H*-indazole (**11e**)

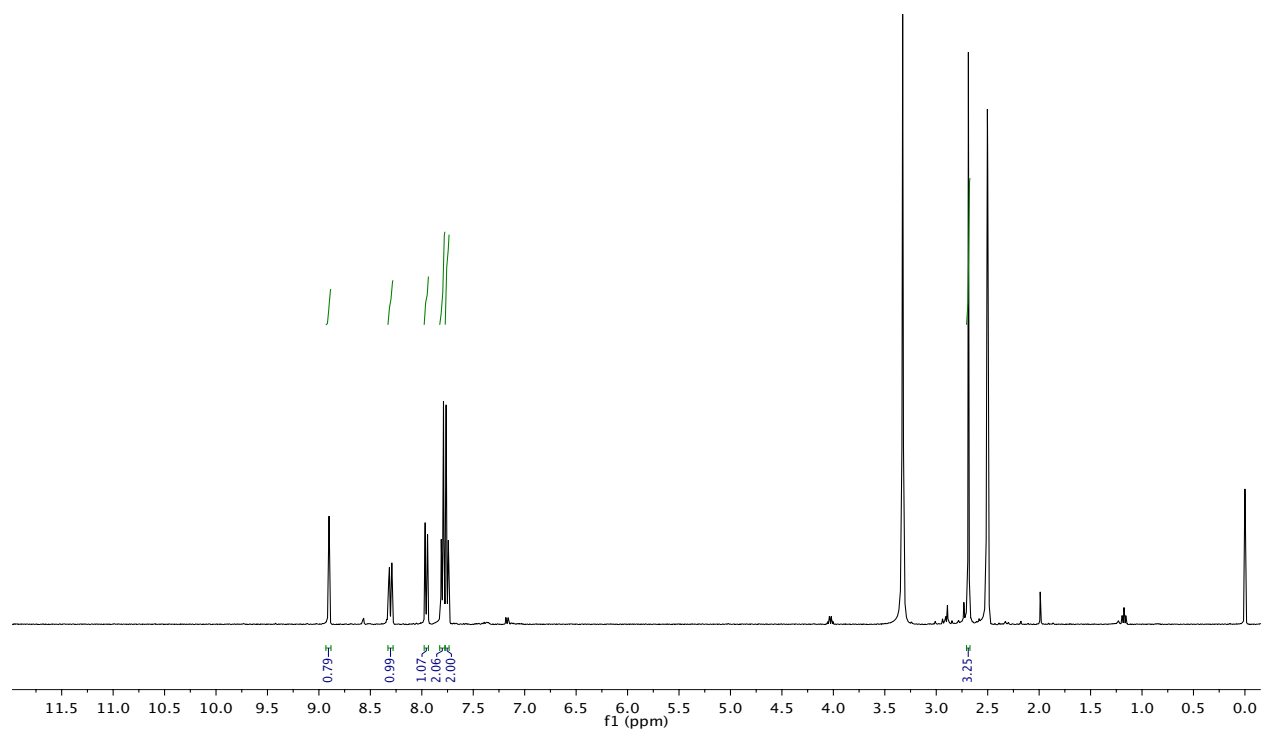

<sup>13</sup>C Spectrum of 1-(4-bromophenyl)-3-methyl-5-nitro-1*H*-indazole (**11e**)

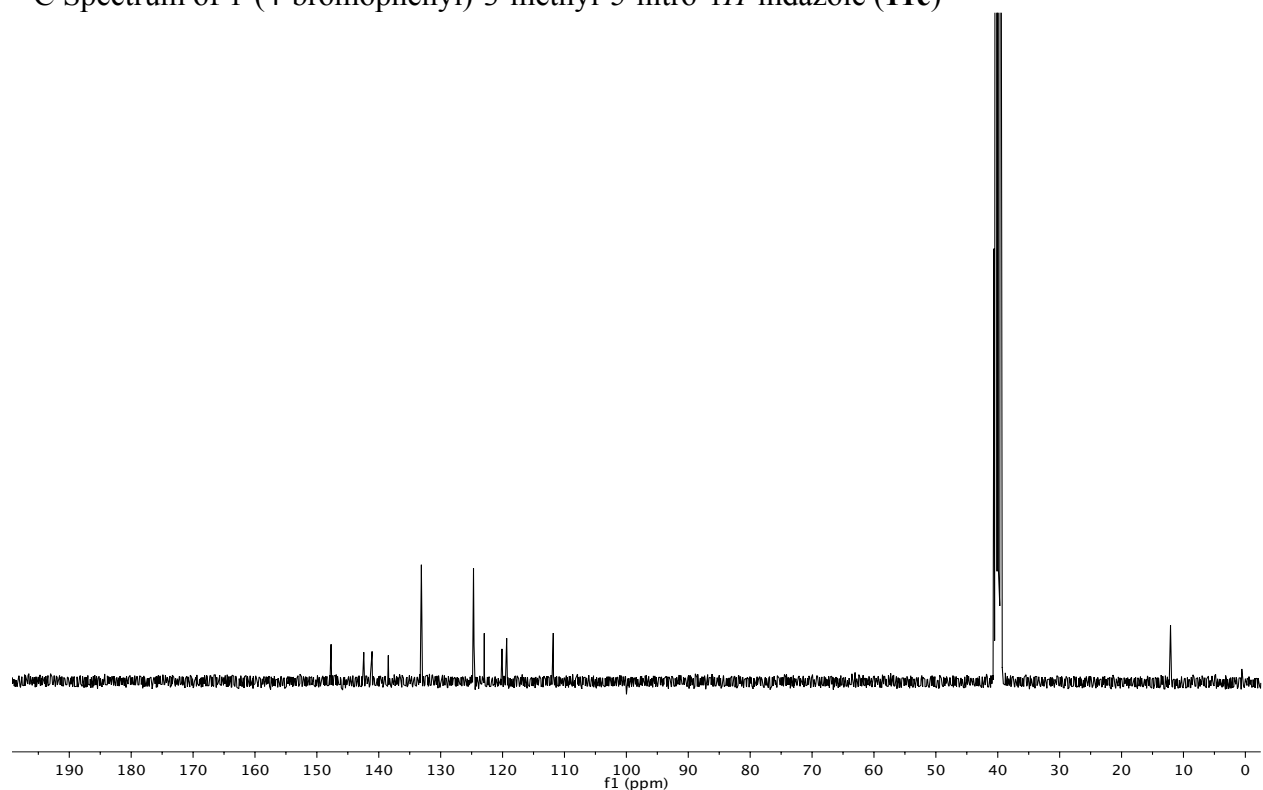

<sup>1</sup>H Spectrum of 1-(3-chlorophenyl)-3-methyl-5-nitro-1*H*-indazole (**11f**)

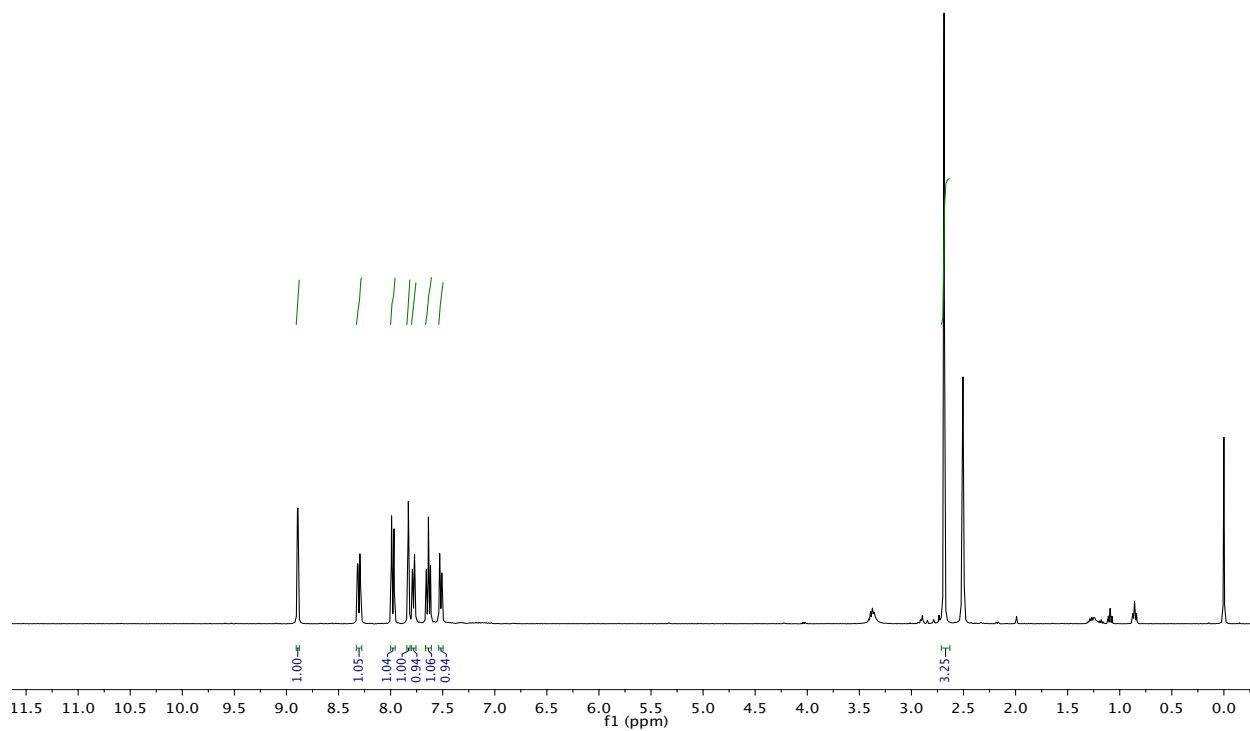

<sup>13</sup>C Spectrum of 1-(3-chlorophenyl)-3-methyl-5-nitro-1*H*-indazole (**11f**)

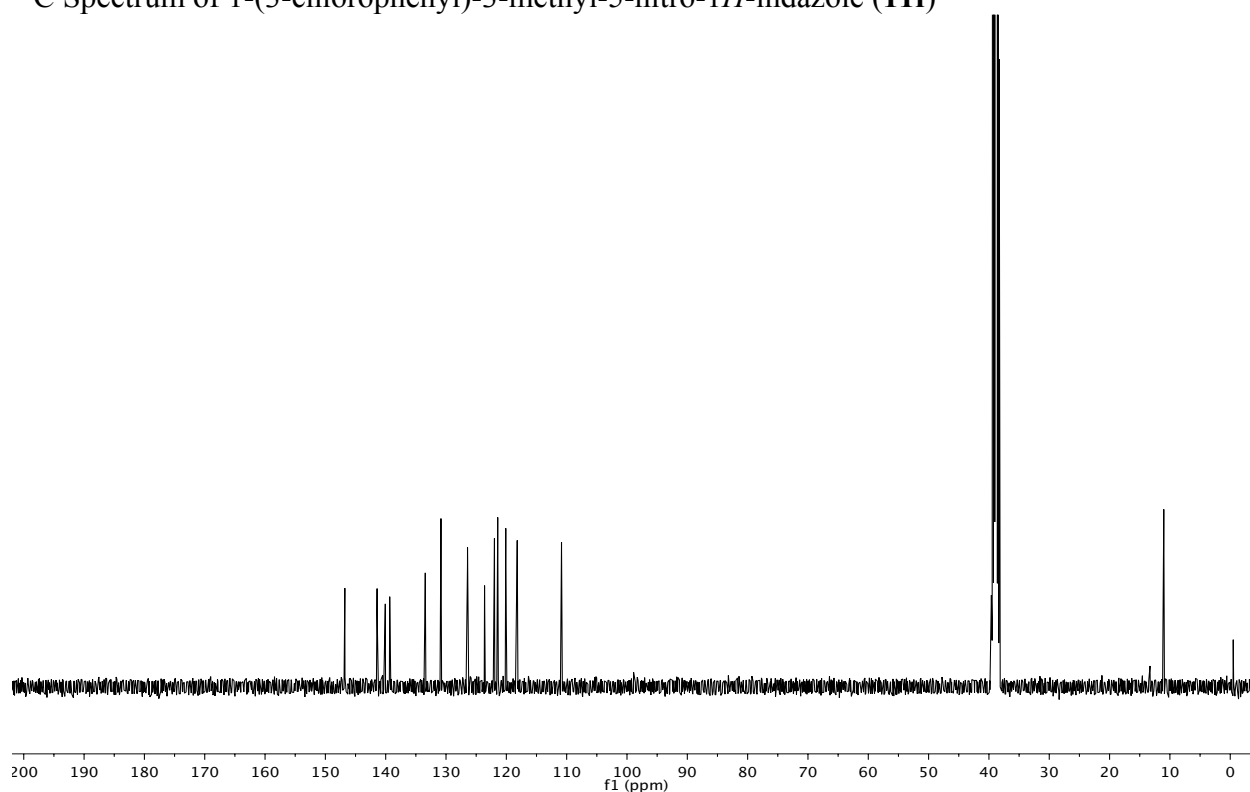

<sup>1</sup>H Spectrum of 1-(4-chlorophenyl)-3-methyl-5-nitro-1*H*-indazole (**11g**)

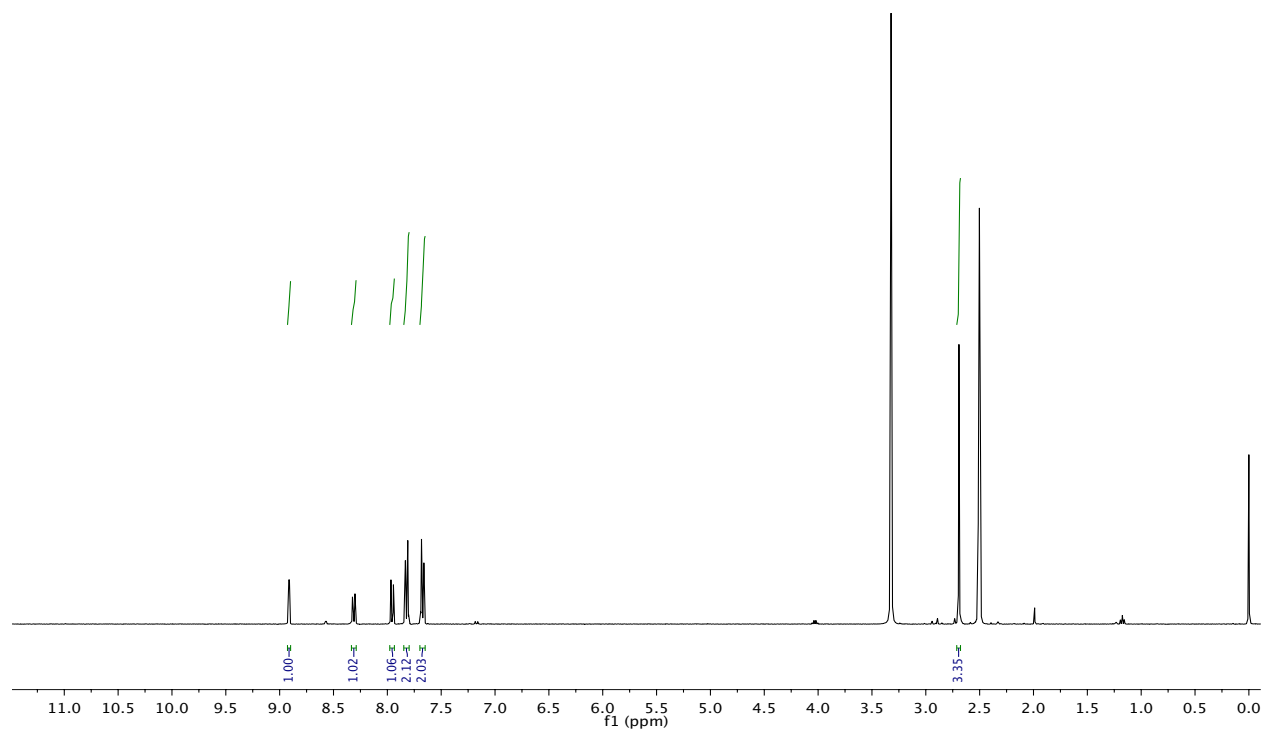

<sup>13</sup>C Spectrum of 1-(4-chlorophenyl)-3-methyl-5-nitro-1*H*-indazole (**11g**)

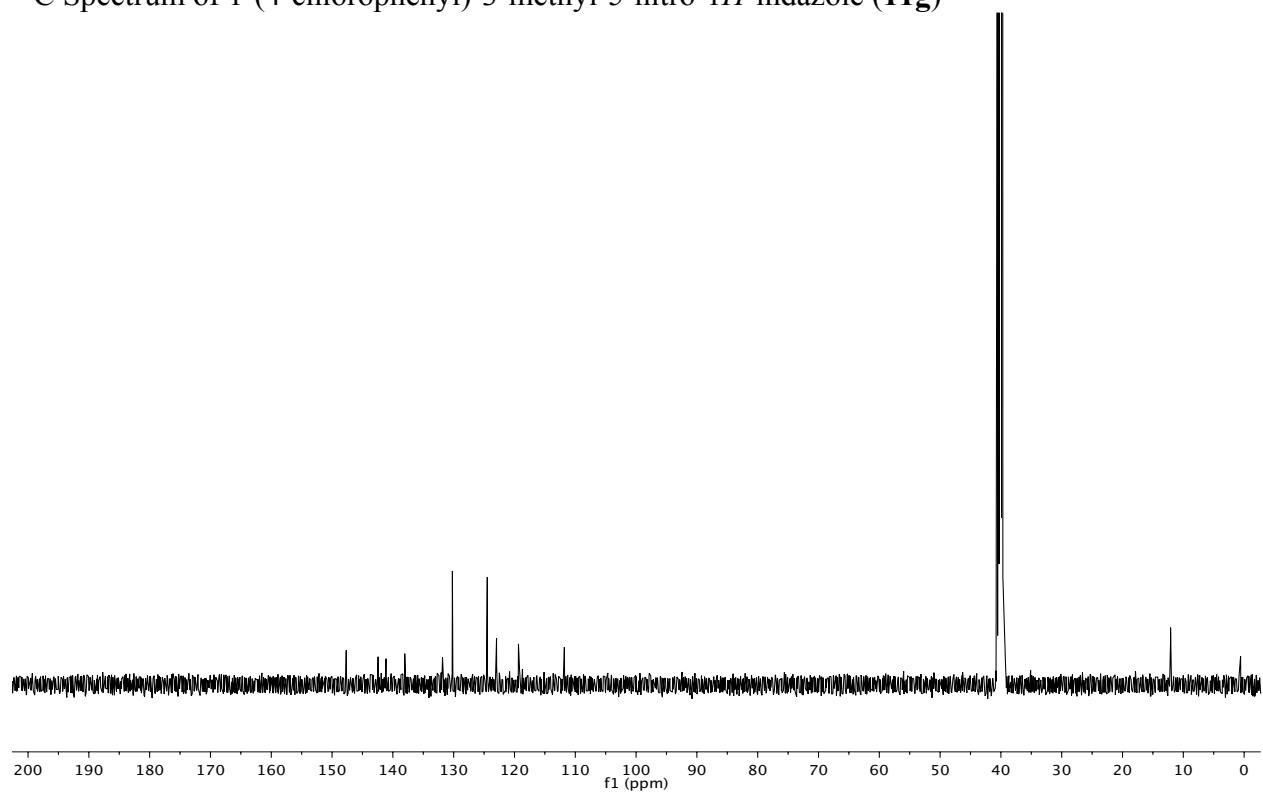

<sup>1</sup>H Spectrum of 1-(2,4-dichlorophenyl)-3-methyl-5-nitro-1*H*-indazole (**11h**)

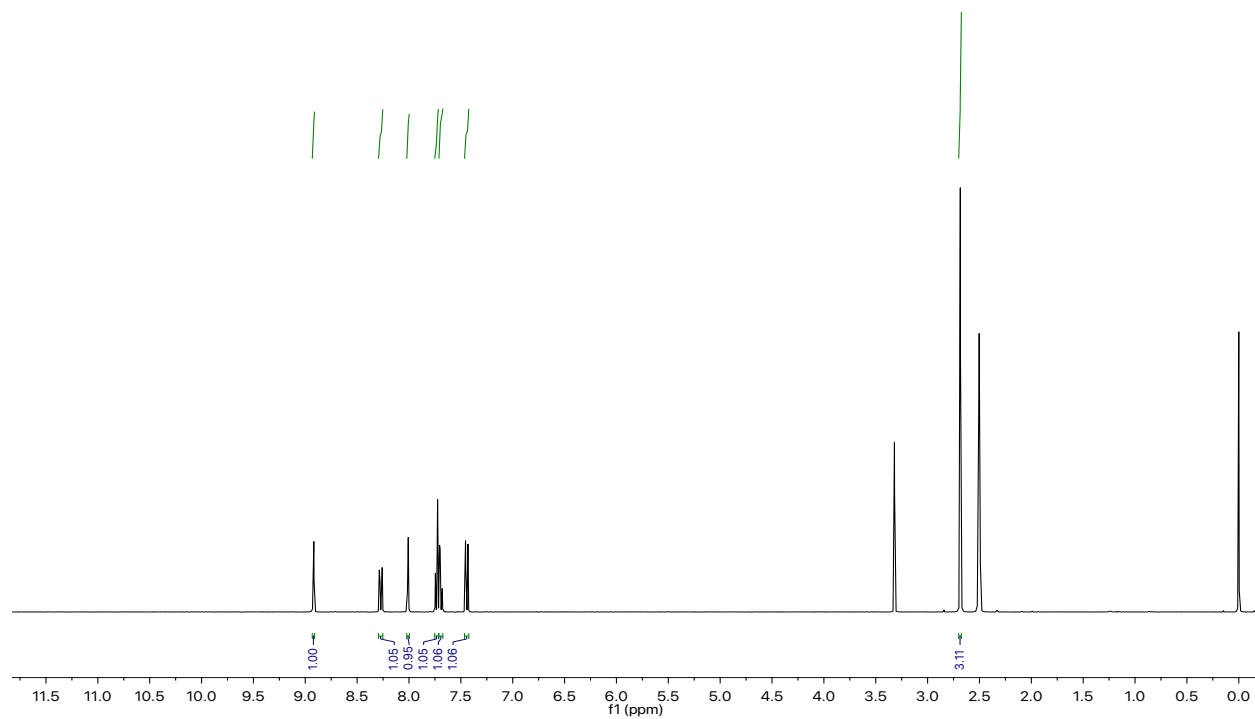

<sup>13</sup>C Spectrum of 1-(2,4-dichlorophenyl)-3-methyl-5-nitro-1*H*-indazole (**11h**)

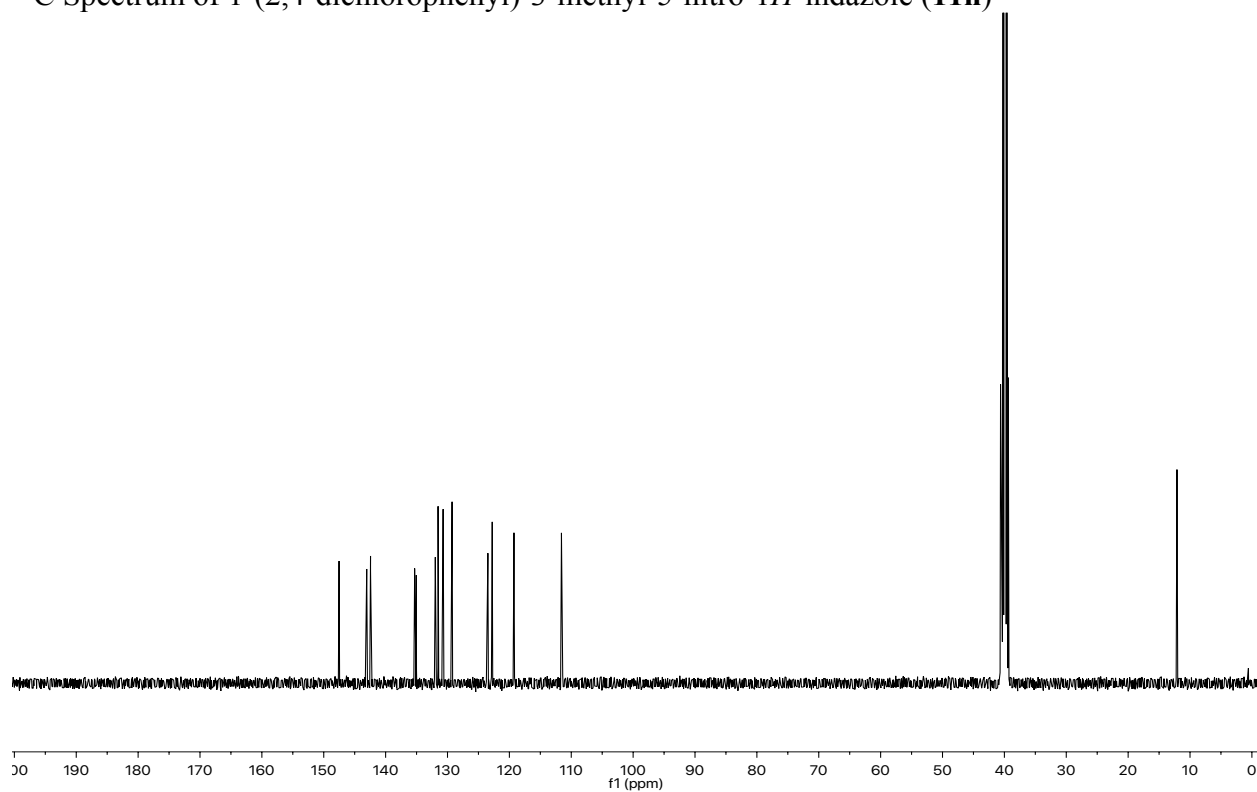



<sup>1</sup>H Spectrum of 3-methyl-5-nitro-1-(3-(trifluoromethyl)phenyl)-1*H*-indazole (**11i**)

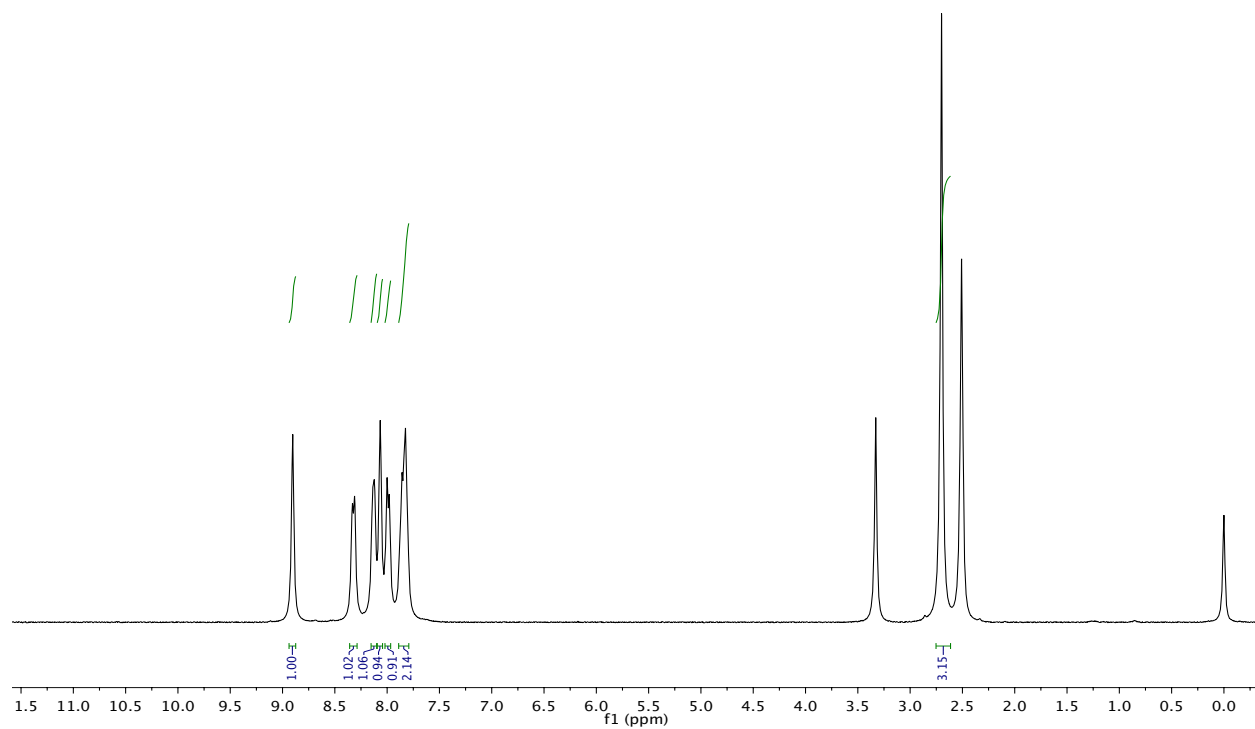

<sup>13</sup>C Spectrum of 3-methyl-5-nitro-1-(3-(trifluoromethyl)phenyl)-1*H*-indazole (**11i**)

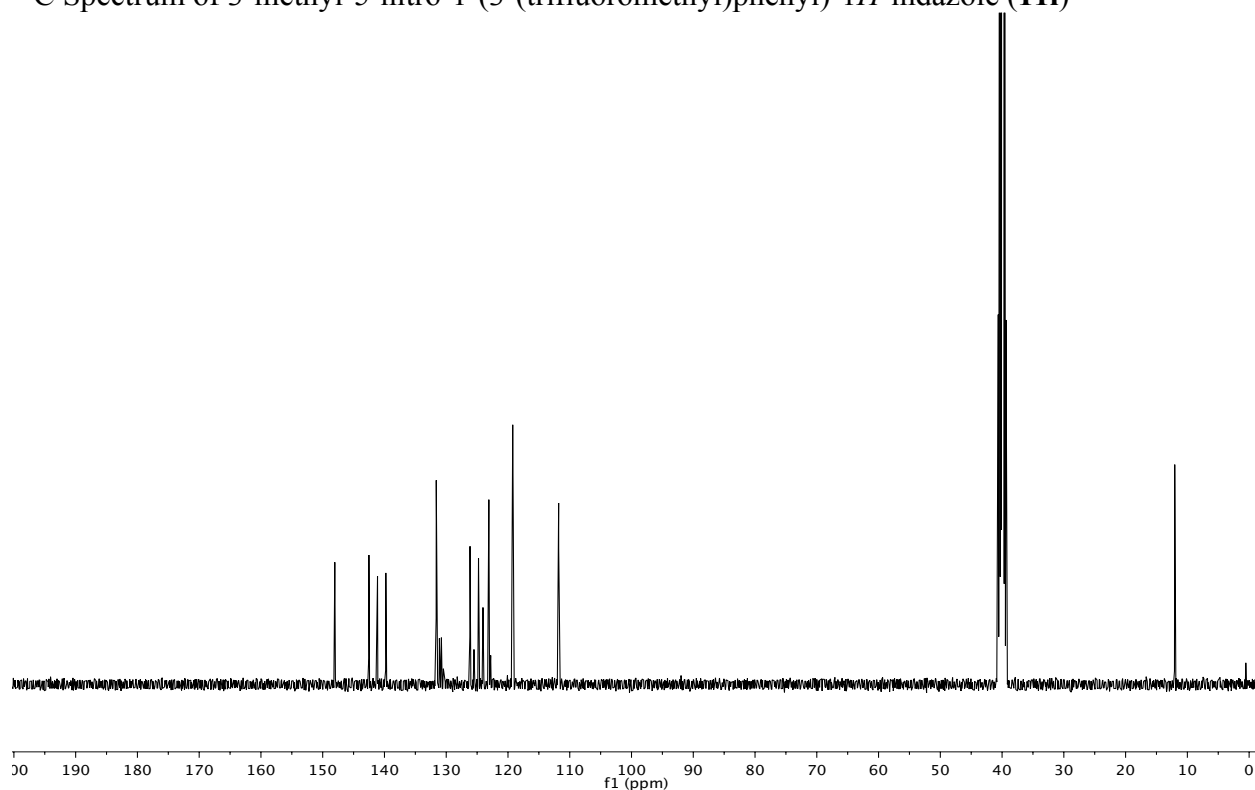

<sup>1</sup>H Spectra of 3-methyl-5-nitro-1-(4-(trifluoromethyl)phenyl)-1*H*-indazole (**11j**)

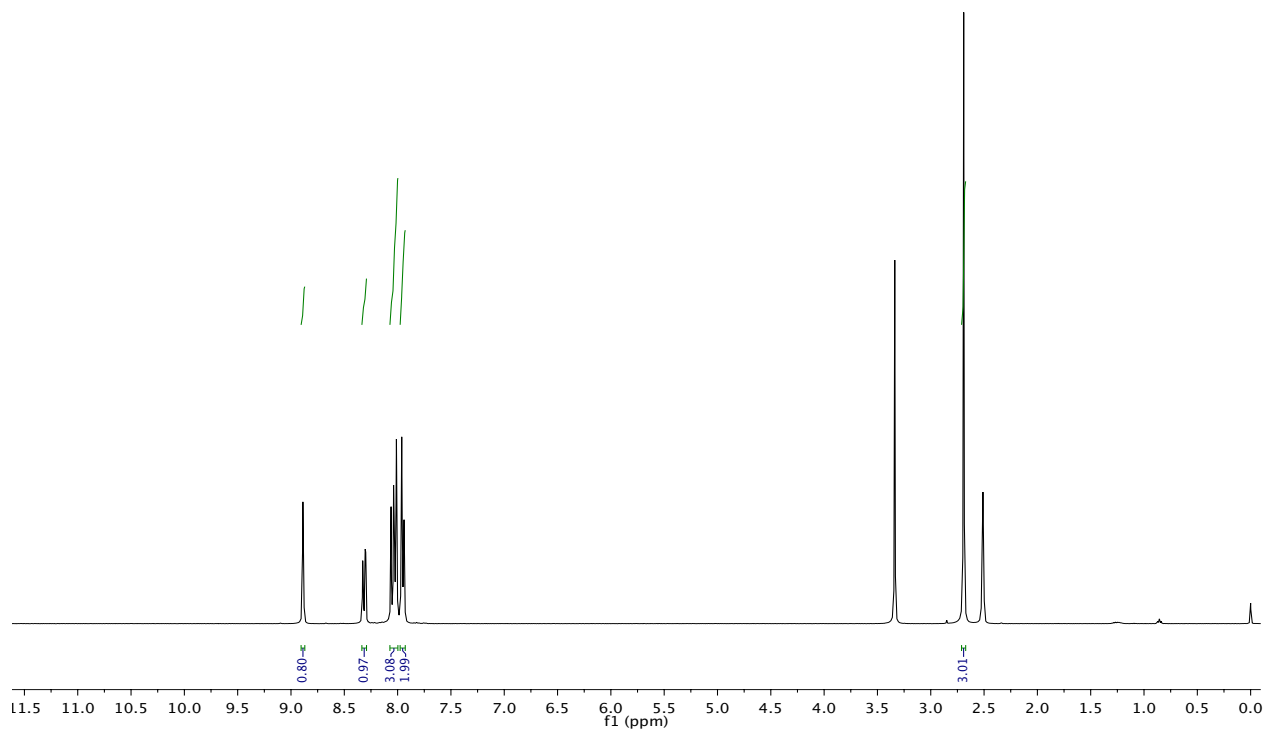

<sup>13</sup>C Spectra of 3-methyl-5-nitro-1-(4-(trifluoromethyl)phenyl)-1*H*-indazole (**11j**)

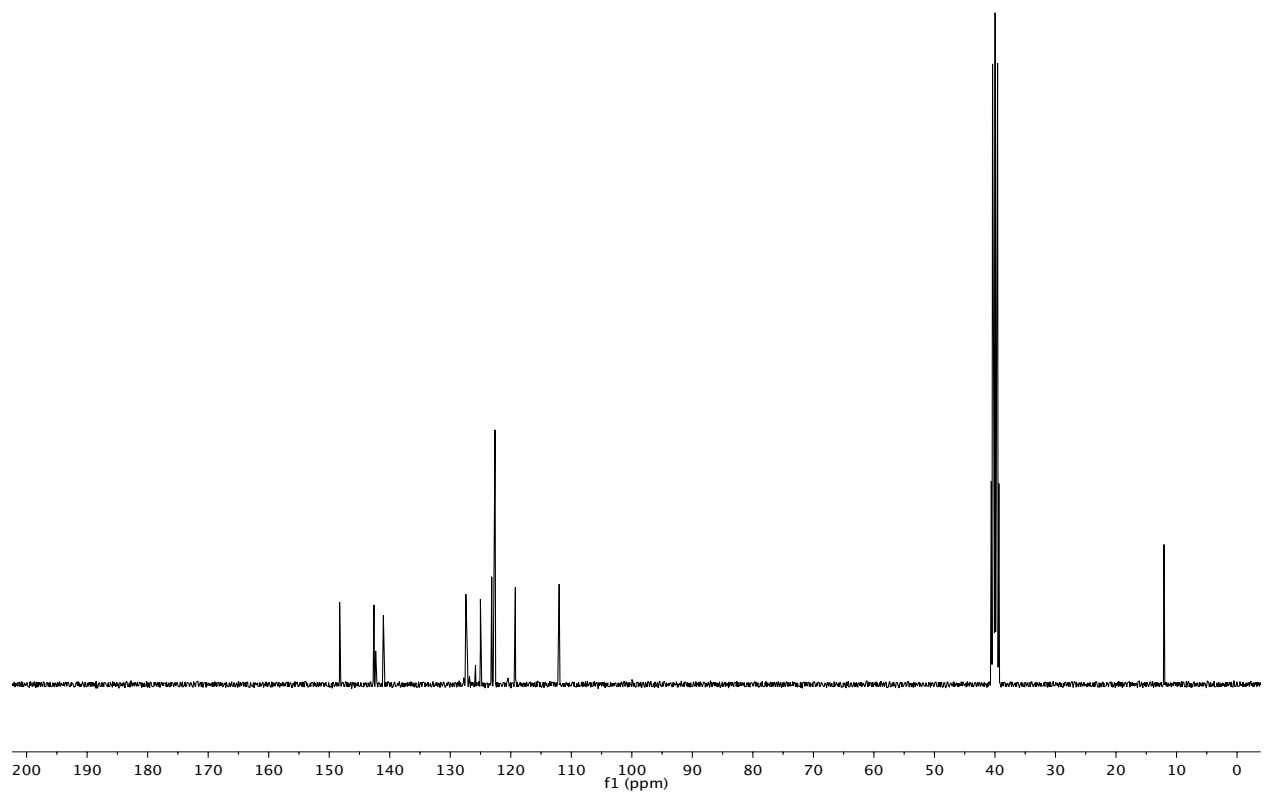

<sup>1</sup>H Spectrum of 1-(4-cyanophenyl)-3-methyl-5-nitro-1*H*-indazole (**11k**)

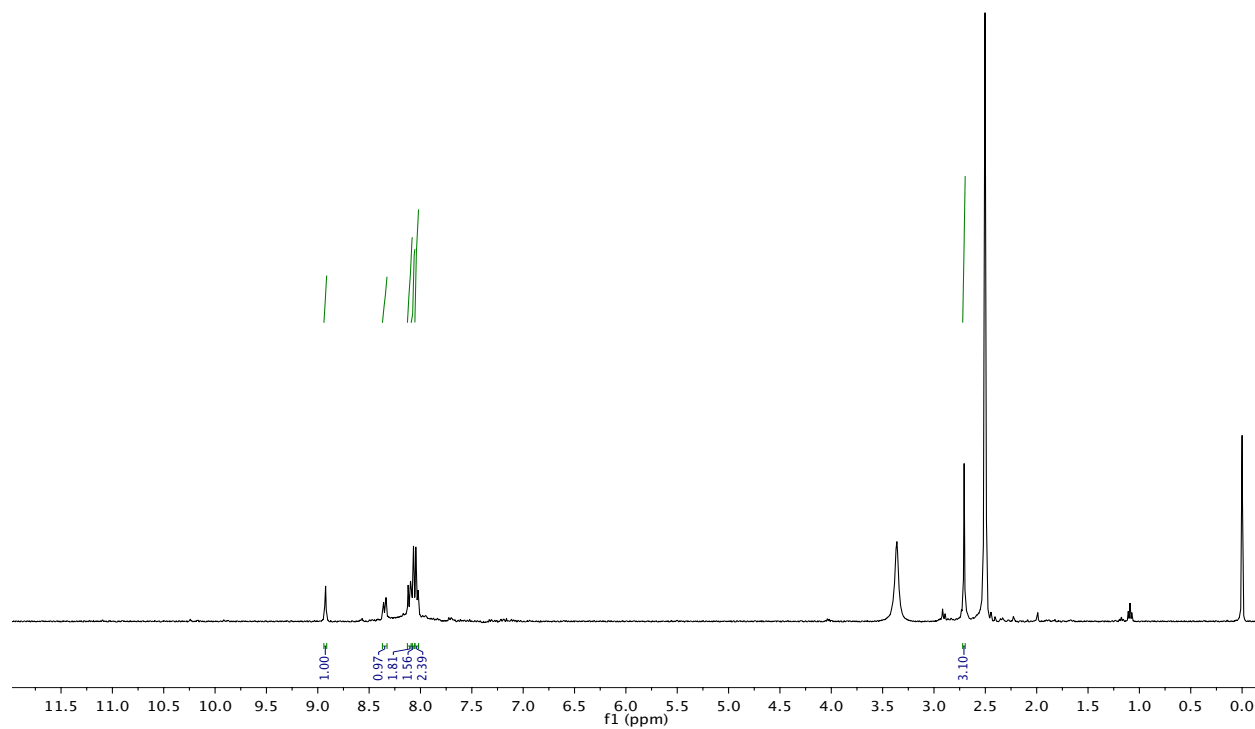

<sup>13</sup>C Spectrum of 1-(4-cyanophenyl)-3-methyl-5-nitro-1*H*-indazole (**11k**)

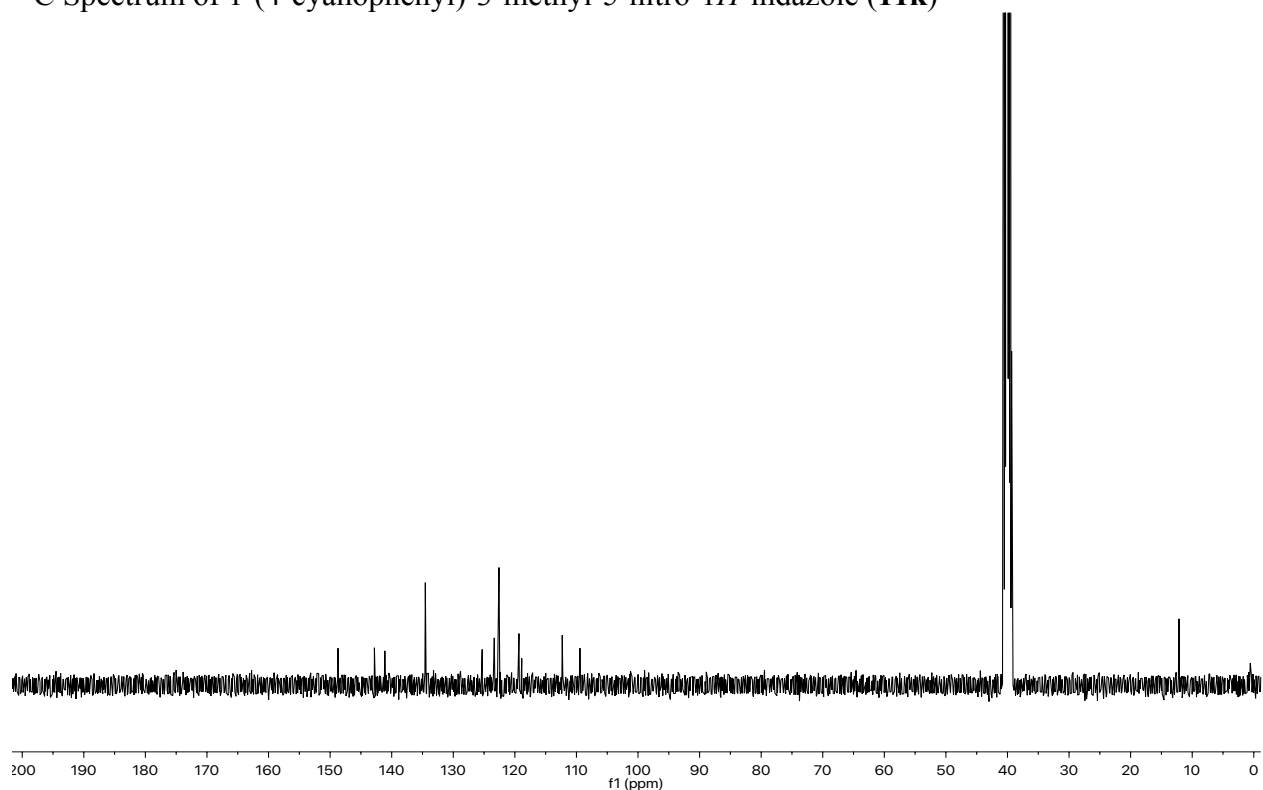

<sup>1</sup>H Spectrum of 4-(3-methyl-5-nitro-1*H*-indazol-1-yl)benzenesulfonamide (**11**)

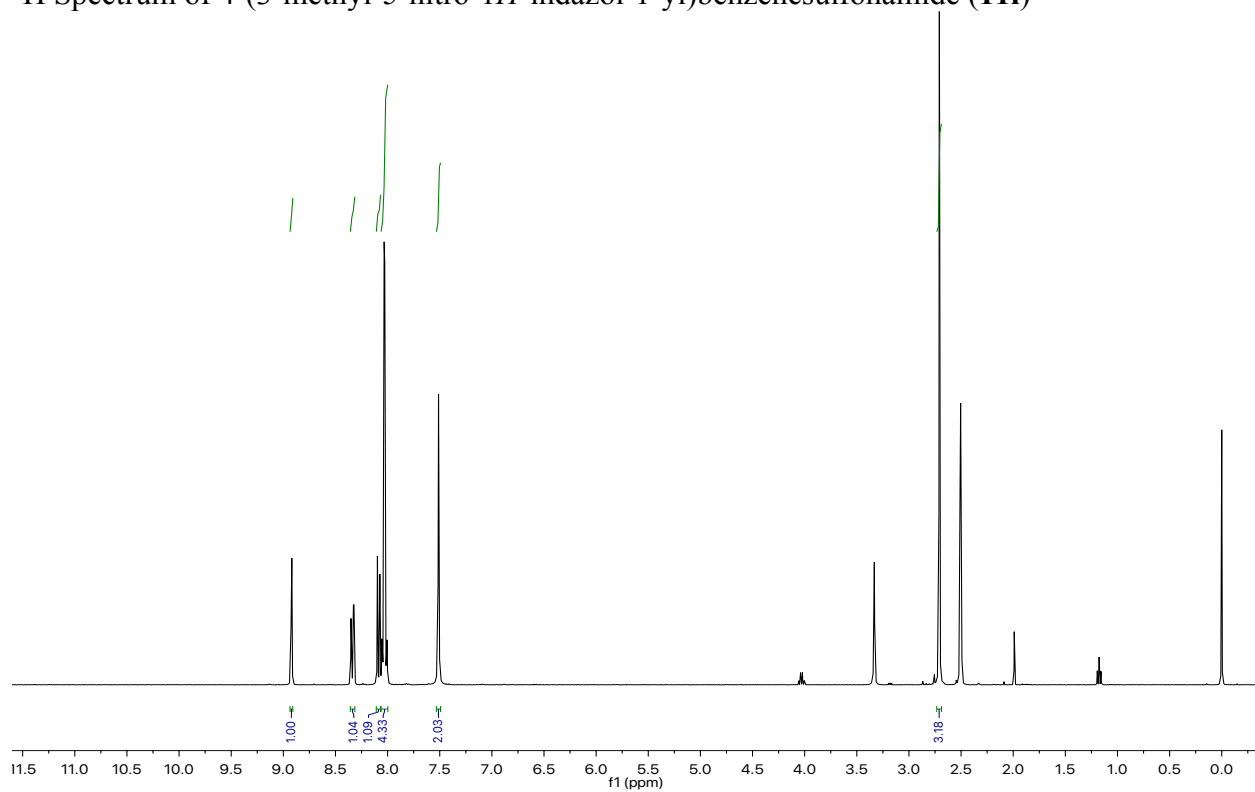

<sup>13</sup>C Spectrum of 4-(3-methyl-5-nitro-1*H*-indazol-1-yl)benzenesulfonamide (**11**)

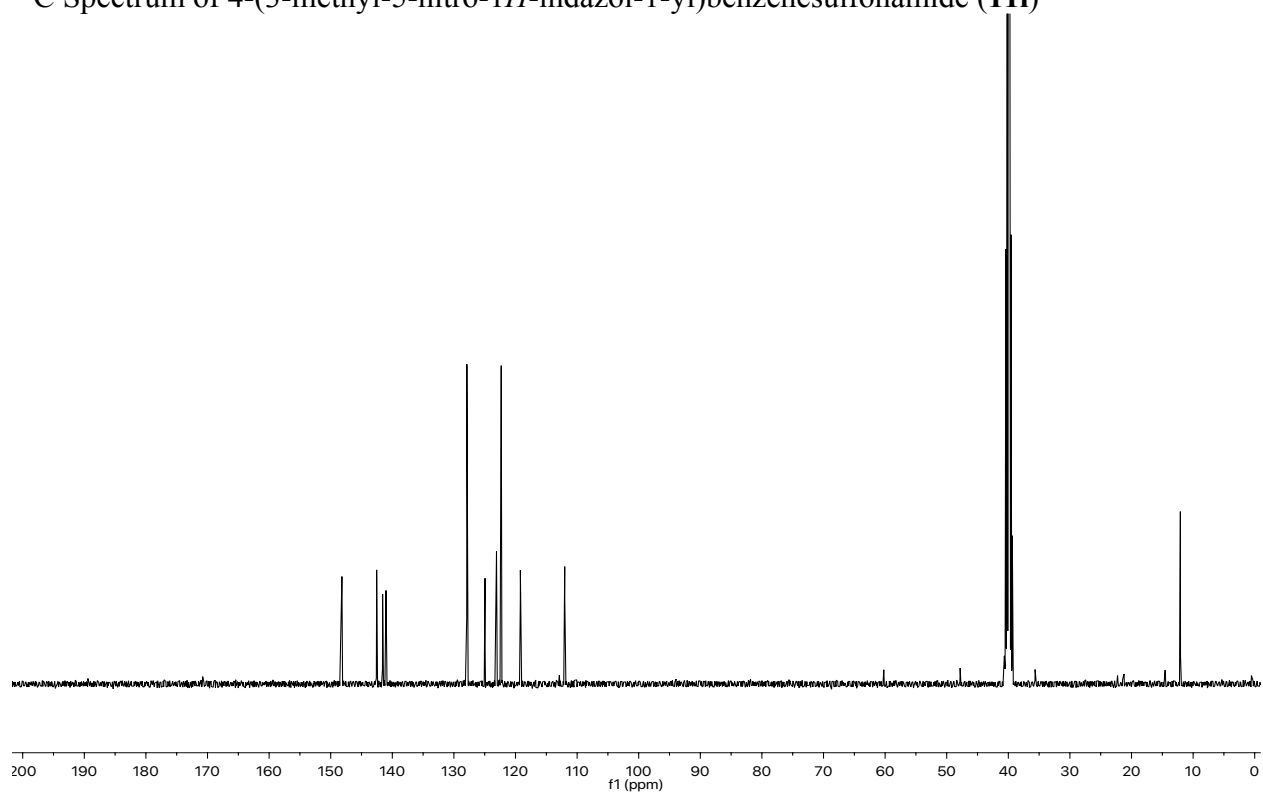

<sup>1</sup>H Spectrum of 4-(3-methyl-5-nitro-1*H*-indazol-1-yl)benzoic acid (**11m**)

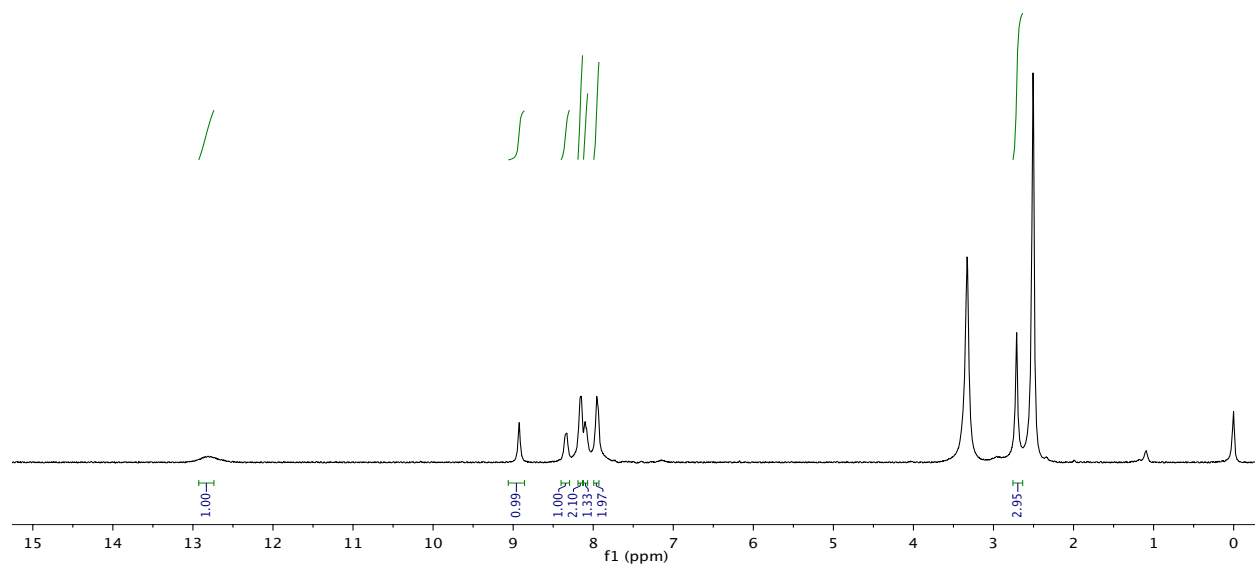

<sup>13</sup>C Spectrum of 4-(3-methyl-5-nitro-1*H*-indazol-1-yl)benzoic acid (**11m**)

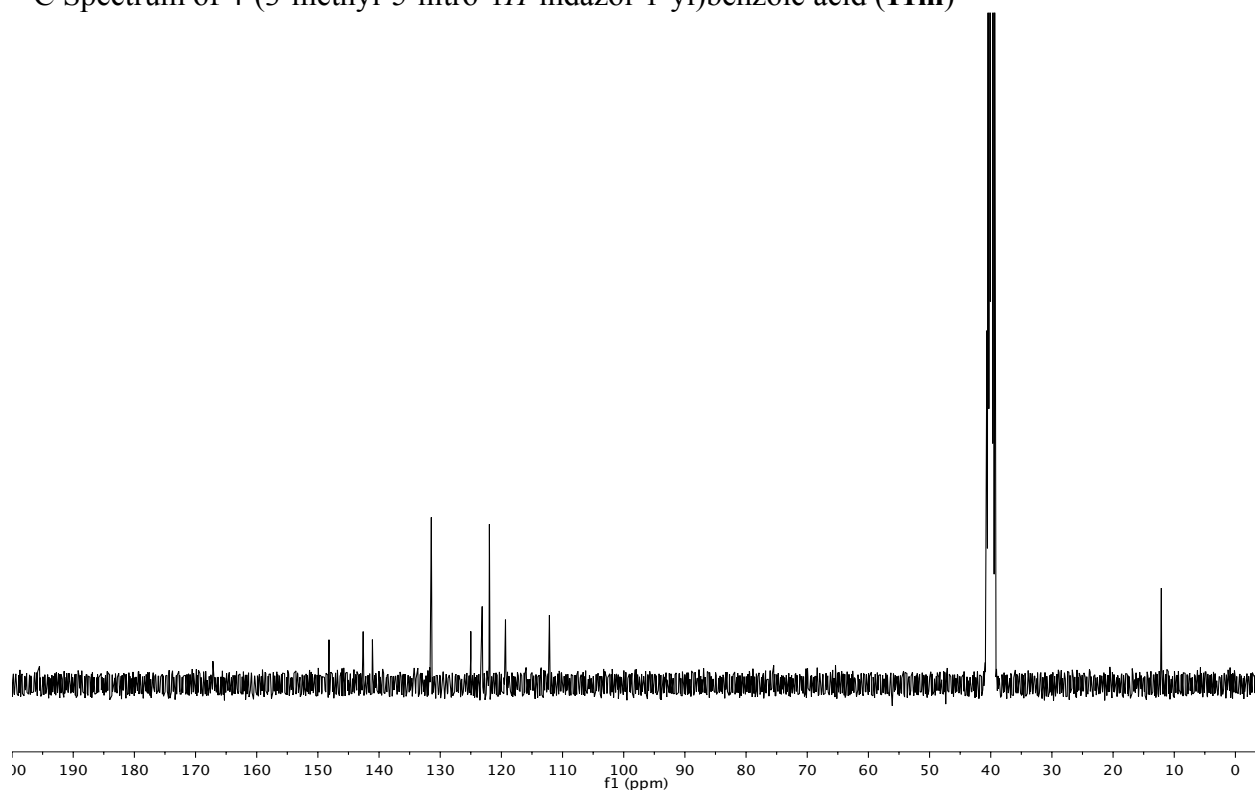

<sup>1</sup>H Spectrum of 1-phenyl-5-nitro-1*H*-indazole (**12a**)

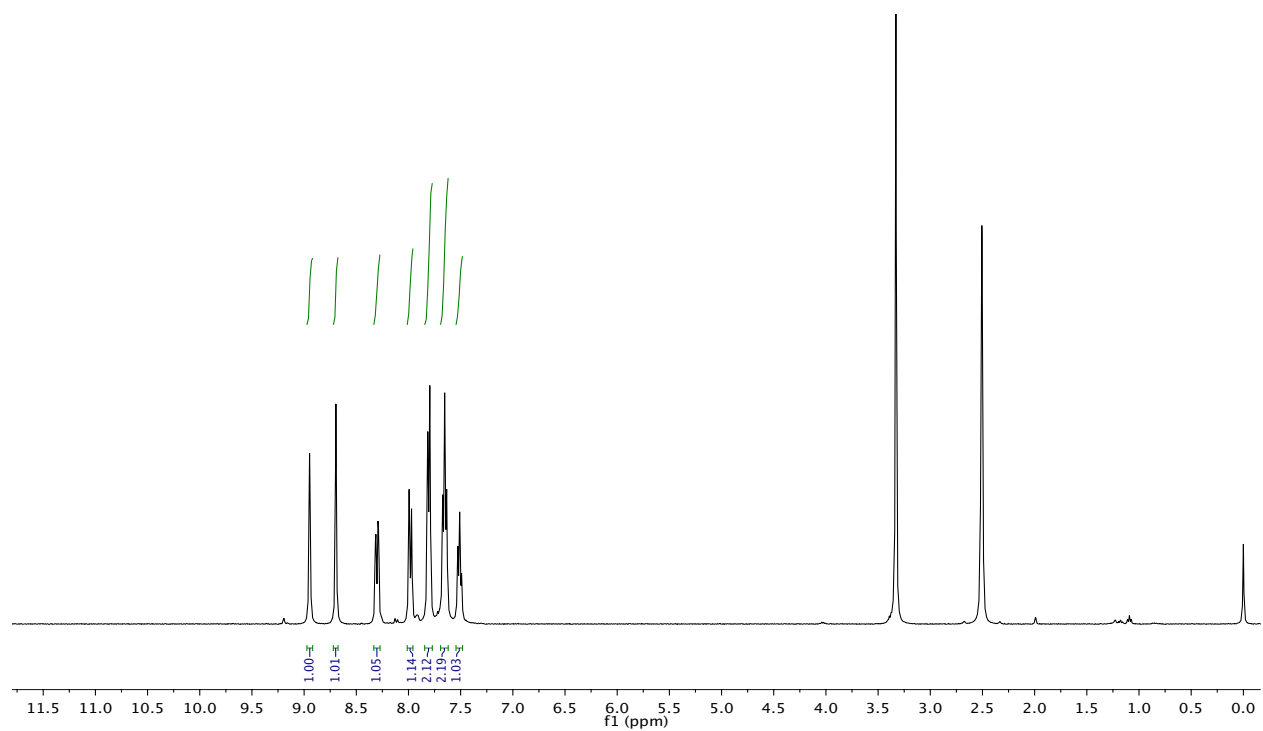

<sup>13</sup>C Spectrum of 1-phenyl-5-nitro-1*H*-indazole (**12a**)

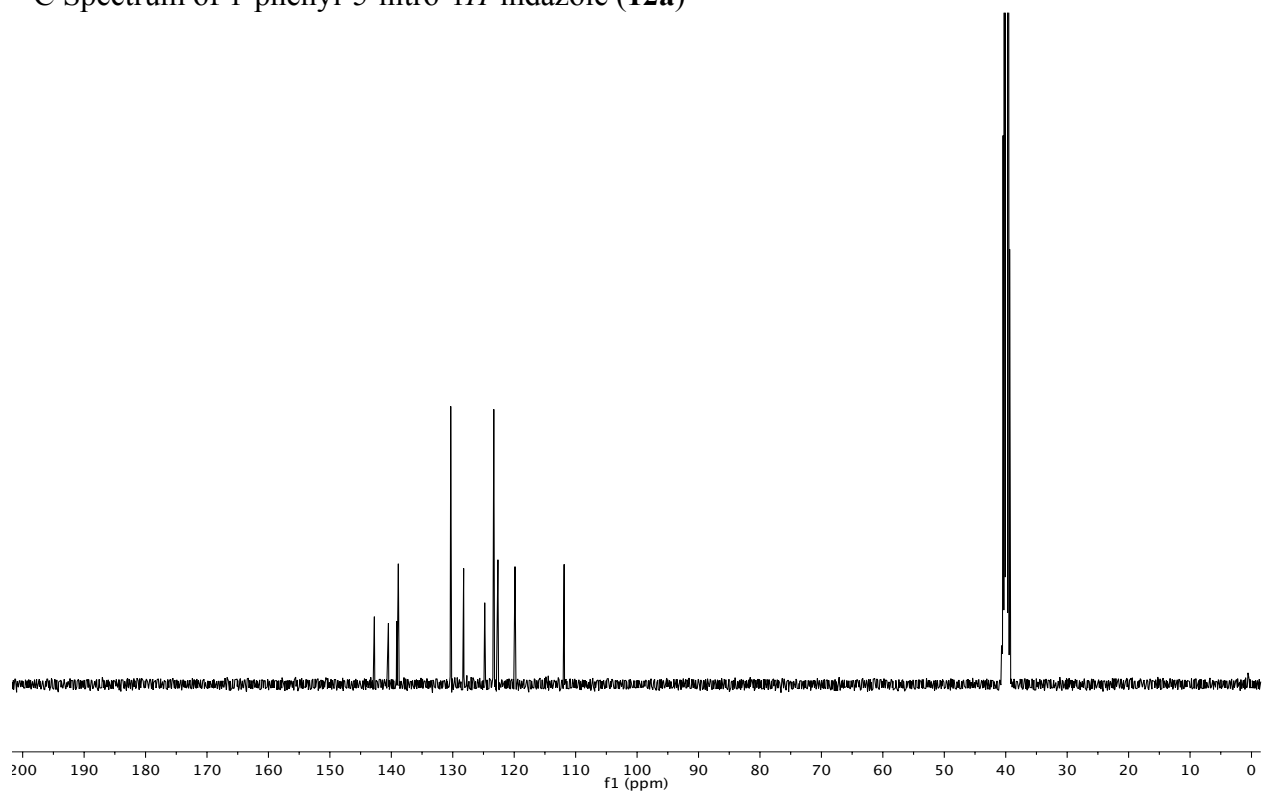

<sup>1</sup>H Spectra of 1-(3-methoxyphenyl)-5-nitro-1*H*-indazole (**12c**)

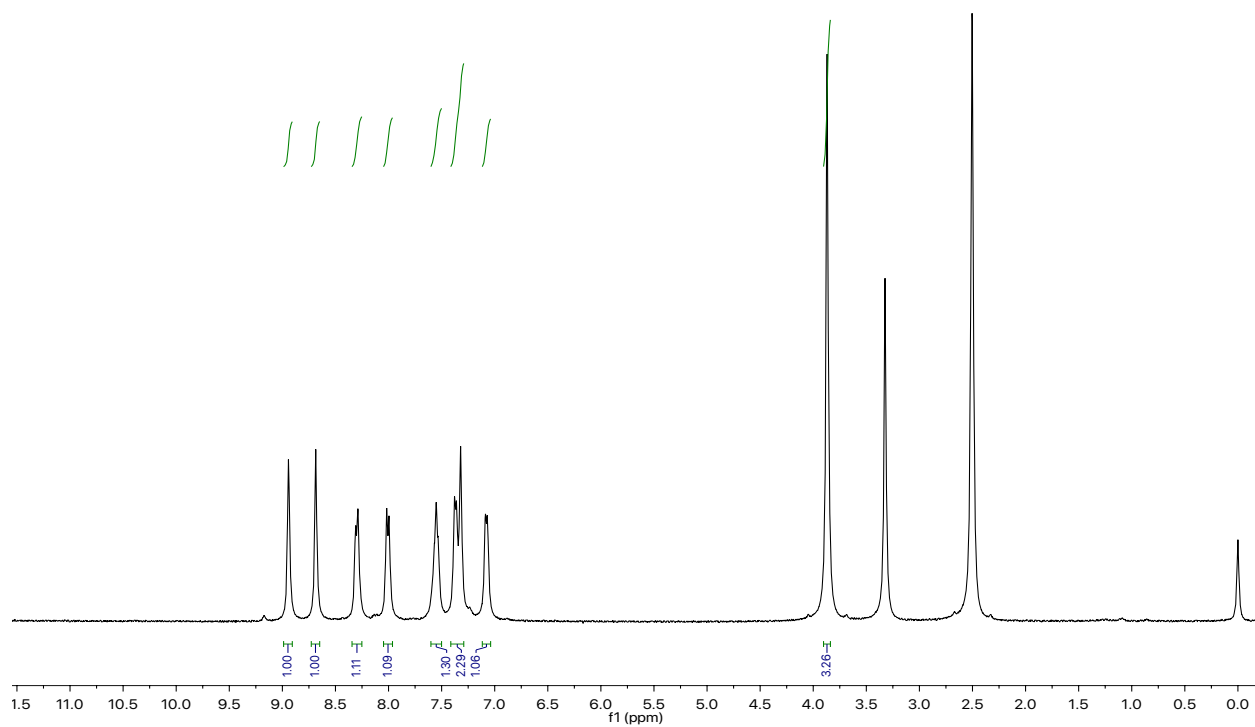

<sup>13</sup>C Spectra of 1-(3-methoxyphenyl)-5-nitro-1*H*-indazole (**12c**)

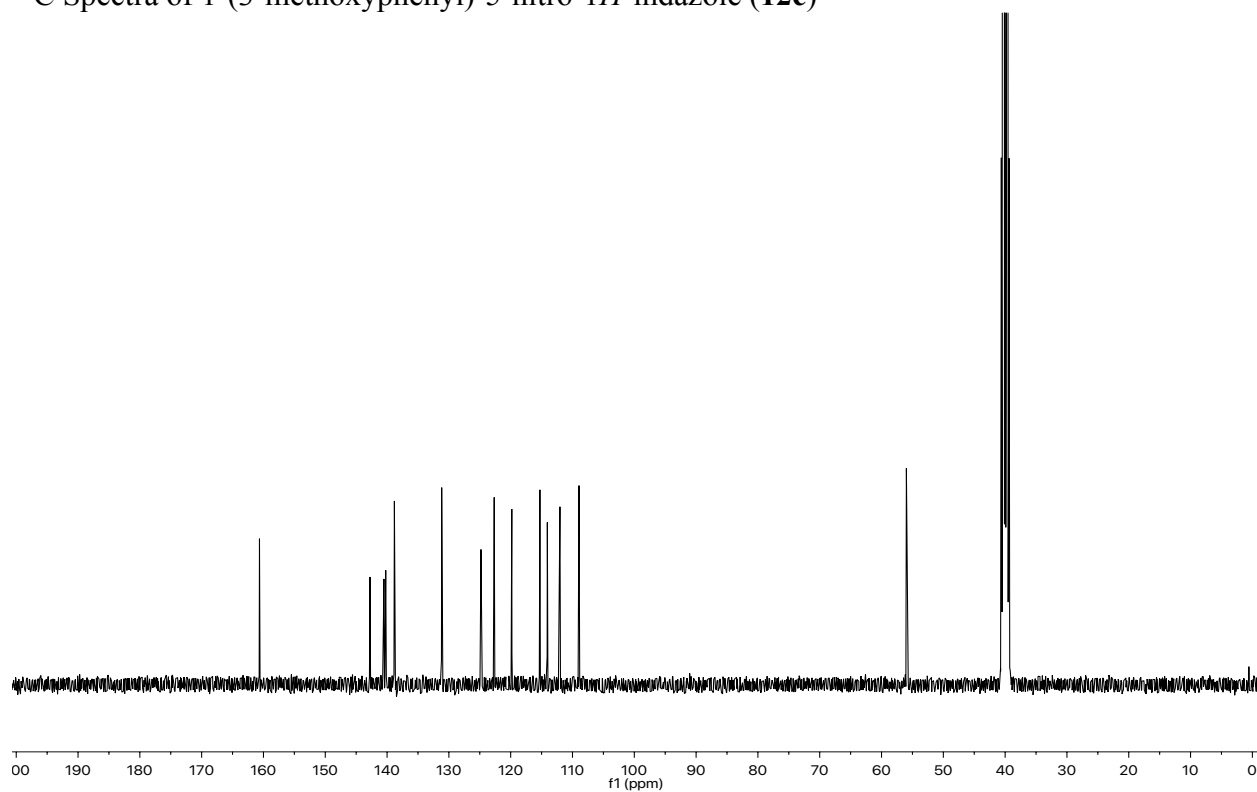

<sup>1</sup>H Spectrum of 1-(4-methoxyphenyl)-5-nitro-1*H*-indazole (**12d**)

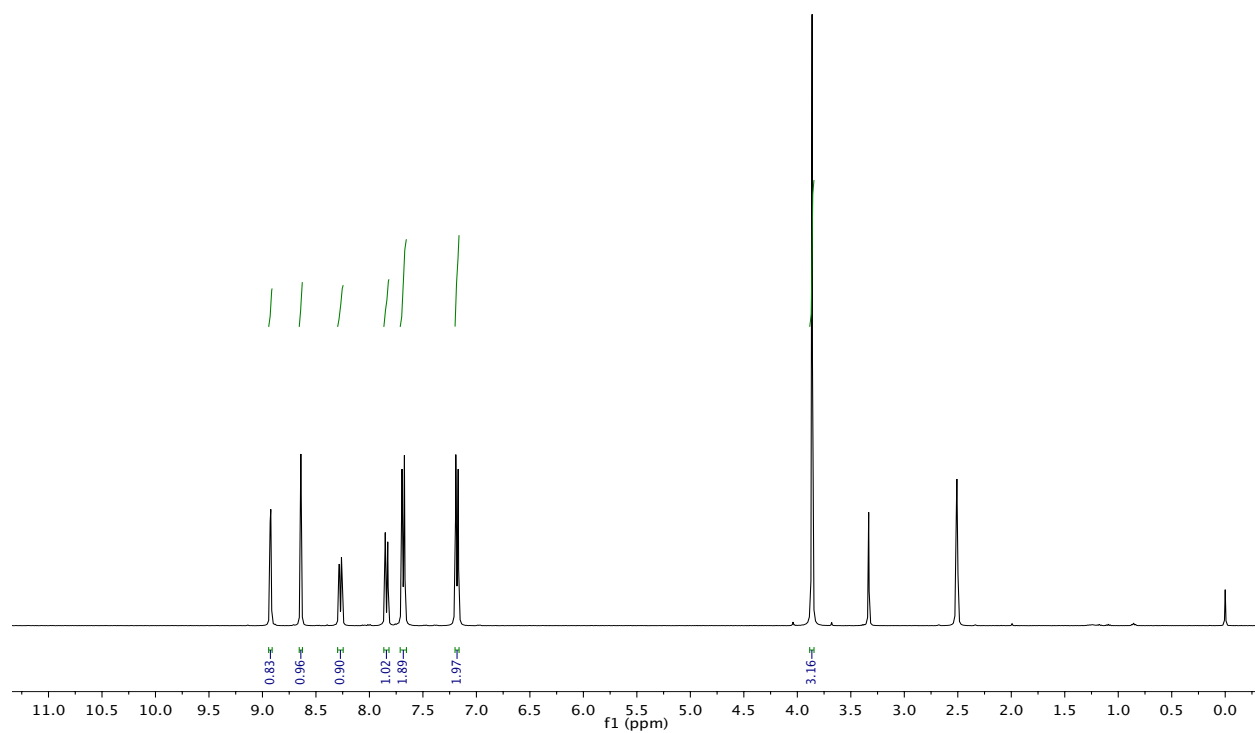

<sup>13</sup>C Spectrum of 1-(4-methoxyphenyl)-5-nitro-1*H*-indazole (**12d**)

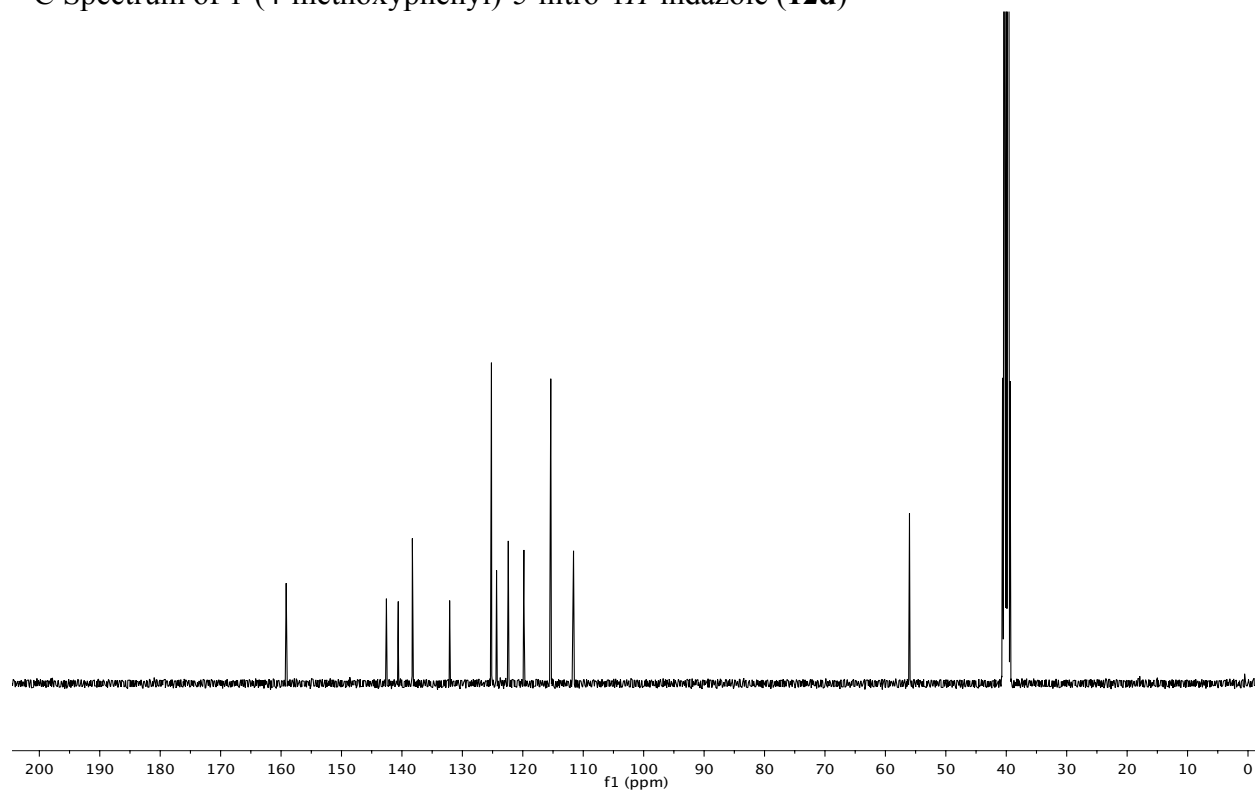



<sup>1</sup>H Spectrum of 1-(4-bromophenyl)-5-nitro-1*H*-indazole (**12e**)

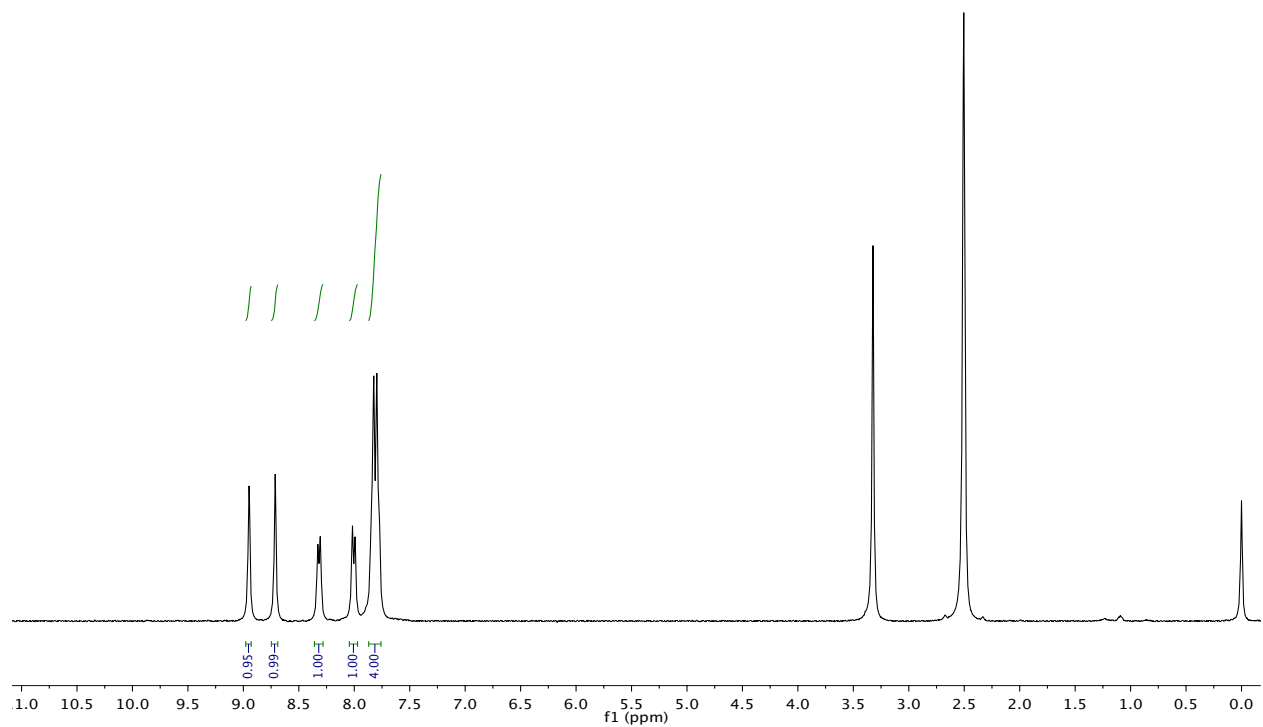

<sup>13</sup>C Spectrum of 1-(4-bromophenyl)-5-nitro-1*H*-indazole (**12e**)

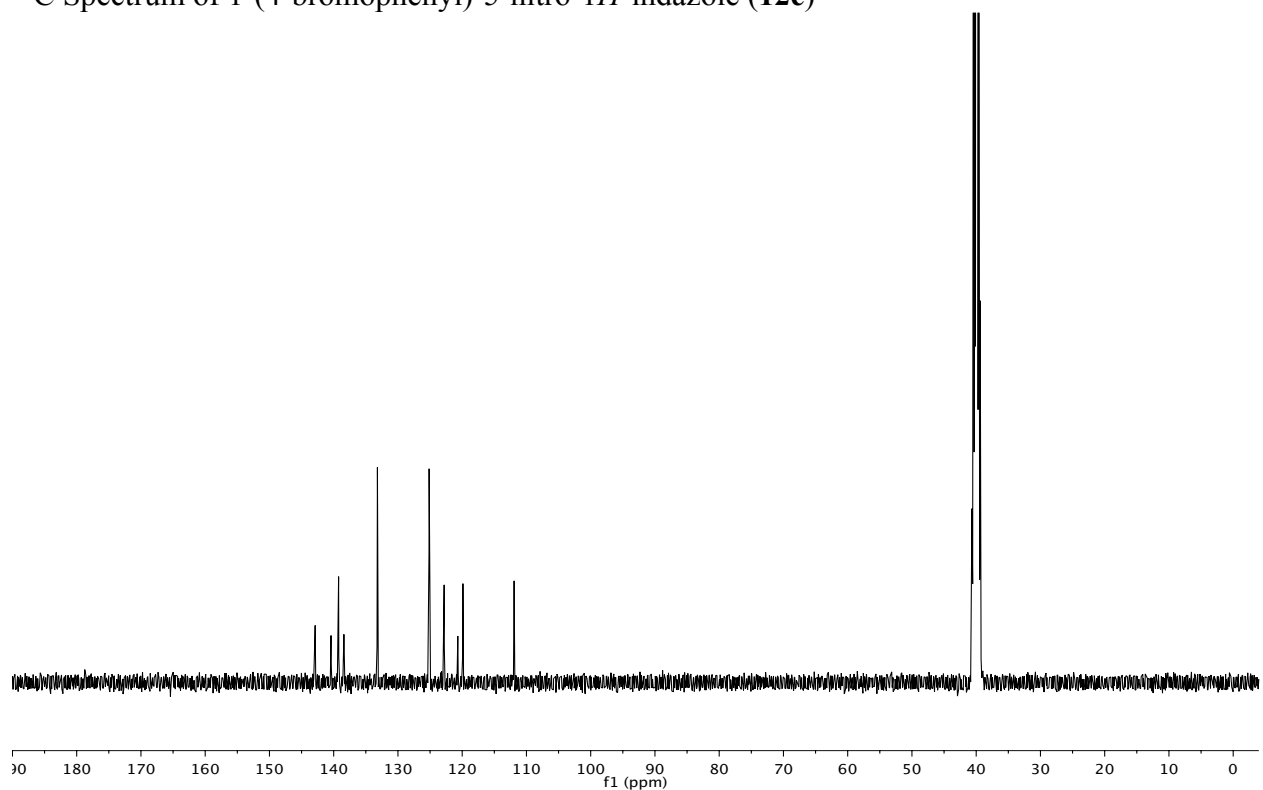

<sup>1</sup>H Spectrum of 1-(3-chlorophenyl)-5-nitro-1*H*-indazole (**12f**)

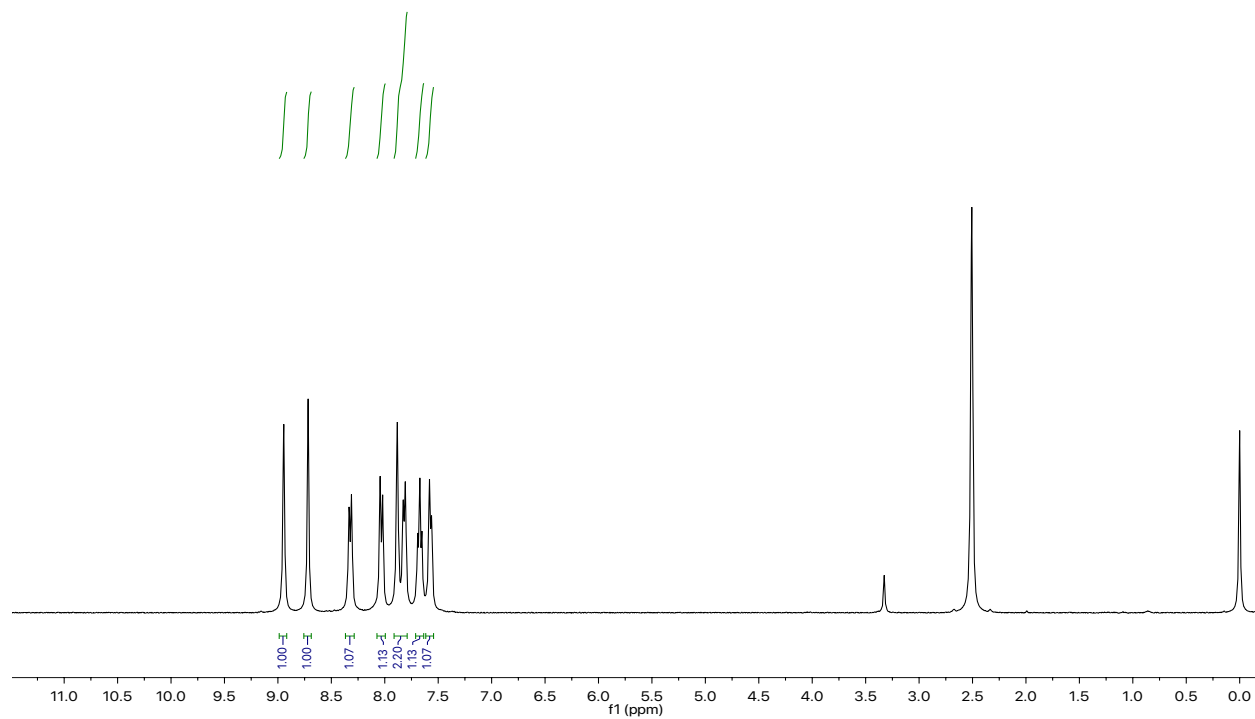

<sup>13</sup>C Spectrum of 1-(3-chlorophenyl)-5-nitro-1*H*-indazole (**12f**)

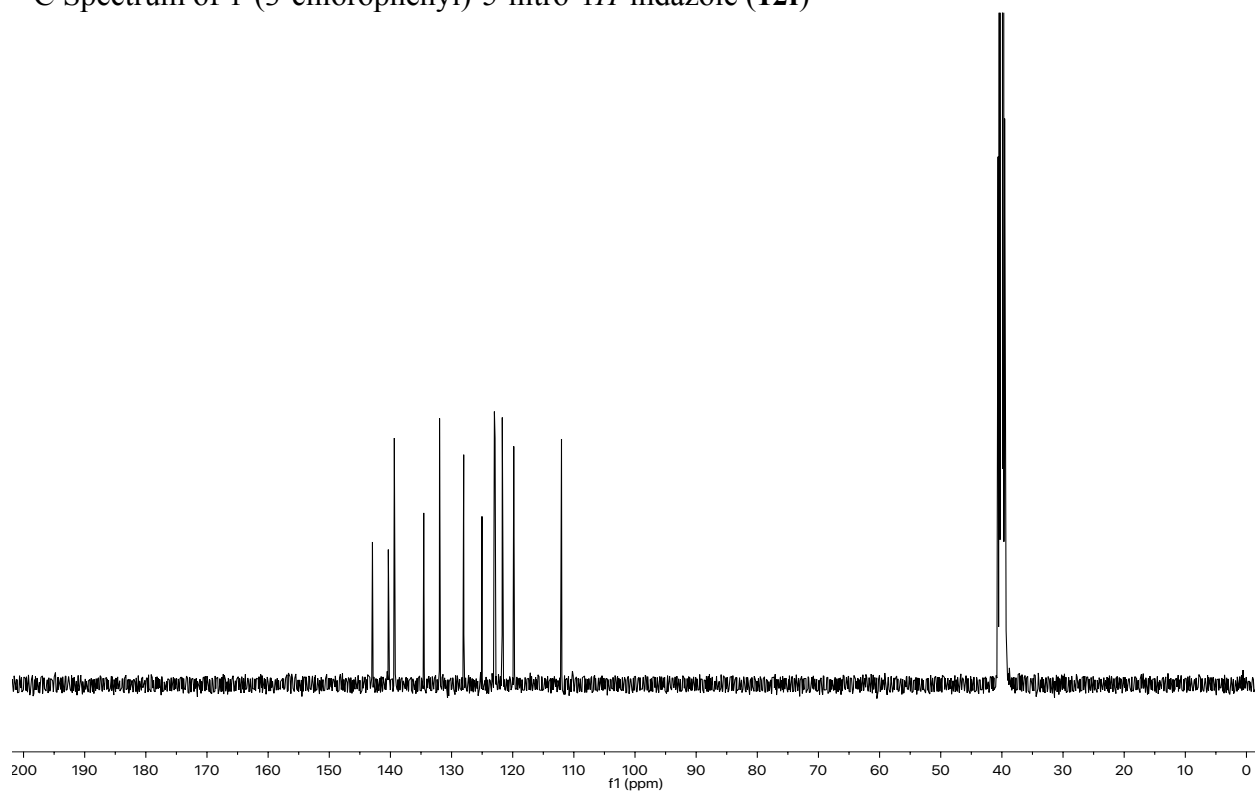

<sup>1</sup>H Spectrum of 1-(4-chlorophenyl)-5-nitro-1*H*-indazole (**12g**)

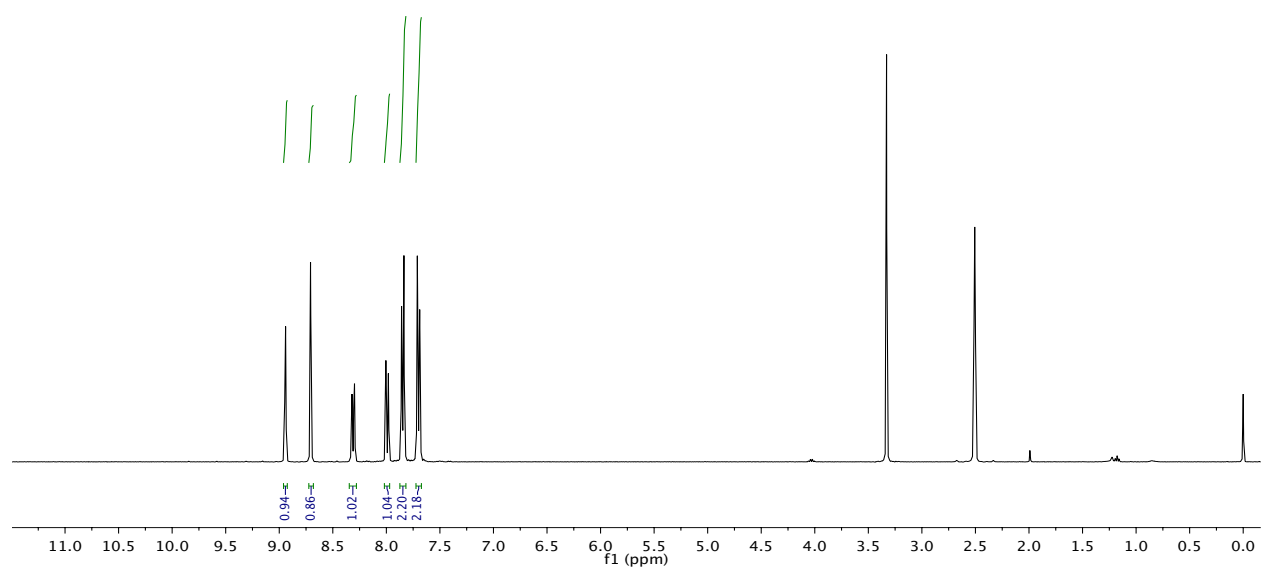

<sup>13</sup>C Spectra of 1-(4-chlorophenyl)-5-nitro-1*H*-indazole (**12g**)

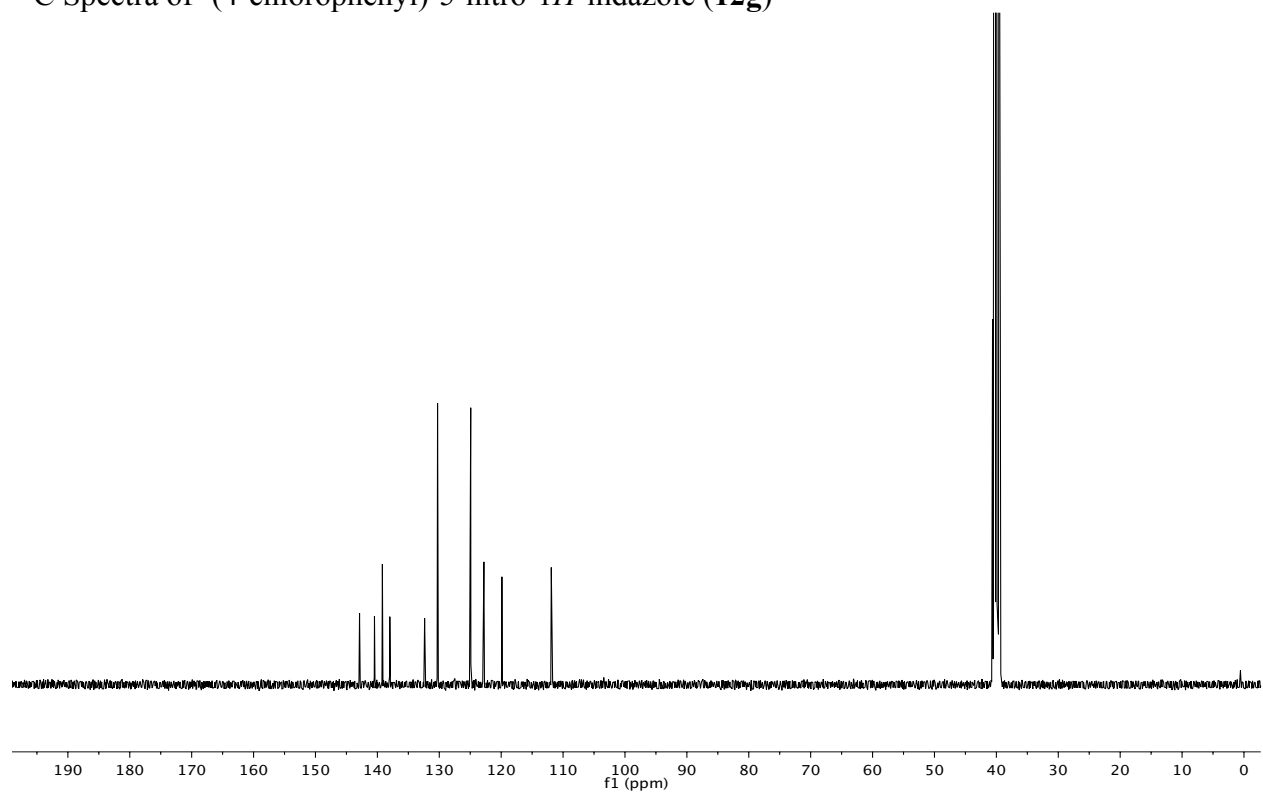

$^1\text{H}$  Spectrum of 1-(2,4-dichlorophenyl)-5-nitro-1*H*-indazole (**12h**)

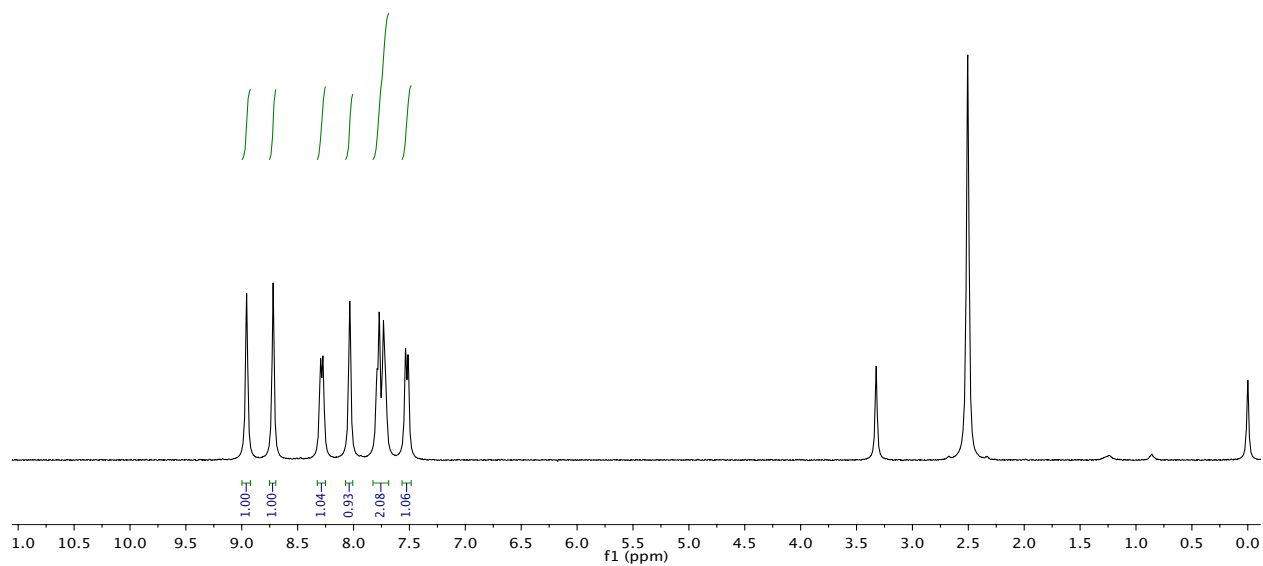

$^{13}\text{C}$  Spectrum of 1-(2,4-dichlorophenyl)-5-nitro-1*H*-indazole (**12h**)

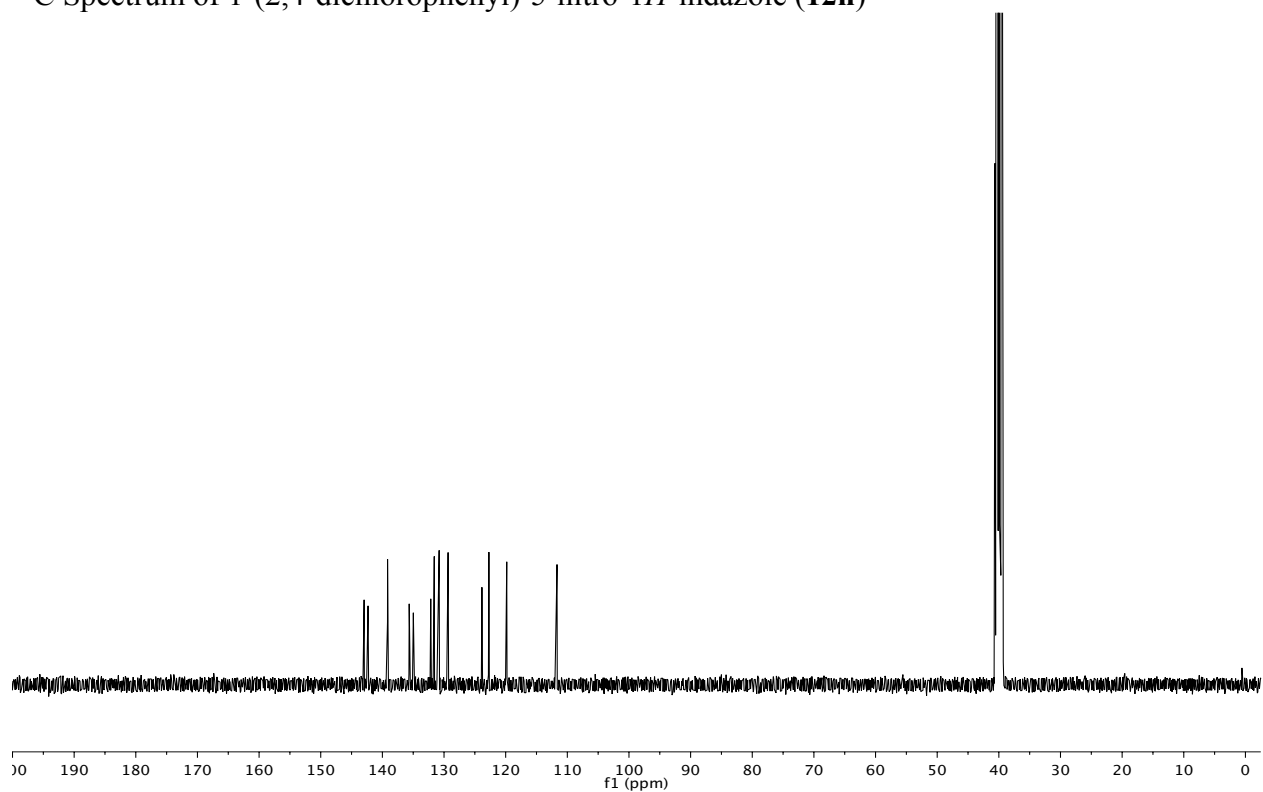

<sup>1</sup>H Spectrum of 1-(3-(trifluoromethyl)phenyl)-5-nitro-1*H*-indazole (**12i**)

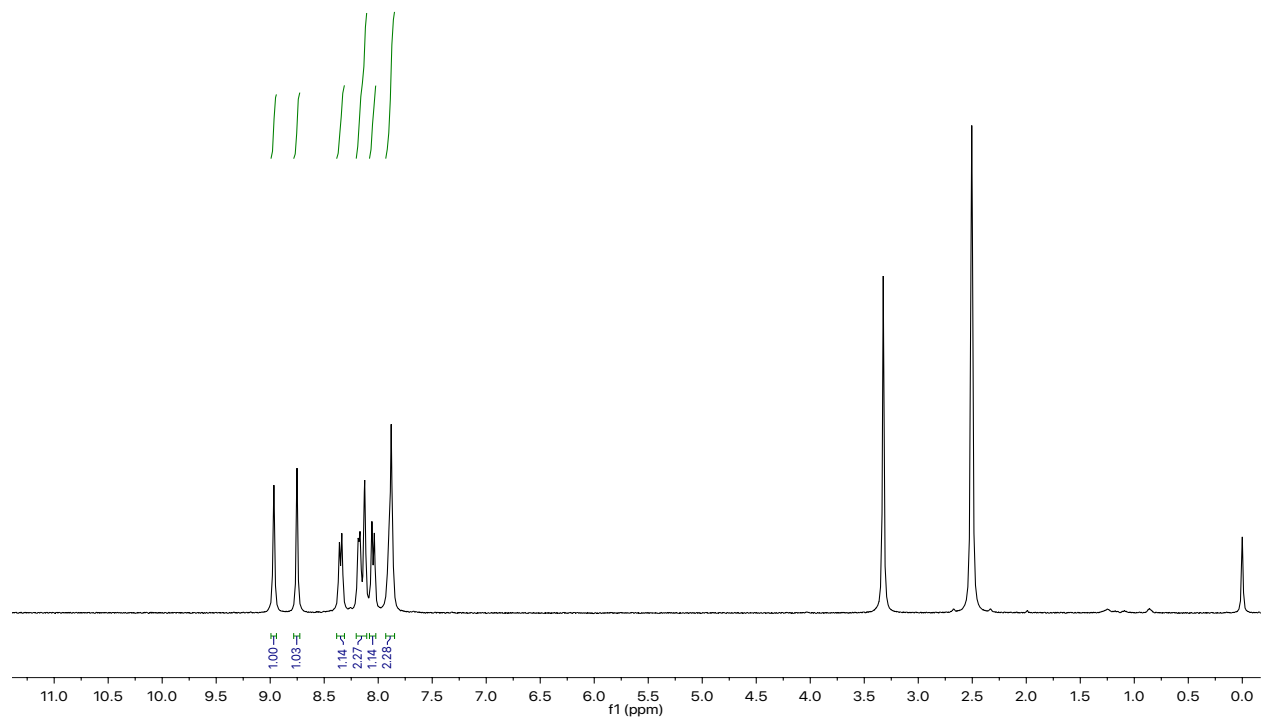

<sup>13</sup>C Spectrum of 1-(3-(trifluoromethyl)phenyl)-5-nitro-1*H*-indazole (**12i**)

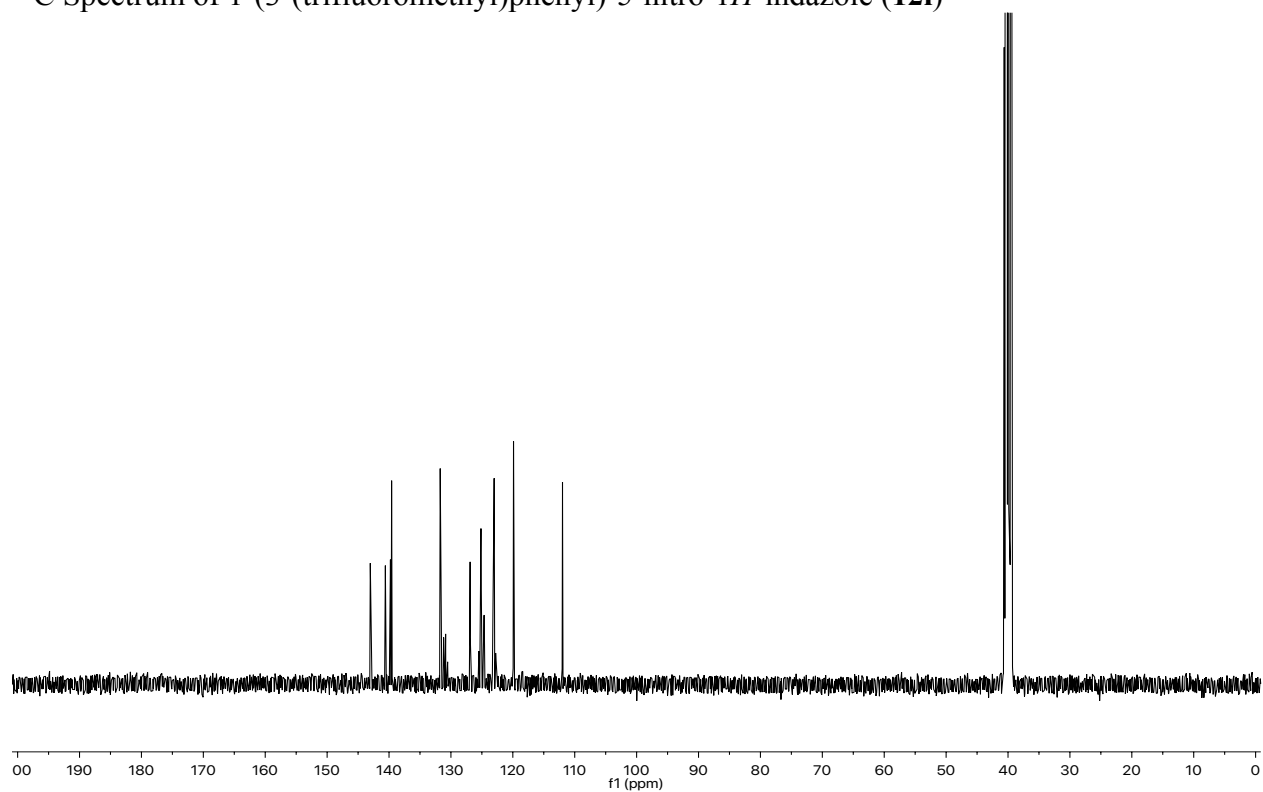

<sup>1</sup>H Spectrum of 1-(4-(trifluoromethyl)phenyl)-5-nitro-1*H*-indazole (**12j**)

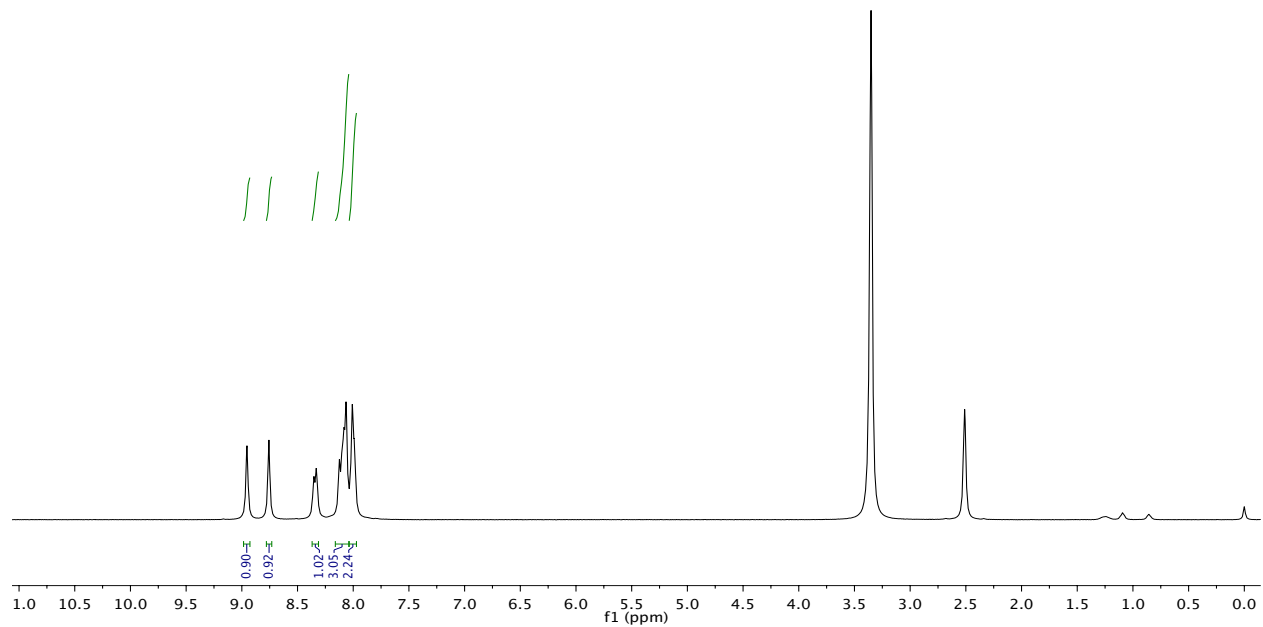

<sup>13</sup>C Spectrum of 1-(4-(trifluoromethyl)phenyl)-5-nitro-1*H*-indazole (**12j**)

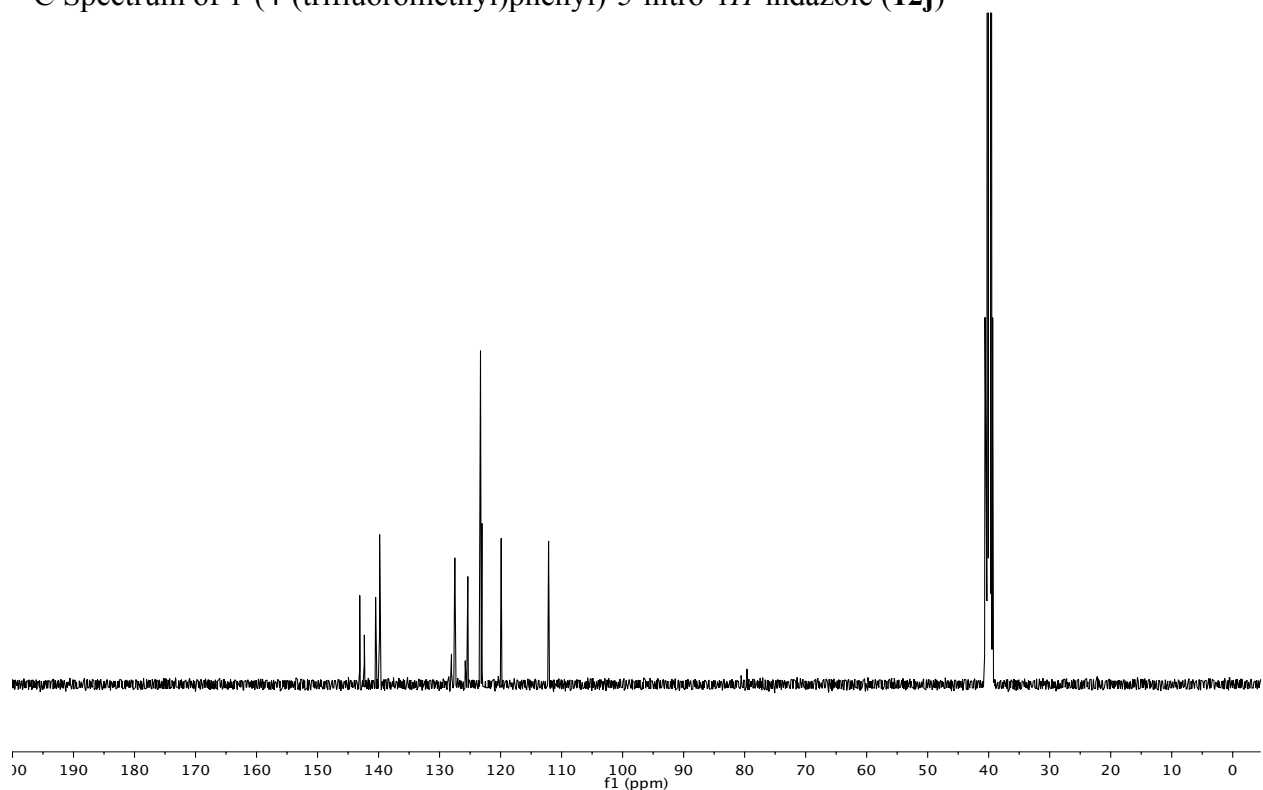

<sup>1</sup>H Spectrum of 1-(4-cyanophenyl)-5-nitro-1*H*-indazole (**12k**)

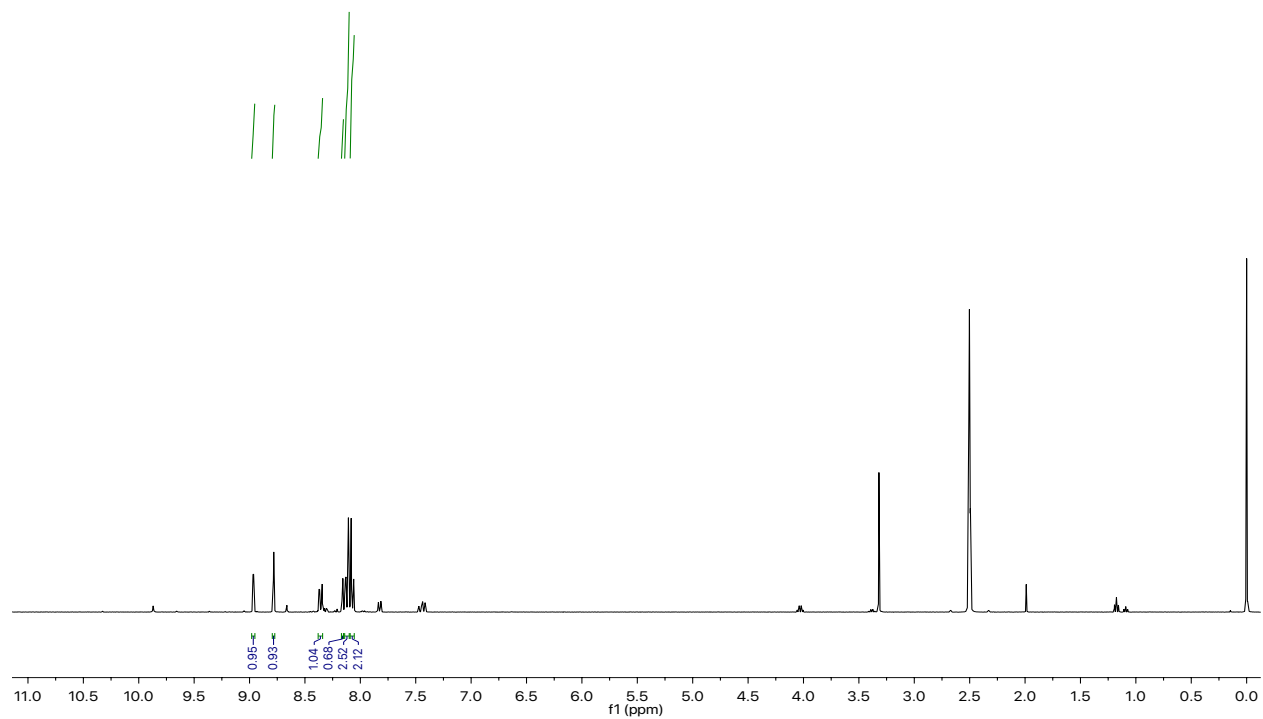

<sup>13</sup>C Spectrum of 1-(4-cyanophenyl)-5-nitro-1*H*-indazole (**12k**)

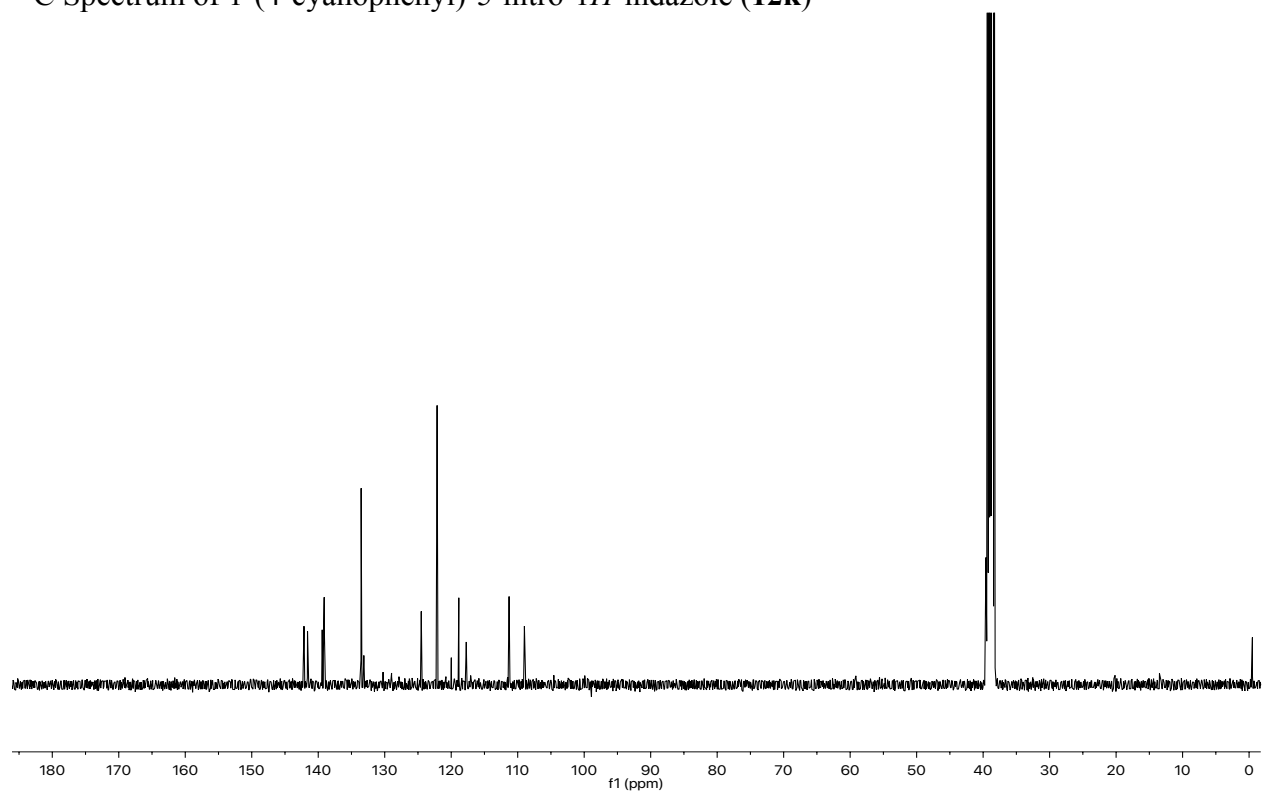

<sup>1</sup>H Spectrum of 4-(5-nitro-1*H*-indazol-1-yl)benzenesulfonamide (**12I**)

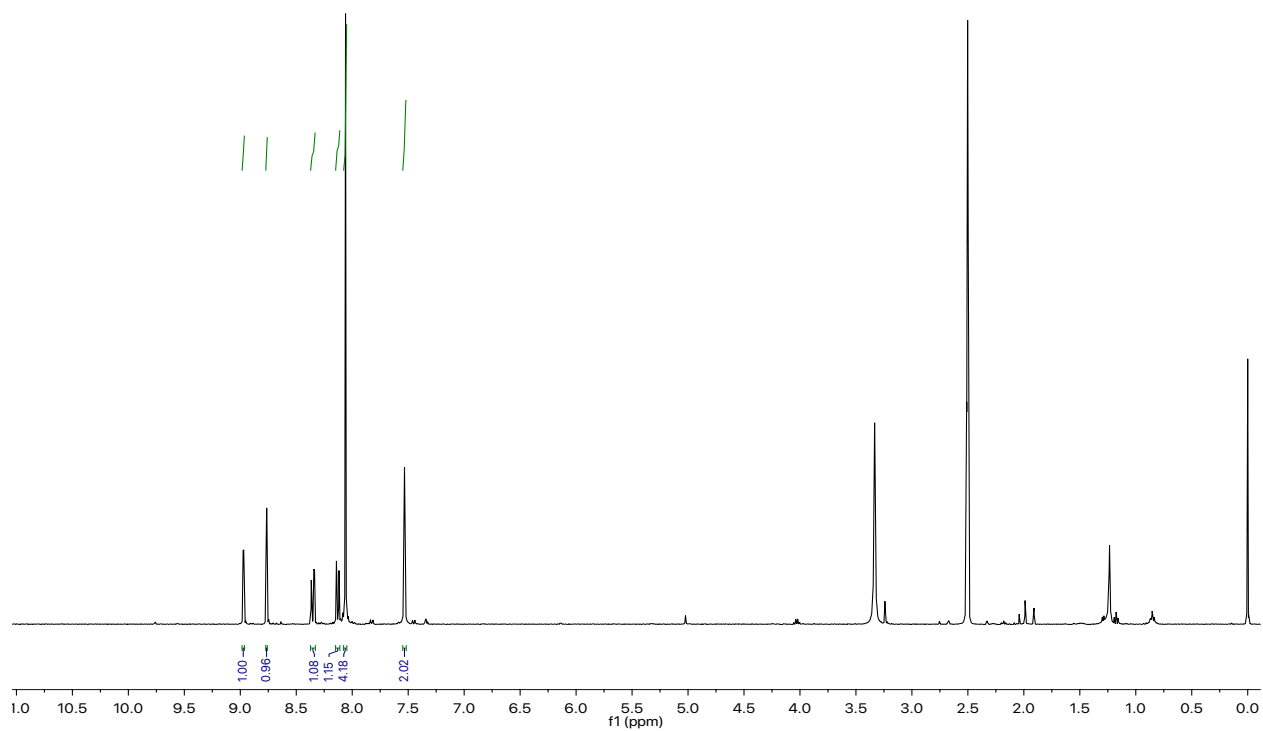

<sup>13</sup>C Spectrum of 4-(5-nitro-1*H*-indazol-1-yl)benzenesulfonamide (**12I**)

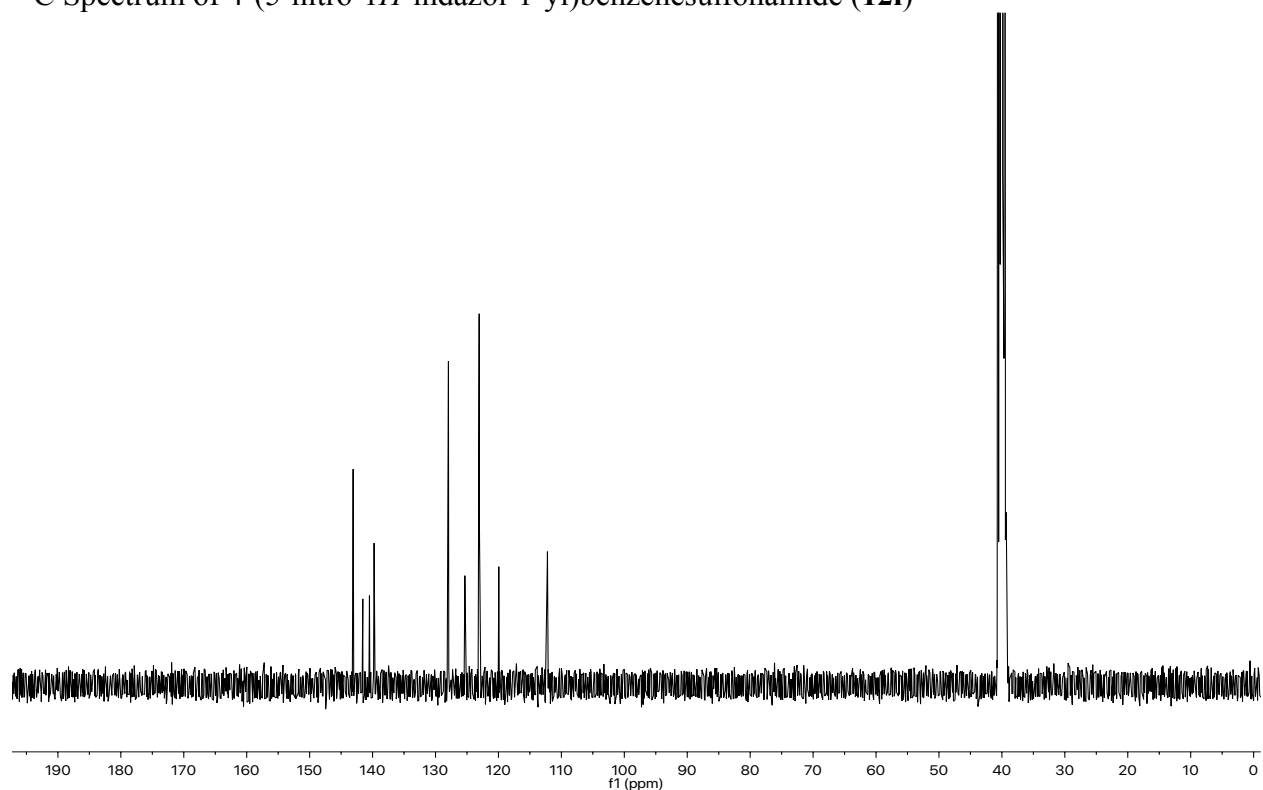



<sup>1</sup>H Spectrum of 4-(5-nitro-1*H*-indazol-1-yl)benzoic acid (**12m**)

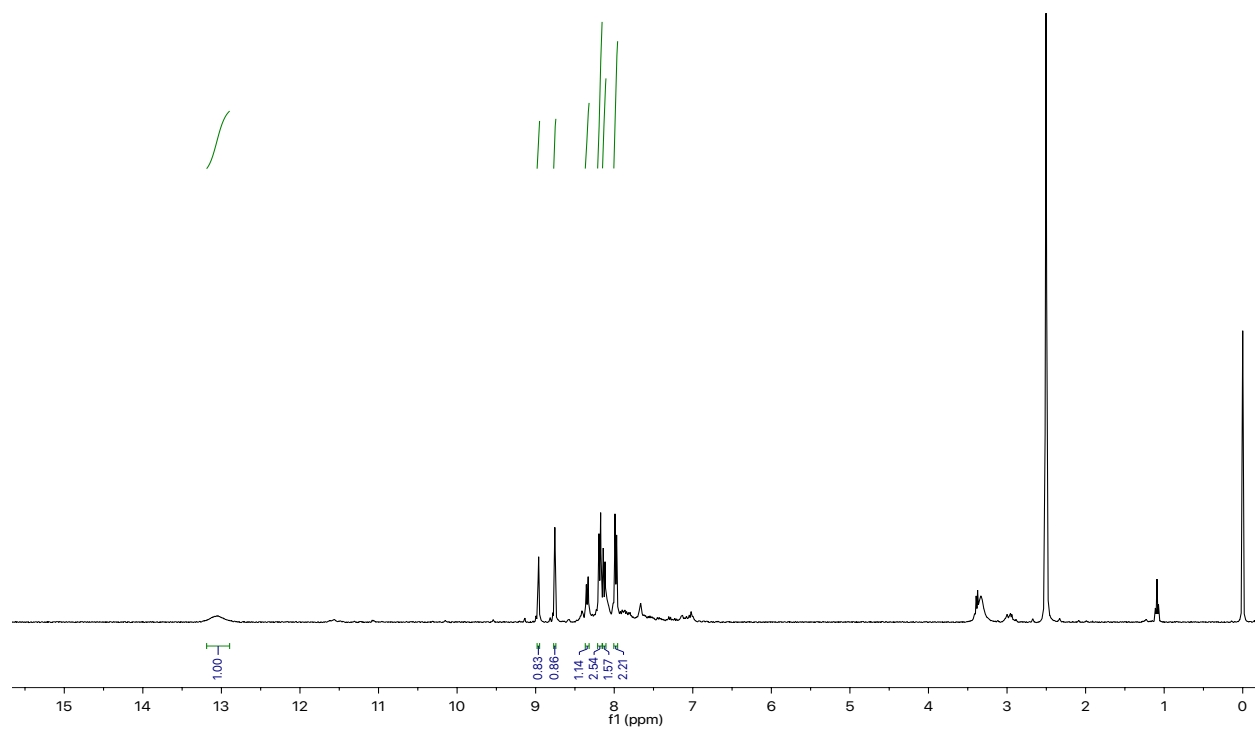

<sup>13</sup>C Spectrum of 4-(5-nitro-1*H*-indazol-1-yl)benzoic acid (**12m**)

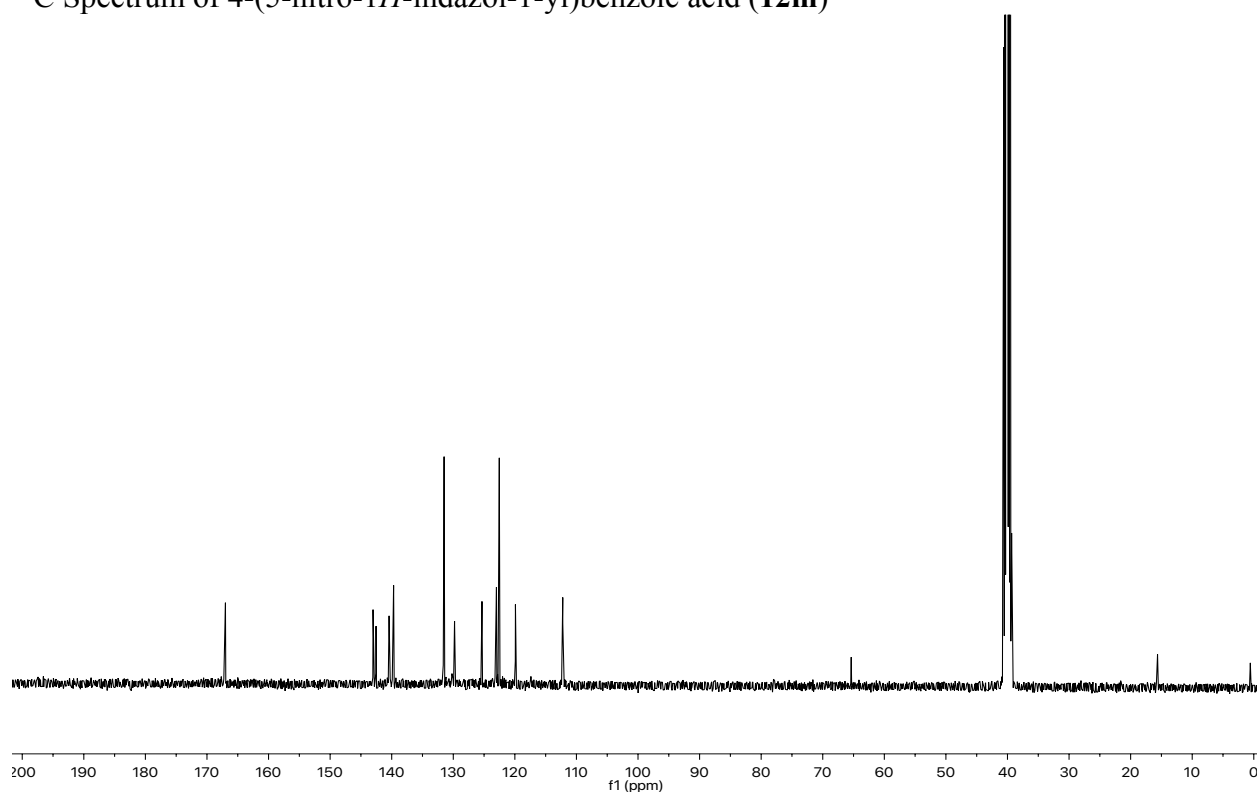

$^1\text{H}$  Spectrum of 3-methyl-1-phenyl-1*H*-indazole (**16a**)

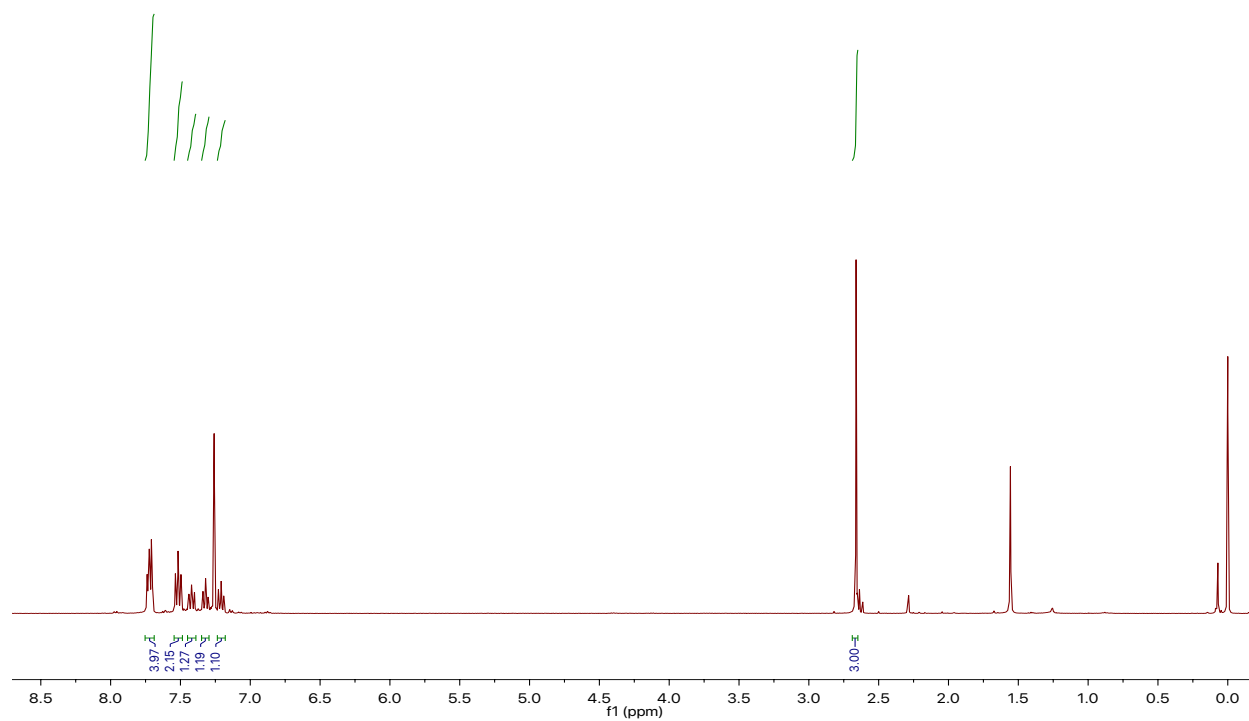

$^{13}\text{C}$  Spectrum of 3-methyl-1-phenyl-1*H*-indazole (**16a**)

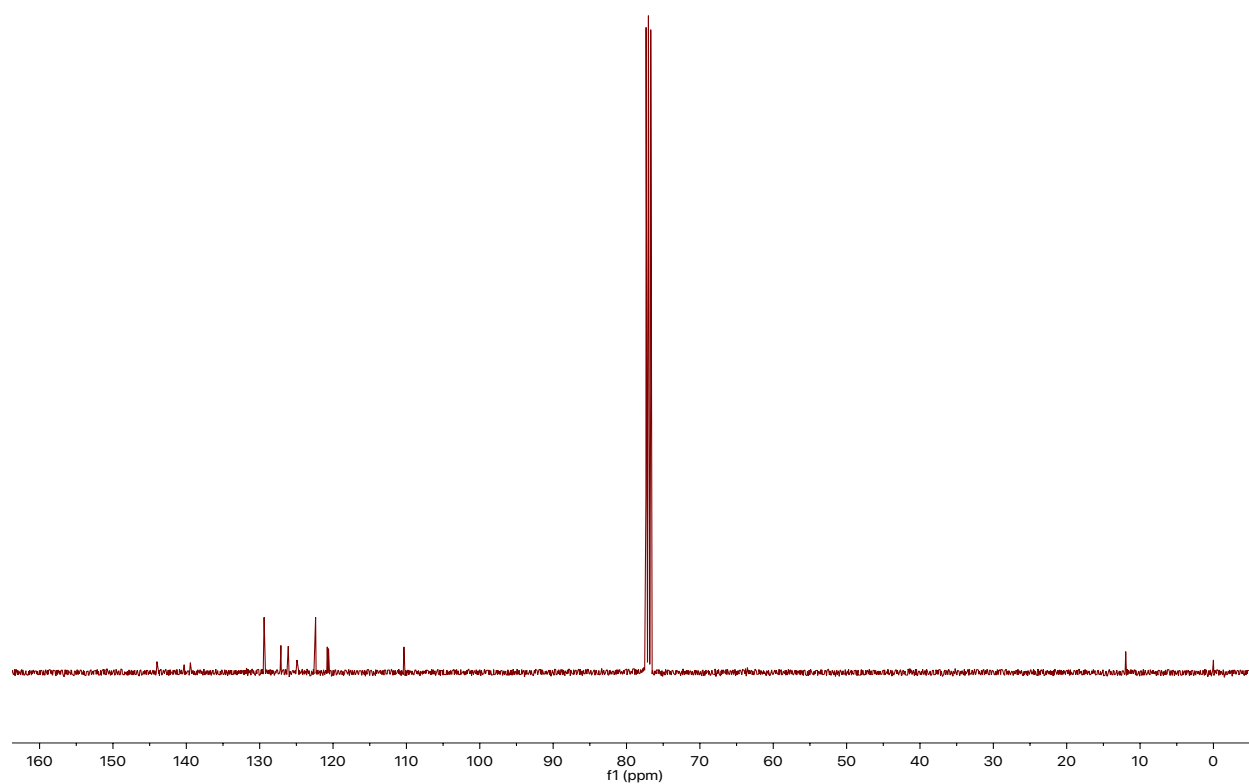

<sup>1</sup>H Spectrum of 1-(4-methoxyphenyl)-3-methyl-1*H*-indazole (**16d**)

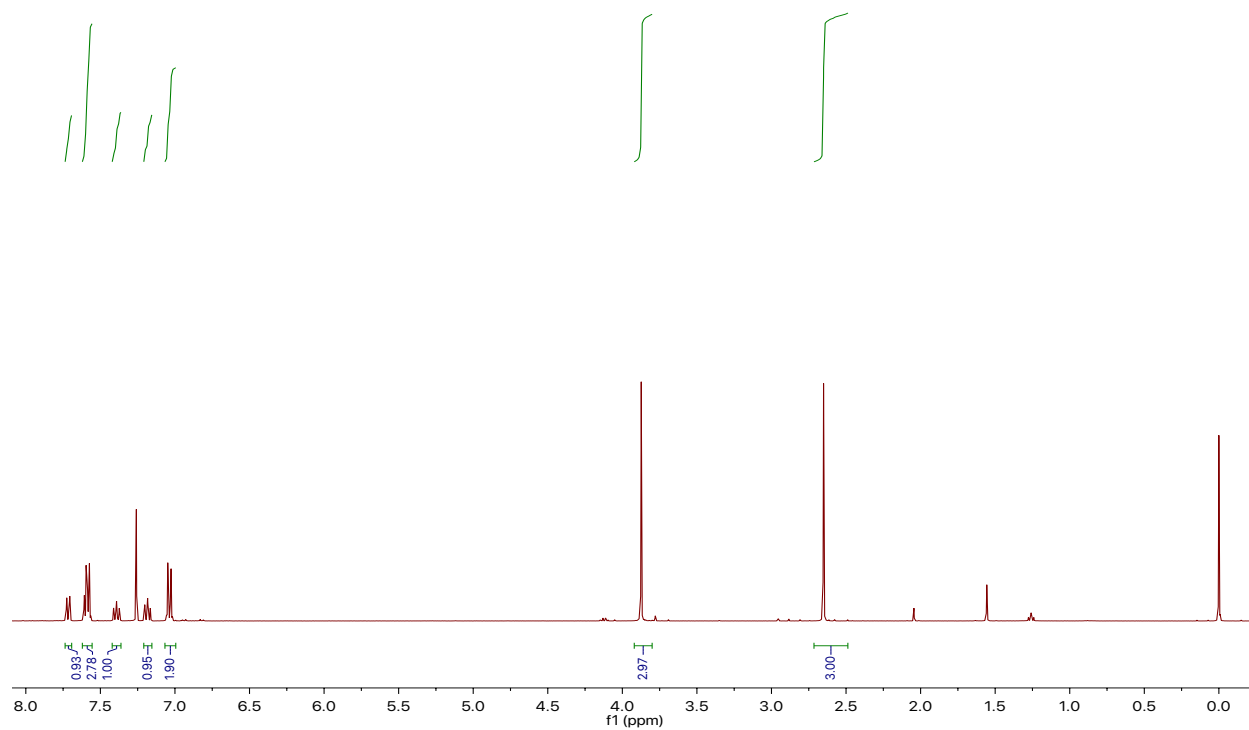

<sup>13</sup>C Spectrum of 1-(4-methoxyphenyl)-3-methyl-1*H*-indazole (**16d**)

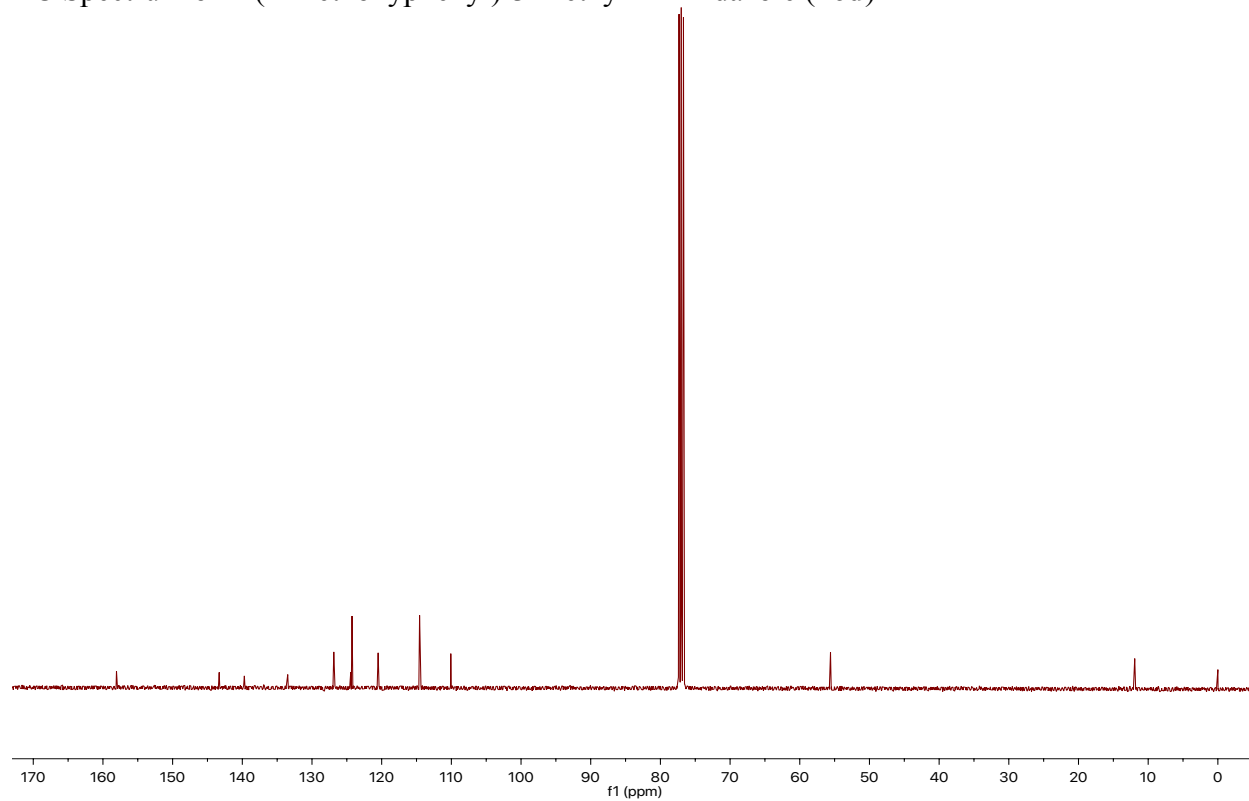

<sup>1</sup>H Spectrum of 4-(3-methyl-1*H*-indazol-1-yl)benzotrile (**16k**)

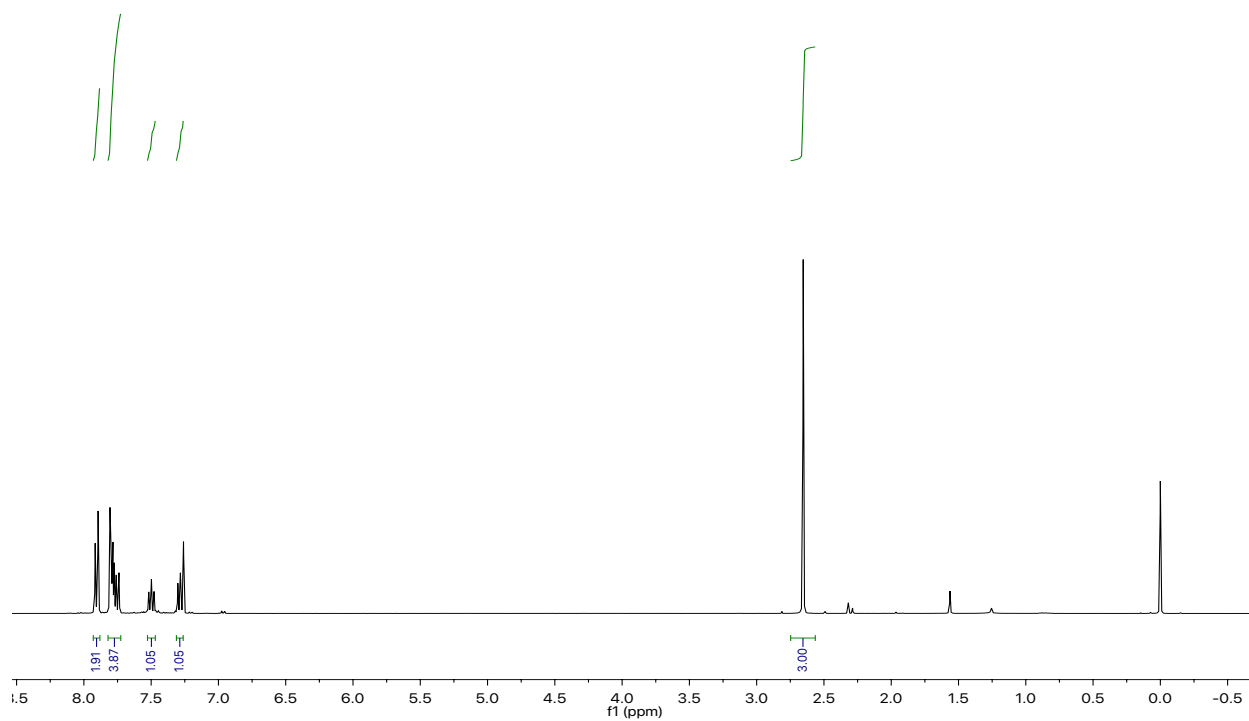

<sup>13</sup>C Spectrum of 4-(3-methyl-1*H*-indazol-1-yl)benzotrile (**16k**)

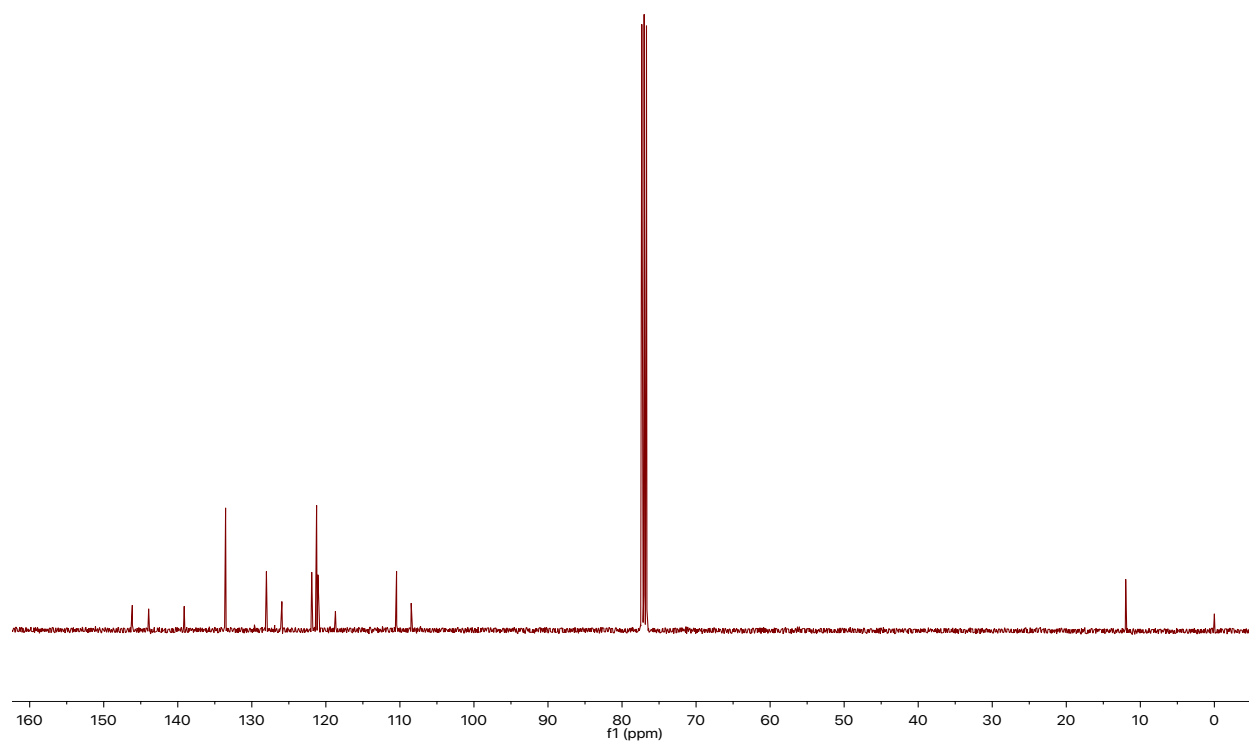

<sup>1</sup>H Spectrum of 1-phenyl-1*H*-indazole (**17a**)

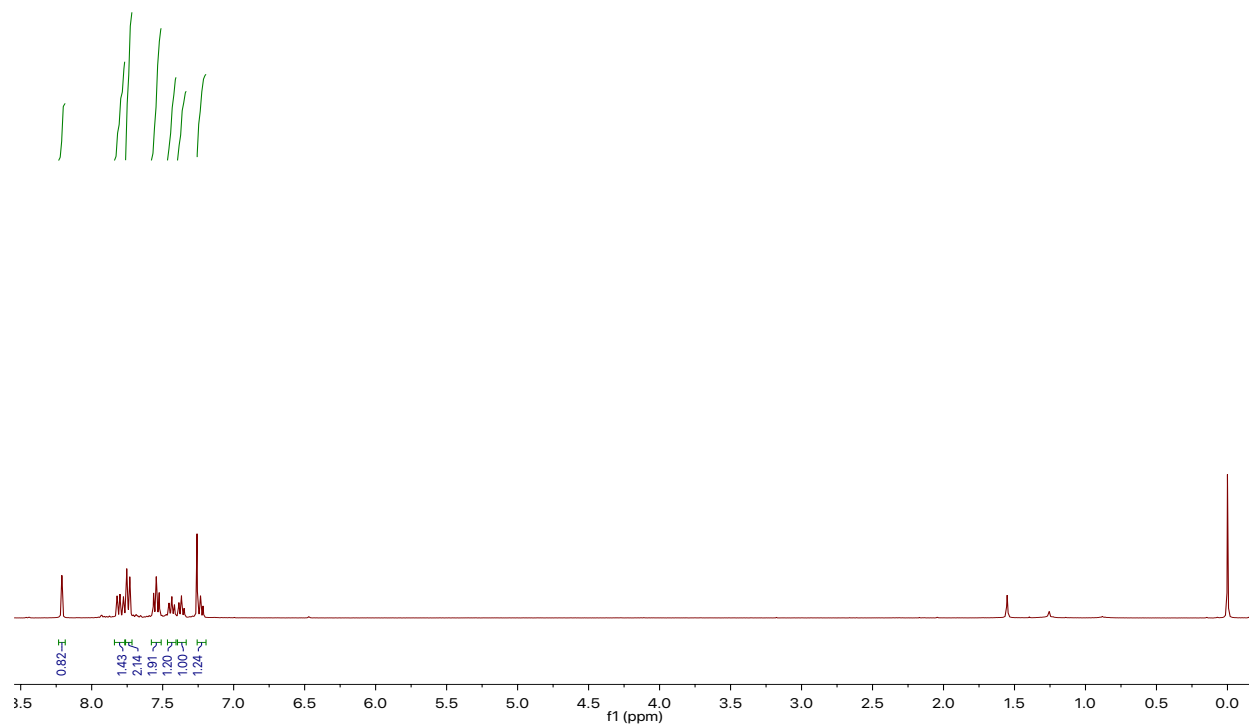

<sup>13</sup>C Spectrum of 1-phenyl-1*H*-indazole (**17a**)

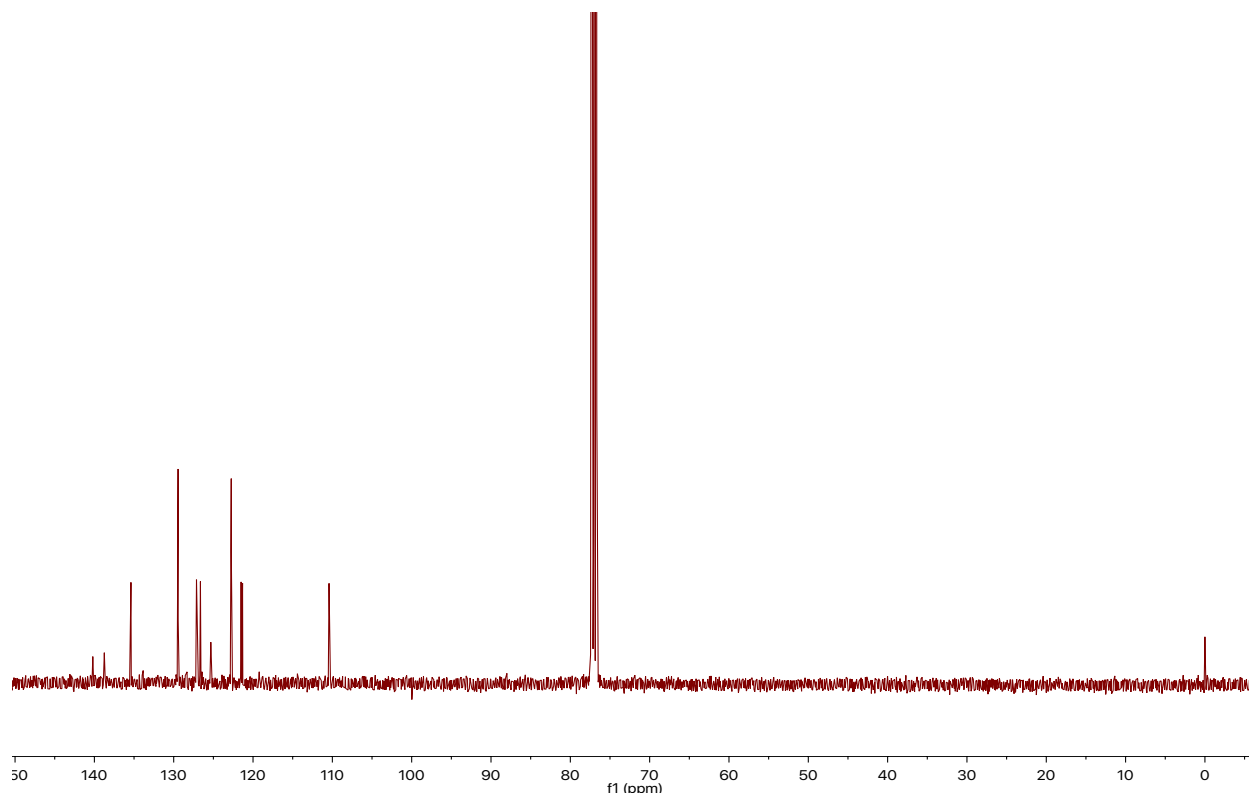

$^1\text{H}$  Spectrum of 1-(4-methoxyphenyl)-1*H*-indazole (**17d**)

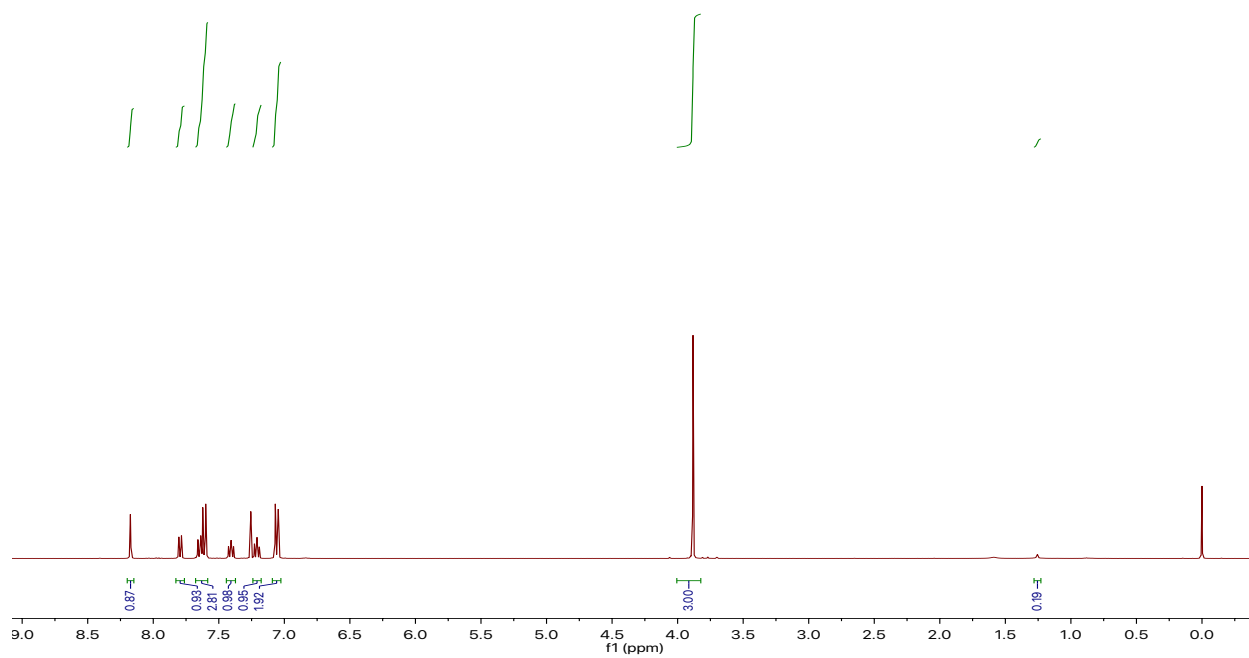

$^{13}\text{C}$  Spectra of 1-(4-methoxyphenyl)-1*H*-indazole (**17d**)

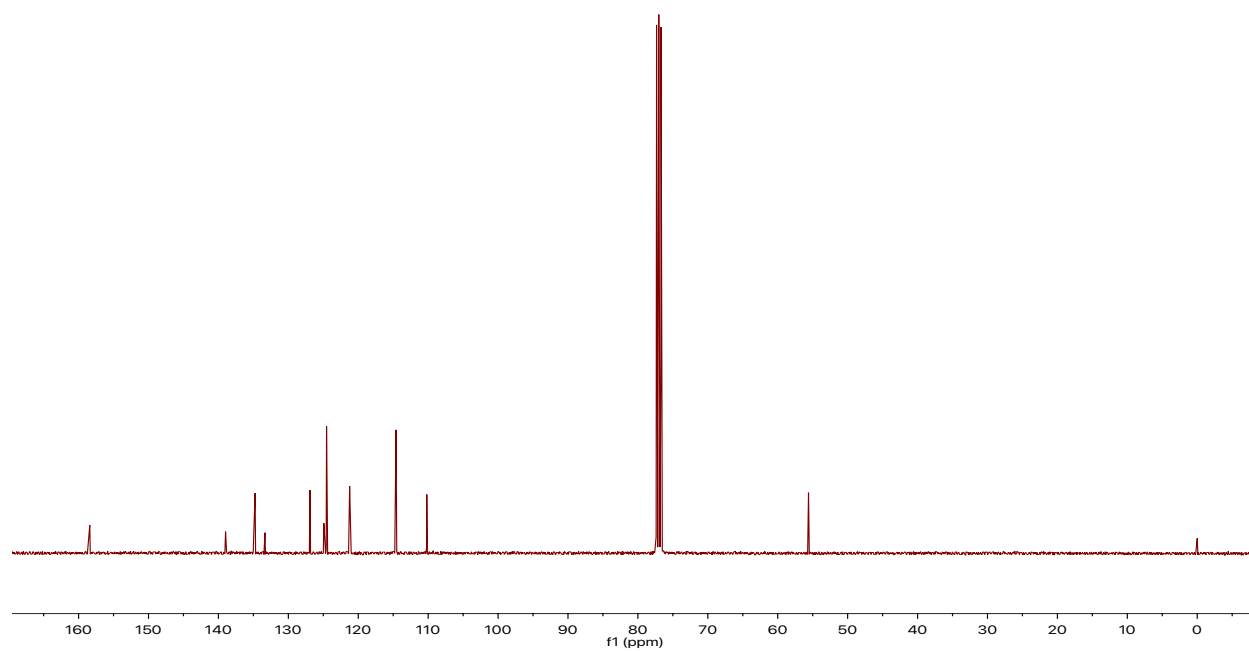

<sup>1</sup>H Spectrum of 4-(1*H*-indazol-1-yl)benzotrile (**17k**)

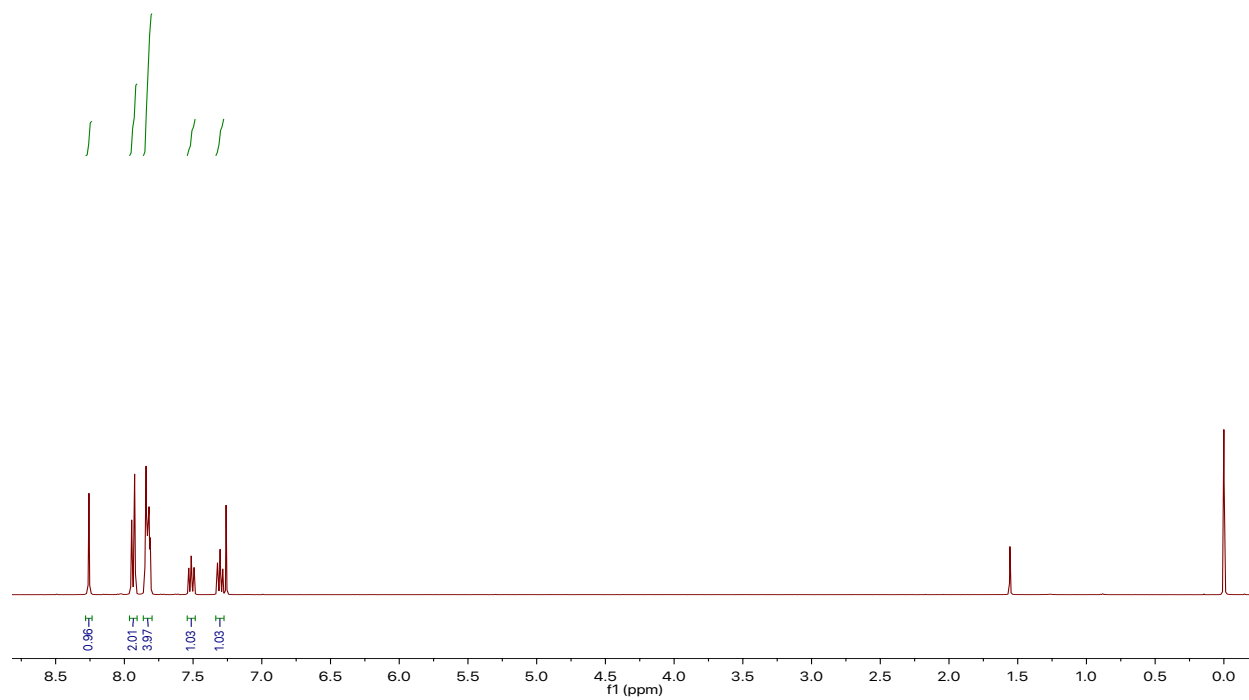

<sup>13</sup>C Spectrum of 4-(1*H*-indazol-1-yl)benzotrile (**17k**)

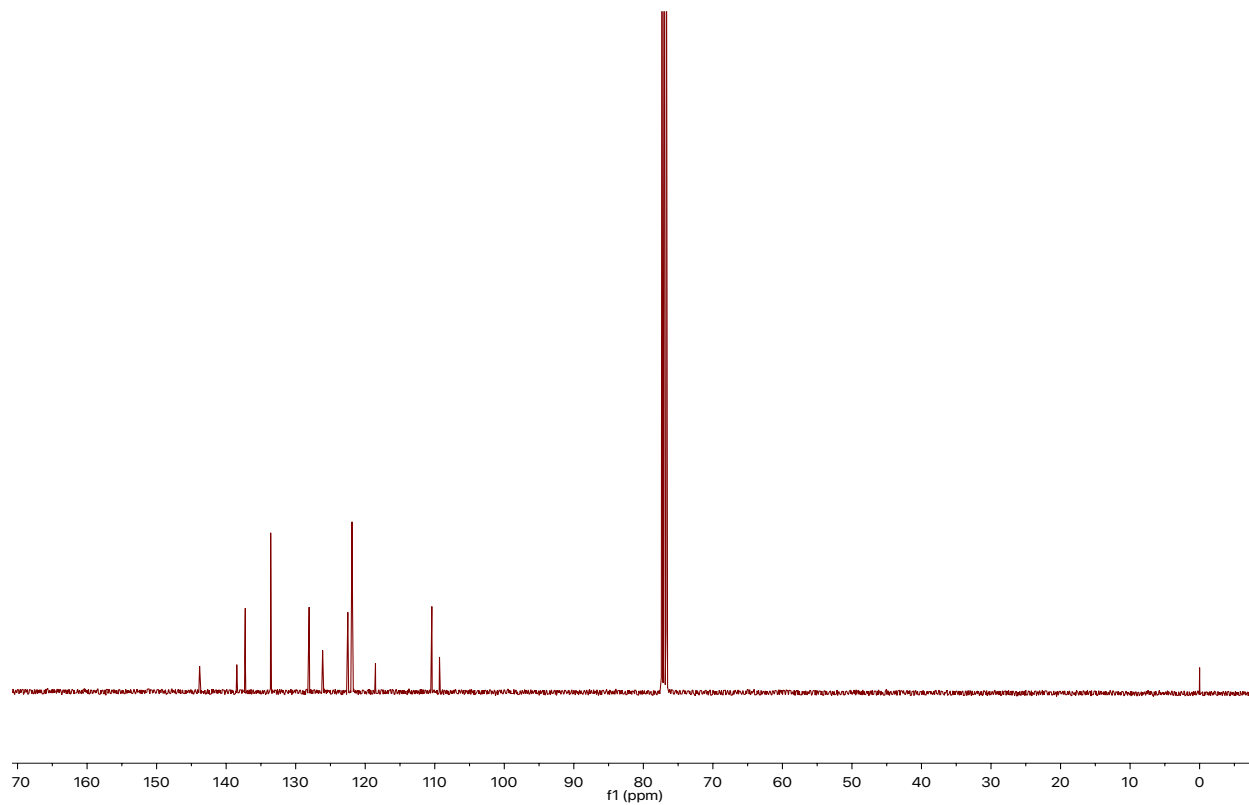

<sup>1</sup>H Spectrum of 1-phenyl-1*H*-pyrazolo[3,4-*b*]pyridine (**18a**)

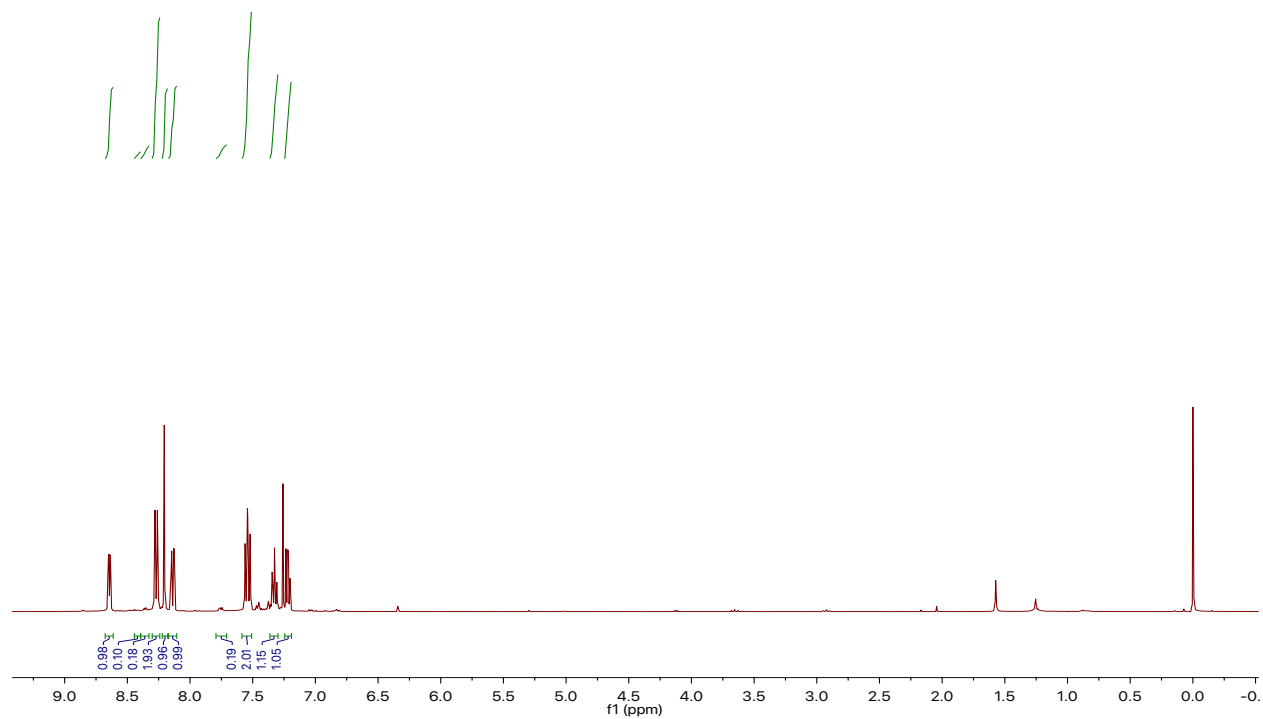

<sup>13</sup>C Spectrum of 1-phenyl-1*H*-pyrazolo[3,4-*b*]pyridine (**18a**)

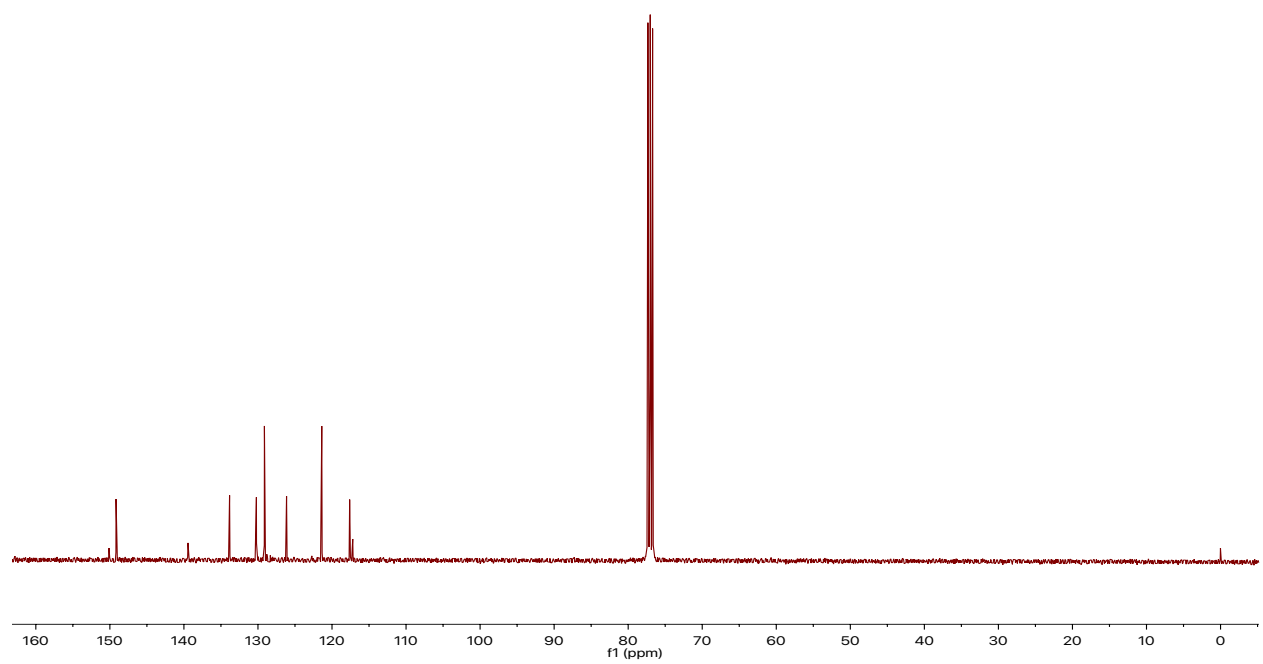



<sup>1</sup>H Spectrum of 1-(4-methoxyphenyl)-1*H*-pyrazolo[3,4-*b*]pyridine (**18d**)

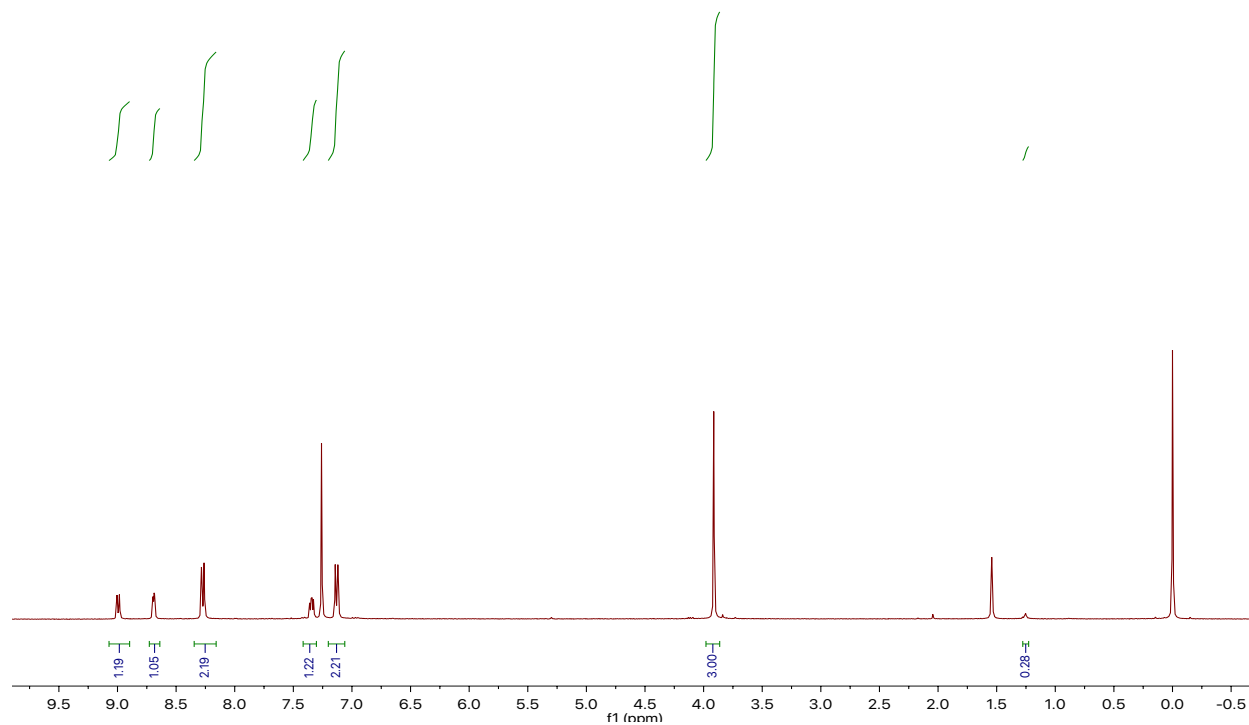

<sup>13</sup>C Spectrum of 1-(4-methoxyphenyl)-1*H*-pyrazolo[3,4-*b*]pyridine (**18d**)

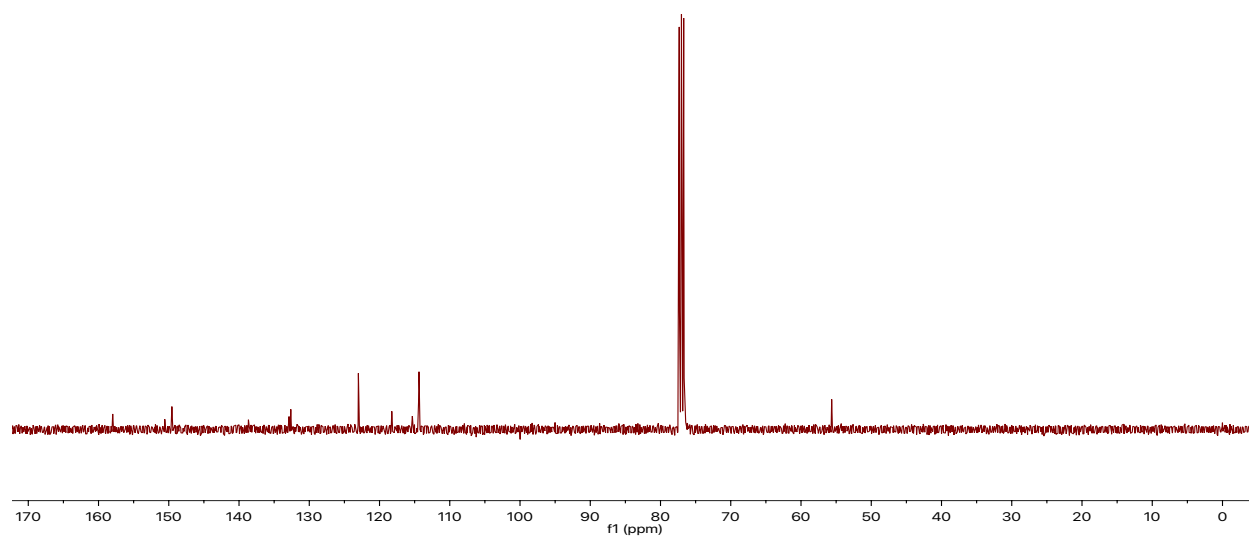

<sup>1</sup>H Spectrum of 4-(1*H*-pyrazolo[3,4-*b*]pyridin-1-yl)benzonitrile (**18k**)

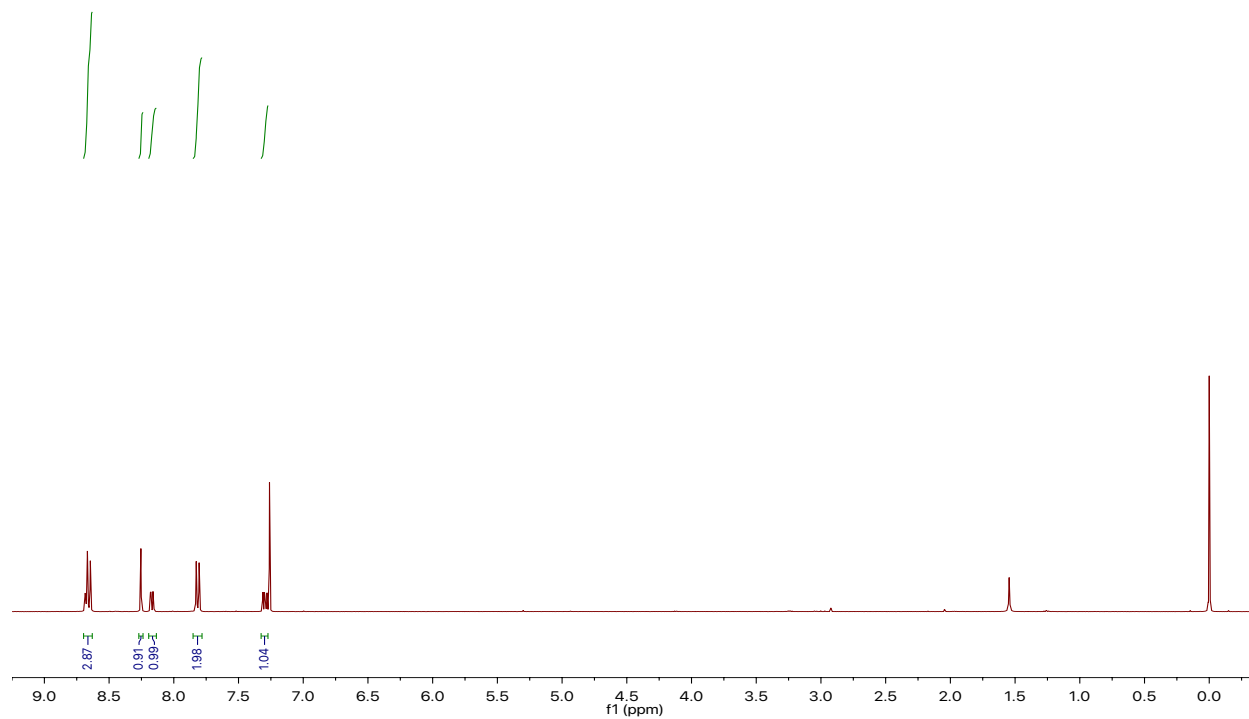

<sup>13</sup>C Spectrum of 4-(1*H*-pyrazolo[3,4-*b*]pyridin-1-yl)benzonitrile (**18k**)

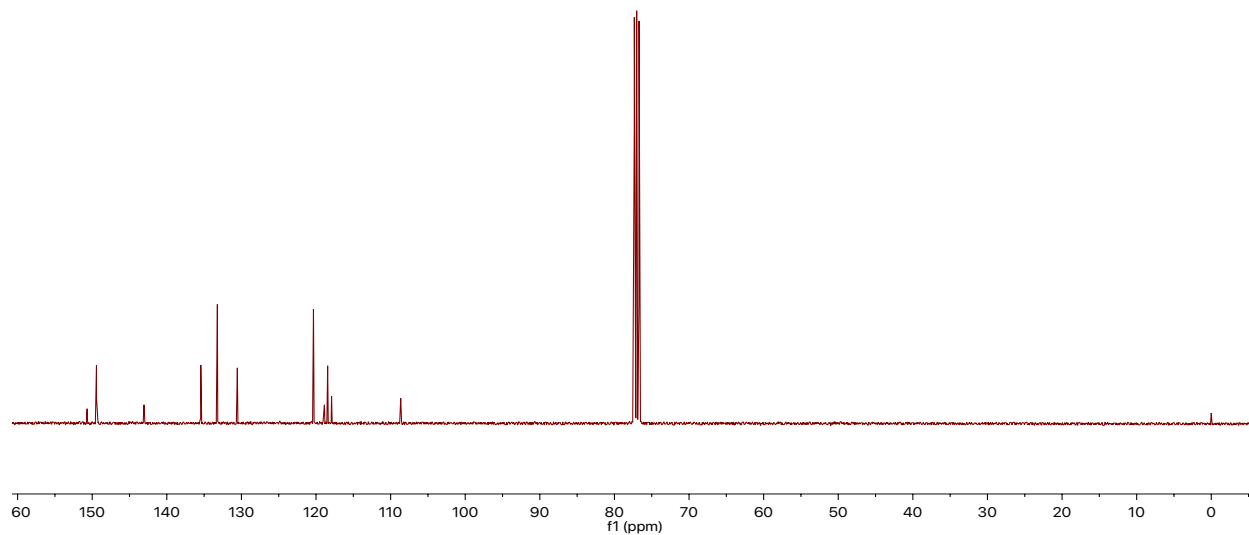

Supplement: molecules-23-00674-s001.pdf [file molecules-23-00674-s001.pdf]
